# Supplementary material
Source: publisher figshare collection journal article supplement (https://acs.figshare.com/ndownloader/files/5137870)
Supplement: Supplementary file 1 [file 5137870]

data_Yan

# SUBMISSION DETAILS 

_publ_contact_author_name    'Prof. Chun-Hua Yan'
_publ_contact_author_address
;
State Key Lab of Rare Earth Materials Chemistry and Applications & 
PKU-HKU Joint Lab on Rare Earth Materials and Bioinorganic Chemistry, 
College of Chemistry and Molecular Engineering, 
Peking University, 
Beijing 100871, 
China
;
_publ_contact_author_email  chyan@chem.pku.edu.cn
_publ_contact_author_phone  '86-(10)-62754179'
_publ_contact_author_fax  '86-(10)-62754179'

_publ_requested_journal   'Inorg. Chem.'

_publ_section_title
;
coordination polymers based on inorganic lanthanide(III)-sulfate
skeletons and organic isonicotinate-N-oxide connector: segregation
into three structural types by lanthanide contraction effect
;

## Crystallographic Data of Complex 1
 
data_1 
 
_audit_creation_method            SHELXL-97 
_chemical_name_systematic 
; 
 ? 
; 
_chemical_name_common             ? 
_chemical_melting_point           ? 
_chemical_formula_moiety          ? 
_chemical_formula_sum 
 'C6 H6 La N O8 S' 
_chemical_formula_weight          391.09 
 
loop_ 
 _atom_type_symbol 
 _atom_type_description 
 _atom_type_scat_dispersion_real 
 _atom_type_scat_dispersion_imag 
 _atom_type_scat_source 
 'C'  'C'   0.0033   0.0016 
 'International Tables Vol C Tables 4.2.6.8 and 6.1.1.4' 
 'H'  'H'   0.0000   0.0000 
 'International Tables Vol C Tables 4.2.6.8 and 6.1.1.4' 
 'N'  'N'   0.0061   0.0033 
 'International Tables Vol C Tables 4.2.6.8 and 6.1.1.4' 
 'O'  'O'   0.0106   0.0060 
 'International Tables Vol C Tables 4.2.6.8 and 6.1.1.4' 
 'S'  'S'   0.1246   0.1234 
 'International Tables Vol C Tables 4.2.6.8 and 6.1.1.4' 
 'La'  'La'  -0.2871   2.4523 
 'International Tables Vol C Tables 4.2.6.8 and 6.1.1.4' 
 
_symmetry_cell_setting            'triclinic' 
_symmetry_space_group_name_H-M    'P-1' 
 
loop_ 
 _symmetry_equiv_pos_as_xyz 
 'x, y, z' 
 '-x, -y, -z' 
 
_cell_length_a                    6.6774(3) 
_cell_length_b                    7.3389(4) 
_cell_length_c                    10.4329(6) 
_cell_angle_alpha                 77.323(2) 
_cell_angle_beta                  87.664(2) 
_cell_angle_gamma                 89.533(3) 
_cell_volume                      498.38(5) 
_cell_formula_units_Z             2 
_cell_measurement_temperature     293(2) 
_cell_measurement_reflns_used     12470
_cell_measurement_theta_min        3.58
_cell_measurement_theta_max        27.48
 
_exptl_crystal_description        'block' 
_exptl_crystal_colour             'colorless' 
_exptl_crystal_size_max           0.10 
_exptl_crystal_size_mid           0.07 
_exptl_crystal_size_min           0.07 
_exptl_crystal_density_meas       ? 
_exptl_crystal_density_diffrn     2.606 
_exptl_crystal_density_method     'not measured' 
_exptl_crystal_F_000              372 
_exptl_absorpt_coefficient_mu     4.528 
_exptl_absorpt_correction_type    empirical 
_exptl_absorpt_correction_T_min   0.648 
_exptl_absorpt_correction_T_max   0.734 
_exptl_absorpt_process_details    '(Blessing, 1995, 1997)' 
 
_exptl_special_details 
; 
 ? 
; 
 
_diffrn_ambient_temperature       293(2) 
_diffrn_radiation_wavelength      0.71073 
_diffrn_radiation_type            MoK\a 
_diffrn_radiation_source          'fine-focus sealed tube' 
_diffrn_radiation_monochromator   graphite 
_diffrn_measurement_device_type   'NONIUS KappaCCD Diffractometer' 
_diffrn_measurement_method        'CCD' 
_diffrn_detector_area_resol_mean  0.76 
_diffrn_standards_number          ? 
_diffrn_standards_interval_count  ? 
_diffrn_standards_interval_time   ? 
_diffrn_standards_decay_%         none 
_diffrn_reflns_number             9648 
_diffrn_reflns_av_R_equivalents   0.0696 
_diffrn_reflns_av_sigmaI/netI     0.0837 
_diffrn_reflns_limit_h_min        -8 
_diffrn_reflns_limit_h_max        8 
_diffrn_reflns_limit_k_min        -9 
_diffrn_reflns_limit_k_max        9 
_diffrn_reflns_limit_l_min        -13 
_diffrn_reflns_limit_l_max        13 
_diffrn_reflns_theta_min          3.58 
_diffrn_reflns_theta_max          27.48 
_reflns_number_total              2287 
_reflns_number_gt                 1776 
_reflns_threshold_expression      >2sigma(I) 
 
_computing_data_collection        'KappaCCD (Nonius B. V., 1998)' 
_computing_cell_refinement        'HKL Scalepack (Otwinowski & Minor, 1997)' 
_computing_data_reduction
'HKL Denzo (Otwinowski & Minor, 1997) & maXus (Mackay et al., 1998)'
_computing_structure_solution     'SHELXS-97 (Sheldrick, 1997)' 
_computing_structure_refinement   'SHELXL-97 (Sheldrick, 1997)' 
_computing_molecular_graphics     'Bruker SHELXTL V5.1 (Sheldrick, 1998)' 
_computing_publication_material   'SHELXL-97 (Sheldrick, 1997)' 

_publ_section_references
;
collect:
"Collect" data collection software, Nonius B.V., Delft, The Netherlands, 1998.

HKL Scalepack & HKL Denzo:
Z. Otwinowski and W. Minor, " Processing of X-ray Diffraction Data Collected
in Oscillation Mode ", Methods in Enzymology, Volume 276: Macromolecular
Crystallography, part A, p.307-326, 1997,C.W. Carter, Jr. & R.M. Sweet,
Eds., Academic Press, London.

absorption correction:
R.H. Blessing (1995) Acta Cryst. A51, 33-37.
R.H. Blessing (1997) J.Appl. Cryst. 30, 421-426.

maXus: 
S.Mackay, C.J.Gilmore, C.Edwards, M. Tremayne, N. Stuart, K.Shankland
"maXus: a computer program for the solution and refinement of crystal
structures from diffraction data", University of Glasgow, Scotland, UK,
Nonius BV, Delft, The Netherlands and MacScience Co. Ltd., Yokohama,
Japan (1998).

Sheldrick, G. M. (1998). SHELXTL Version 5.1. Bruker Analytical X-ray
Instruments Inc., Madison, Wisconsin, USA.

Sheldrick, G. M. (1997). SHELX-97. PC Version. University of Goettingen,
Germany.
;
 
_refine_special_details 
; 
 Refinement of F^2^ against ALL reflections.  The weighted R-factor wR and 
 goodness of fit S are based on F^2^, conventional R-factors R are based 
 on F, with F set to zero for negative F^2^. The threshold expression of 
 F^2^ > 2sigma(F^2^) is used only for calculating R-factors(gt) etc. and is 
 not relevant to the choice of reflections for refinement.  R-factors based 
 on F^2^ are statistically about twice as large as those based on F, and R- 
 factors based on ALL data will be even larger. 
; 
 
_refine_ls_structure_factor_coef  Fsqd  
_refine_ls_matrix_type            full 
_refine_ls_weighting_scheme       calc  
_refine_ls_weighting_details 
 'calc w=1/[\s^2^(Fo^2^)+(0.0141P)^2^+0.0000P] where P=(Fo^2^+2Fc^2^)/3' 
_atom_sites_solution_primary      direct 
_atom_sites_solution_secondary    difmap 
_atom_sites_solution_hydrogens    geom 
_refine_ls_hydrogen_treatment     mixed 
_refine_ls_extinction_method      SHELXL 
_refine_ls_extinction_coef        0.0066(8) 
_refine_ls_extinction_expression 
 'Fc^*^=kFc[1+0.001xFc^2^\l^3^/sin(2\q)]^-1/4^' 
_refine_ls_number_reflns          2287 
_refine_ls_number_parameters      163 
_refine_ls_number_restraints      0 
_refine_ls_R_factor_all           0.0527 
_refine_ls_R_factor_gt            0.0327 
_refine_ls_wR_factor_ref          0.0515 
_refine_ls_wR_factor_gt           0.0490 
_refine_ls_goodness_of_fit_ref    0.927 
_refine_ls_restrained_S_all       0.927 
_refine_ls_shift/su_max           0.001 
_refine_ls_shift/su_mean          0.000 
 
loop_ 
 _atom_site_label 
 _atom_site_type_symbol 
 _atom_site_fract_x 
 _atom_site_fract_y 
 _atom_site_fract_z 
 _atom_site_U_iso_or_equiv 
 _atom_site_adp_type 
 _atom_site_occupancy 
 _atom_site_symmetry_multiplicity 
 _atom_site_calc_flag 
 _atom_site_refinement_flags 
 _atom_site_disorder_assembly 
 _atom_site_disorder_group 
La1 La 0.32568(4) 0.73853(4) 0.01605(3) 0.01854(11) Uani 1 1 d . . . 
C1 C 0.2820(6) 0.5389(6) -0.3843(4) 0.0207(10) Uani 1 1 d . . . 
C2 C 0.2593(7) 0.7234(6) -0.4473(4) 0.0282(11) Uani 1 1 d . . . 
H2A H 0.2717 0.8160 -0.3999 0.034 Uiso 1 1 calc R . . 
C3 C 0.2188(7) 0.7734(7) -0.5782(5) 0.0298(11) Uani 1 1 d . . . 
H3A H 0.2085 0.8987 -0.6198 0.036 Uiso 1 1 calc R . . 
C4 C 0.2180(6) 0.4565(6) -0.5893(4) 0.0233(10) Uani 1 1 d . . . 
H4A H 0.2028 0.3658 -0.6380 0.028 Uiso 1 1 calc R . . 
C5 C 0.2651(6) 0.4052(6) -0.4593(4) 0.0230(10) Uani 1 1 d . . . 
H5A H 0.2860 0.2800 -0.4212 0.028 Uiso 1 1 calc R . . 
C6 C 0.3285(6) 0.4923(6) -0.2423(4) 0.0221(10) Uani 1 1 d . . . 
N1 N 0.1939(5) 0.6385(5) -0.6459(3) 0.0235(9) Uani 1 1 d . . . 
O1 O 0.2741(4) 0.6091(4) -0.1774(3) 0.0285(7) Uani 1 1 d . . . 
O2 O 0.4246(4) 0.3421(4) -0.1976(3) 0.0237(7) Uani 1 1 d . . . 
O3 O 0.1385(4) 0.6869(4) -0.7697(3) 0.0292(7) Uani 1 1 d . . . 
O4 O 0.6541(4) 0.9327(4) -0.0669(3) 0.0220(7) Uani 1 1 d . . . 
O5 O 0.6670(4) 0.6184(4) -0.0841(3) 0.0247(7) Uani 1 1 d . . . 
O6 O 0.9568(4) 0.7573(4) -0.0087(3) 0.0282(7) Uani 1 1 d . . . 
O7 O 0.8716(4) 0.8463(4) -0.2363(3) 0.0271(7) Uani 1 1 d . . . 
O8 O 0.2524(6) 0.9928(6) -0.1953(4) 0.0316(9) Uani 1 1 d . . . 
S1 S 0.79419(15) 0.78863(15) -0.10096(10) 0.0212(3) Uani 1 1 d . . . 
HW1 H 0.263(8) 1.082(7) -0.193(5) 0.028(19) Uiso 1 1 d . . . 
HW2 H 0.131(9) 0.968(8) -0.204(6) 0.07(2) Uiso 1 1 d . . . 
 
loop_ 
 _atom_site_aniso_label 
 _atom_site_aniso_U_11 
 _atom_site_aniso_U_22 
 _atom_site_aniso_U_33 
 _atom_site_aniso_U_23 
 _atom_site_aniso_U_13 
 _atom_site_aniso_U_12 
La1 0.02006(16) 0.01868(16) 0.01735(15) -0.00487(10) -0.00160(9) 0.00104(10) 
C1 0.022(2) 0.022(3) 0.017(2) -0.002(2) 0.0026(18) 0.0004(19) 
C2 0.038(3) 0.027(3) 0.021(3) -0.007(2) -0.005(2) 0.000(2) 
C3 0.036(3) 0.024(3) 0.030(3) -0.004(2) -0.008(2) 0.001(2) 
C4 0.025(2) 0.024(3) 0.022(2) -0.008(2) 0.0017(19) -0.001(2) 
C5 0.019(2) 0.025(3) 0.024(2) -0.002(2) 0.0012(19) 0.0029(19) 
C6 0.022(2) 0.024(3) 0.022(2) -0.007(2) 0.0003(19) -0.007(2) 
N1 0.0217(19) 0.031(2) 0.017(2) -0.0048(18) 0.0007(16) 0.0014(17) 
O1 0.0382(19) 0.0244(18) 0.0251(17) -0.0092(15) -0.0092(14) 0.0060(15) 
O2 0.0284(16) 0.0236(18) 0.0205(17) -0.0072(14) -0.0041(13) 0.0010(14) 
O3 0.0291(17) 0.041(2) 0.0162(16) -0.0036(15) -0.0037(13) 0.0045(15) 
O4 0.0202(15) 0.0203(17) 0.0271(17) -0.0092(14) 0.0013(13) 0.0038(13) 
O5 0.0261(16) 0.0181(17) 0.0299(18) -0.0056(14) -0.0001(13) -0.0002(13) 
O6 0.0249(16) 0.035(2) 0.0272(18) -0.0098(15) -0.0121(14) 0.0026(14) 
O7 0.0295(17) 0.0307(19) 0.0189(16) -0.0011(14) 0.0020(13) -0.0002(14) 
O8 0.036(2) 0.024(2) 0.036(2) -0.0048(18) -0.0111(16) -0.0063(19) 
S1 0.0214(6) 0.0206(6) 0.0218(6) -0.0053(5) -0.0007(5) -0.0003(5) 
 
_geom_special_details 
; 
 All esds (except the esd in the dihedral angle between two l.s. planes) 
 are estimated using the full covariance matrix.  The cell esds are taken 
 into account individually in the estimation of esds in distances, angles 
 and torsion angles; correlations between esds in cell parameters are only 
 used when they are defined by crystal symmetry.  An approximate (isotropic) 
 treatment of cell esds is used for estimating esds involving l.s. planes. 
; 
 
loop_ 
 _geom_bond_atom_site_label_1 
 _geom_bond_atom_site_label_2 
 _geom_bond_distance 
 _geom_bond_site_symmetry_2 
 _geom_bond_publ_flag 
La1 O1 2.449(3) . ? 
La1 O3 2.472(3) 1_556 ? 
La1 O6 2.487(3) 1_455 ? 
La1 O2 2.543(3) 2_665 ? 
La1 O5 2.560(3) 2_665 ? 
La1 O4 2.587(3) 2_675 ? 
La1 O8 2.617(4) . ? 
La1 O4 2.635(3) . ? 
La1 O5 2.691(3) . ? 
La1 S1 3.3050(10) . ? 
C1 C2 1.379(6) . ? 
C1 C5 1.391(6) . ? 
C1 C6 1.490(6) . ? 
C2 C3 1.372(6) . ? 
C3 N1 1.352(5) . ? 
C4 N1 1.348(6) . ? 
C4 C5 1.374(6) . ? 
C6 O1 1.247(5) . ? 
C6 O2 1.277(5) . ? 
N1 O3 1.329(4) . ? 
O2 La1 2.543(3) 2_665 ? 
O3 La1 2.472(3) 1_554 ? 
O4 S1 1.497(3) . ? 
O4 La1 2.587(3) 2_675 ? 
O5 S1 1.490(3) . ? 
O5 La1 2.560(3) 2_665 ? 
O6 S1 1.464(3) . ? 
O6 La1 2.487(3) 1_655 ? 
O7 S1 1.457(3) . ? 
 
loop_ 
 _geom_angle_atom_site_label_1 
 _geom_angle_atom_site_label_2 
 _geom_angle_atom_site_label_3 
 _geom_angle 
 _geom_angle_site_symmetry_1 
 _geom_angle_site_symmetry_3 
 _geom_angle_publ_flag 
O1 La1 O3 130.56(10) . 1_556 ? 
O1 La1 O6 76.17(10) . 1_455 ? 
O3 La1 O6 67.68(9) 1_556 1_455 ? 
O1 La1 O2 131.69(10) . 2_665 ? 
O3 La1 O2 71.63(9) 1_556 2_665 ? 
O6 La1 O2 139.11(10) 1_455 2_665 ? 
O1 La1 O5 70.98(10) . 2_665 ? 
O3 La1 O5 79.35(10) 1_556 2_665 ? 
O6 La1 O5 94.62(9) 1_455 2_665 ? 
O2 La1 O5 73.85(9) 2_665 2_665 ? 
O1 La1 O4 136.74(10) . 2_675 ? 
O3 La1 O4 79.16(9) 1_556 2_675 ? 
O6 La1 O4 93.22(9) 1_455 2_675 ? 
O2 La1 O4 82.88(9) 2_665 2_675 ? 
O5 La1 O4 152.28(9) 2_665 2_675 ? 
O1 La1 O8 66.57(11) . . ? 
O3 La1 O8 126.79(11) 1_556 . ? 
O6 La1 O8 71.68(11) 1_455 . ? 
O2 La1 O8 141.28(11) 2_665 . ? 
O5 La1 O8 137.34(11) 2_665 . ? 
O4 La1 O8 70.27(11) 2_675 . ? 
O1 La1 O4 98.94(9) . . ? 
O3 La1 O4 130.40(9) 1_556 . ? 
O6 La1 O4 140.43(9) 1_455 . ? 
O2 La1 O4 72.64(9) 2_665 . ? 
O5 La1 O4 121.32(9) 2_665 . ? 
O4 La1 O4 63.22(10) 2_675 . ? 
O8 La1 O4 70.53(11) . . ? 
O1 La1 O5 66.94(9) . . ? 
O3 La1 O5 137.88(9) 1_556 . ? 
O6 La1 O5 143.04(9) 1_455 . ? 
O2 La1 O5 71.30(9) 2_665 . ? 
O5 La1 O5 71.76(9) 2_665 . ? 
O4 La1 O5 114.99(8) 2_675 . ? 
O8 La1 O5 94.91(11) . . ? 
O4 La1 O5 52.43(8) . . ? 
O1 La1 S1 83.88(7) . . ? 
O3 La1 S1 138.97(7) 1_556 . ? 
O6 La1 S1 152.85(7) 1_455 . ? 
O2 La1 S1 68.01(7) 2_665 . ? 
O5 La1 S1 96.09(6) 2_665 . ? 
O4 La1 S1 88.78(6) 2_675 . ? 
O8 La1 S1 83.63(9) . . ? 
O4 La1 S1 26.23(6) . . ? 
O5 La1 S1 26.32(6) . . ? 
C2 C1 C5 117.3(4) . . ? 
C2 C1 C6 119.4(4) . . ? 
C5 C1 C6 123.3(4) . . ? 
C3 C2 C1 121.5(4) . . ? 
N1 C3 C2 119.2(4) . . ? 
N1 C4 C5 119.8(4) . . ? 
C4 C5 C1 120.6(4) . . ? 
O1 C6 O2 125.3(4) . . ? 
O1 C6 C1 116.0(4) . . ? 
O2 C6 C1 118.7(4) . . ? 
O3 N1 C4 119.6(3) . . ? 
O3 N1 C3 119.0(4) . . ? 
C4 N1 C3 121.4(4) . . ? 
C6 O1 La1 146.8(3) . . ? 
C6 O2 La1 131.4(3) . 2_665 ? 
N1 O3 La1 133.2(2) . 1_554 ? 
S1 O4 La1 138.24(15) . 2_675 ? 
S1 O4 La1 102.72(13) . . ? 
La1 O4 La1 116.78(10) 2_675 . ? 
S1 O5 La1 143.16(17) . 2_665 ? 
S1 O5 La1 100.49(14) . . ? 
La1 O5 La1 108.24(9) 2_665 . ? 
S1 O6 La1 145.91(18) . 1_655 ? 
O7 S1 O6 111.30(17) . . ? 
O7 S1 O5 110.71(17) . . ? 
O6 S1 O5 110.76(18) . . ? 
O7 S1 O4 110.67(17) . . ? 
O6 S1 O4 109.21(17) . . ? 
O5 S1 O4 103.94(16) . . ? 
O7 S1 La1 129.70(12) . . ? 
O6 S1 La1 118.96(13) . . ? 
O5 S1 La1 53.19(11) . . ? 
O4 S1 La1 51.06(10) . . ? 
 
_diffrn_measured_fraction_theta_max    0.997 
_diffrn_reflns_theta_full              27.48 
_diffrn_measured_fraction_theta_full   0.997 
_refine_diff_density_max    0.734 
_refine_diff_density_min   -1.108 
_refine_diff_density_rms    0.176 

#===END


## Crystallographic Data of Complex 2

data_2 
 
_audit_creation_method            SHELXL-97 
_chemical_name_systematic 
; 
 ? 
; 
_chemical_name_common             ? 
_chemical_melting_point           ? 
_chemical_formula_moiety          ? 
_chemical_formula_sum 
 'C6 H6 Ce N O8 S' 
_chemical_formula_weight          392.30 
 
loop_ 
 _atom_type_symbol 
 _atom_type_description 
 _atom_type_scat_dispersion_real 
 _atom_type_scat_dispersion_imag 
 _atom_type_scat_source 
 'C'  'C'   0.0033   0.0016 
 'International Tables Vol C Tables 4.2.6.8 and 6.1.1.4' 
 'H'  'H'   0.0000   0.0000 
 'International Tables Vol C Tables 4.2.6.8 and 6.1.1.4' 
 'N'  'N'   0.0061   0.0033 
 'International Tables Vol C Tables 4.2.6.8 and 6.1.1.4' 
 'O'  'O'   0.0106   0.0060 
 'International Tables Vol C Tables 4.2.6.8 and 6.1.1.4' 
 'S'  'S'   0.1246   0.1234 
 'International Tables Vol C Tables 4.2.6.8 and 6.1.1.4' 
 'Ce'  'Ce'  -0.2486   2.6331 
 'International Tables Vol C Tables 4.2.6.8 and 6.1.1.4' 
 
_symmetry_cell_setting            'triclinic' 
_symmetry_space_group_name_H-M    'P-1' 
 
loop_ 
 _symmetry_equiv_pos_as_xyz 
 'x, y, z' 
 '-x, -y, -z' 
 
_cell_length_a                    6.6459(2) 
_cell_length_b                    7.3040(2) 
_cell_length_c                    10.3885(3) 
_cell_angle_alpha                 77.3540(10) 
_cell_angle_beta                  87.4134(11) 
_cell_angle_gamma                 89.8783(14) 
_cell_volume                      491.53(2) 
_cell_formula_units_Z             2 
_cell_measurement_temperature     293(2) 
_cell_measurement_reflns_used     6729
_cell_measurement_theta_min        3.395
_cell_measurement_theta_max        27.485
 
_exptl_crystal_description        'flake' 
_exptl_crystal_colour             'colorless' 
_exptl_crystal_size_max           0.14 
_exptl_crystal_size_mid           0.13 
_exptl_crystal_size_min           0.05 
_exptl_crystal_density_meas       ? 
_exptl_crystal_density_diffrn     2.651 
_exptl_crystal_density_method     'not measured' 
_exptl_crystal_F_000              374 
_exptl_absorpt_coefficient_mu     4.876 
_exptl_absorpt_correction_type    empirical 
_exptl_absorpt_correction_T_min   0.641 
_exptl_absorpt_correction_T_max   0.788 
_exptl_absorpt_process_details    '(Blessing, 1995, 1997)' 
 
_exptl_special_details 
; 
 ? 
; 
 
_diffrn_ambient_temperature       293(2) 
_diffrn_radiation_wavelength      0.71073 
_diffrn_radiation_type            MoK\a 
_diffrn_radiation_source          'fine-focus sealed tube' 
_diffrn_radiation_monochromator   graphite 
_diffrn_measurement_device_type   'NONIUS KappaCCD Diffractometer' 
_diffrn_measurement_method        'CCD' 
_diffrn_detector_area_resol_mean  0.76 
_diffrn_standards_number          ? 
_diffrn_standards_interval_count  ? 
_diffrn_standards_interval_time   ? 
_diffrn_standards_decay_%         none 
_diffrn_reflns_number             9506 
_diffrn_reflns_av_R_equivalents   0.0504 
_diffrn_reflns_av_sigmaI/netI     0.0408 
_diffrn_reflns_limit_h_min        -8 
_diffrn_reflns_limit_h_max        8 
_diffrn_reflns_limit_k_min        -9 
_diffrn_reflns_limit_k_max        9 
_diffrn_reflns_limit_l_min        -13 
_diffrn_reflns_limit_l_max        13 
_diffrn_reflns_theta_min          3.59 
_diffrn_reflns_theta_max          27.49 
_reflns_number_total              2266 
_reflns_number_gt                 2099 
_reflns_threshold_expression      >2sigma(I) 
 
_computing_data_collection        'KappaCCD (Nonius B. V., 1998)' 
_computing_cell_refinement        'HKL Scalepack (Otwinowski & Minor, 1997)' 
_computing_data_reduction
'HKL Denzo (Otwinowski & Minor, 1997) & maXus (Mackay et al., 1998)'
_computing_structure_solution     'SHELXS-97 (Sheldrick, 1997)' 
_computing_structure_refinement   'SHELXL-97 (Sheldrick, 1997)' 
_computing_molecular_graphics     'Bruker SHELXTL V5.1 (Sheldrick, 1998)' 
_computing_publication_material   'SHELXL-97 (Sheldrick, 1997)' 

_publ_section_references
;
collect:
"Collect" data collection software, Nonius B.V., Delft, The Netherlands, 1998.

HKL Scalepack & HKL Denzo:
Z. Otwinowski and W. Minor, " Processing of X-ray Diffraction Data Collected
in Oscillation Mode ", Methods in Enzymology, Volume 276: Macromolecular
Crystallography, part A, p.307-326, 1997,C.W. Carter, Jr. & R.M. Sweet,
Eds., Academic Press, London.

absorption correction:
R.H. Blessing (1995) Acta Cryst. A51, 33-37.
R.H. Blessing (1997) J.Appl. Cryst. 30, 421-426.

maXus: 
S.Mackay, C.J.Gilmore, C.Edwards, M. Tremayne, N. Stuart, K.Shankland
"maXus: a computer program for the solution and refinement of crystal
structures from diffraction data", University of Glasgow, Scotland, UK,
Nonius BV, Delft, The Netherlands and MacScience Co. Ltd., Yokohama,
Japan (1998).

Sheldrick, G. M. (1998). SHELXTL Version 5.1. Bruker Analytical X-ray
Instruments Inc., Madison, Wisconsin, USA.

Sheldrick, G. M. (1997). SHELX-97. PC Version. University of Goettingen,
Germany.
;
 
_refine_special_details 
; 
 Refinement of F^2^ against ALL reflections.  The weighted R-factor wR and 
 goodness of fit S are based on F^2^, conventional R-factors R are based 
 on F, with F set to zero for negative F^2^. The threshold expression of 
 F^2^ > 2sigma(F^2^) is used only for calculating R-factors(gt) etc. and is 
 not relevant to the choice of reflections for refinement.  R-factors based 
 on F^2^ are statistically about twice as large as those based on F, and R- 
 factors based on ALL data will be even larger. 
; 
 
_refine_ls_structure_factor_coef  Fsqd  
_refine_ls_matrix_type            full 
_refine_ls_weighting_scheme       calc  
_refine_ls_weighting_details 
 'calc w=1/[\s^2^(Fo^2^)+(0.0370P)^2^+0.0000P] where P=(Fo^2^+2Fc^2^)/3' 
_atom_sites_solution_primary      direct 
_atom_sites_solution_secondary    difmap 
_atom_sites_solution_hydrogens    geom 
_refine_ls_hydrogen_treatment     mixed 
_refine_ls_extinction_method      SHELXL 
_refine_ls_extinction_coef        0.0134(13) 
_refine_ls_extinction_expression 
 'Fc^*^=kFc[1+0.001xFc^2^\l^3^/sin(2\q)]^-1/4^' 
_refine_ls_number_reflns          2266 
_refine_ls_number_parameters      163 
_refine_ls_number_restraints      0 
_refine_ls_R_factor_all           0.0310 
_refine_ls_R_factor_gt            0.0272 
_refine_ls_wR_factor_ref          0.0630 
_refine_ls_wR_factor_gt           0.0621 
_refine_ls_goodness_of_fit_ref    1.063 
_refine_ls_restrained_S_all       1.063 
_refine_ls_shift/su_max           0.001 
_refine_ls_shift/su_mean          0.000 
 
loop_ 
 _atom_site_label 
 _atom_site_type_symbol 
 _atom_site_fract_x 
 _atom_site_fract_y 
 _atom_site_fract_z 
 _atom_site_U_iso_or_equiv 
 _atom_site_adp_type 
 _atom_site_occupancy 
 _atom_site_symmetry_multiplicity 
 _atom_site_calc_flag 
 _atom_site_refinement_flags 
 _atom_site_disorder_assembly 
 _atom_site_disorder_group 
Ce1 Ce 0.32701(3) 0.73737(2) 0.016512(18) 0.01253(11) Uani 1 1 d . . . 
C1 C 0.2830(5) 0.5373(5) -0.3840(4) 0.0169(7) Uani 1 1 d . . . 
C2 C 0.2628(6) 0.7241(5) -0.4466(4) 0.0217(8) Uani 1 1 d . . . 
H2A H 0.2760 0.8175 -0.3994 0.026 Uiso 1 1 calc R . . 
C3 C 0.2233(6) 0.7716(5) -0.5789(4) 0.0239(8) Uani 1 1 d . . . 
H3A H 0.2149 0.8972 -0.6216 0.029 Uiso 1 1 calc R . . 
C4 C 0.2181(5) 0.4539(5) -0.5880(4) 0.0206(8) Uani 1 1 d . . . 
H4A H 0.2017 0.3622 -0.6363 0.025 Uiso 1 1 calc R . . 
C5 C 0.2634(5) 0.4029(5) -0.4581(4) 0.0179(7) Uani 1 1 d . . . 
H5A H 0.2812 0.2769 -0.4191 0.021 Uiso 1 1 calc R . . 
C6 C 0.3284(5) 0.4907(5) -0.2391(3) 0.0150(7) Uani 1 1 d . . . 
N1 N 0.1969(5) 0.6364(4) -0.6464(3) 0.0192(7) Uani 1 1 d . . . 
O1 O 0.2730(4) 0.6078(4) -0.1749(3) 0.0221(6) Uani 1 1 d . . . 
O2 O 0.4245(4) 0.3412(4) -0.1961(2) 0.0187(5) Uani 1 1 d . . . 
O3 O 0.1412(4) 0.6841(4) -0.7703(2) 0.0240(6) Uani 1 1 d . . . 
O4 O 0.6548(4) 0.9343(3) -0.0658(3) 0.0179(5) Uani 1 1 d . . . 
O5 O 0.6669(4) 0.6186(3) -0.0845(3) 0.0180(5) Uani 1 1 d . . . 
O6 O 0.9569(4) 0.7574(4) -0.0072(3) 0.0218(6) Uani 1 1 d . . . 
O7 O 0.8753(4) 0.8487(4) -0.2356(2) 0.0191(5) Uani 1 1 d . . . 
O8 O 0.2602(5) 0.9896(4) -0.1958(3) 0.0272(7) Uani 1 1 d . . . 
S1 S 0.79663(13) 0.78961(12) -0.10064(8) 0.01375(19) Uani 1 1 d . . . 
HW1 H 0.287(9) 1.090(9) -0.183(6) 0.06(2) Uiso 1 1 d . . . 
HW2 H 0.156(10) 0.993(9) -0.211(7) 0.06(2) Uiso 1 1 d . . . 
 
loop_ 
 _atom_site_aniso_label 
 _atom_site_aniso_U_11 
 _atom_site_aniso_U_22 
 _atom_site_aniso_U_33 
 _atom_site_aniso_U_23 
 _atom_site_aniso_U_13 
 _atom_site_aniso_U_12 
Ce1 0.01356(14) 0.01123(14) 0.01335(14) -0.00384(8) -0.00076(8) 0.00046(8) 
C1 0.0149(17) 0.0193(18) 0.0161(17) -0.0029(14) 0.0001(14) 0.0006(14) 
C2 0.027(2) 0.0182(19) 0.0203(19) -0.0049(15) -0.0047(17) 0.0014(15) 
C3 0.032(2) 0.0160(19) 0.023(2) -0.0021(15) -0.0037(18) 0.0007(16) 
C4 0.0222(19) 0.023(2) 0.0183(18) -0.0073(16) -0.0024(16) -0.0018(15) 
C5 0.0182(17) 0.0163(18) 0.0191(18) -0.0045(15) 0.0012(15) -0.0001(14) 
C6 0.0137(16) 0.0142(17) 0.0167(17) -0.0024(14) 0.0000(14) -0.0019(13) 
N1 0.0190(15) 0.0256(17) 0.0126(15) -0.0033(13) -0.0011(13) 0.0004(13) 
O1 0.0291(14) 0.0210(14) 0.0194(13) -0.0105(11) -0.0052(11) 0.0060(11) 
O2 0.0218(13) 0.0159(13) 0.0190(13) -0.0042(10) -0.0043(11) 0.0019(10) 
O3 0.0237(14) 0.0346(16) 0.0130(13) -0.0029(11) -0.0029(11) 0.0000(12) 
O4 0.0179(12) 0.0145(12) 0.0231(13) -0.0084(10) 0.0010(11) 0.0018(10) 
O5 0.0213(13) 0.0118(12) 0.0220(13) -0.0061(10) 0.0003(11) -0.0021(10) 
O6 0.0145(12) 0.0283(15) 0.0236(14) -0.0068(12) -0.0050(11) 0.0012(11) 
O7 0.0212(13) 0.0186(13) 0.0167(13) -0.0026(11) 0.0020(11) 0.0000(11) 
O8 0.0318(19) 0.0189(16) 0.0299(16) -0.0017(12) -0.0089(14) -0.0056(13) 
S1 0.0136(4) 0.0125(4) 0.0154(4) -0.0040(3) 0.0002(3) 0.0004(3) 
 
_geom_special_details 
; 
 All esds (except the esd in the dihedral angle between two l.s. planes) 
 are estimated using the full covariance matrix.  The cell esds are taken 
 into account individually in the estimation of esds in distances, angles 
 and torsion angles; correlations between esds in cell parameters are only 
 used when they are defined by crystal symmetry.  An approximate (isotropic) 
 treatment of cell esds is used for estimating esds involving l.s. planes. 
; 
 
loop_ 
 _geom_bond_atom_site_label_1 
 _geom_bond_atom_site_label_2 
 _geom_bond_distance 
 _geom_bond_site_symmetry_2 
 _geom_bond_publ_flag 
Ce1 O1 2.423(2) . ? 
Ce1 O3 2.441(2) 1_556 ? 
Ce1 O6 2.484(3) 1_455 ? 
Ce1 O2 2.519(3) 2_665 ? 
Ce1 O5 2.541(2) 2_665 ? 
Ce1 O4 2.564(2) 2_675 ? 
Ce1 O8 2.600(3) . ? 
Ce1 O4 2.618(2) . ? 
Ce1 O5 2.671(2) . ? 
Ce1 S1 3.2904(8) . ? 
C1 C5 1.383(5) . ? 
C1 C2 1.386(5) . ? 
C1 C6 1.513(5) . ? 
C2 C3 1.379(6) . ? 
C3 N1 1.346(5) . ? 
C4 N1 1.349(5) . ? 
C4 C5 1.366(5) . ? 
C6 O1 1.240(4) . ? 
C6 O2 1.268(4) . ? 
N1 O3 1.326(4) . ? 
O2 Ce1 2.519(2) 2_665 ? 
O3 Ce1 2.441(2) 1_554 ? 
O4 S1 1.506(2) . ? 
O4 Ce1 2.564(2) 2_675 ? 
O5 S1 1.494(2) . ? 
O5 Ce1 2.541(2) 2_665 ? 
O6 S1 1.457(3) . ? 
O6 Ce1 2.484(3) 1_655 ? 
O7 S1 1.448(3) . ? 
 
loop_ 
 _geom_angle_atom_site_label_1 
 _geom_angle_atom_site_label_2 
 _geom_angle_atom_site_label_3 
 _geom_angle 
 _geom_angle_site_symmetry_1 
 _geom_angle_site_symmetry_3 
 _geom_angle_publ_flag 
O1 Ce1 O3 130.04(9) . 1_556 ? 
O1 Ce1 O6 76.04(9) . 1_455 ? 
O3 Ce1 O6 67.75(9) 1_556 1_455 ? 
O1 Ce1 O2 131.95(8) . 2_665 ? 
O3 Ce1 O2 71.59(8) 1_556 2_665 ? 
O6 Ce1 O2 139.21(9) 1_455 2_665 ? 
O1 Ce1 O5 70.91(9) . 2_665 ? 
O3 Ce1 O5 79.06(8) 1_556 2_665 ? 
O6 Ce1 O5 95.06(8) 1_455 2_665 ? 
O2 Ce1 O5 73.90(8) 2_665 2_665 ? 
O1 Ce1 O4 136.46(9) . 2_675 ? 
O3 Ce1 O4 79.43(9) 1_556 2_675 ? 
O6 Ce1 O4 92.30(8) 1_455 2_675 ? 
O2 Ce1 O4 83.34(8) 2_665 2_675 ? 
O5 Ce1 O4 152.61(9) 2_665 2_675 ? 
O1 Ce1 O8 66.31(10) . . ? 
O3 Ce1 O8 127.89(10) 1_556 . ? 
O6 Ce1 O8 72.19(10) 1_455 . ? 
O2 Ce1 O8 140.75(10) 2_665 . ? 
O5 Ce1 O8 137.11(10) 2_665 . ? 
O4 Ce1 O8 70.18(10) 2_675 . ? 
O1 Ce1 O4 99.80(8) . . ? 
O3 Ce1 O4 130.06(9) 1_556 . ? 
O6 Ce1 O4 139.97(9) 1_455 . ? 
O2 Ce1 O4 72.40(8) 2_665 . ? 
O5 Ce1 O4 121.64(8) 2_665 . ? 
O4 Ce1 O4 63.03(9) 2_675 . ? 
O8 Ce1 O4 69.93(10) . . ? 
O1 Ce1 O5 67.24(8) . . ? 
O3 Ce1 O5 137.70(9) 1_556 . ? 
O6 Ce1 O5 143.24(9) 1_455 . ? 
O2 Ce1 O5 71.33(8) 2_665 . ? 
O5 Ce1 O5 71.74(9) 2_665 . ? 
O4 Ce1 O5 115.39(8) 2_675 . ? 
O8 Ce1 O5 94.01(9) . . ? 
O4 Ce1 O5 52.92(7) . . ? 
O1 Ce1 S1 84.55(6) . . ? 
O3 Ce1 S1 138.68(7) 1_556 . ? 
O6 Ce1 S1 152.99(7) 1_455 . ? 
O2 Ce1 S1 67.72(6) 2_665 . ? 
O5 Ce1 S1 96.13(6) 2_665 . ? 
O4 Ce1 S1 88.96(6) 2_675 . ? 
O8 Ce1 S1 82.94(8) . . ? 
O4 Ce1 S1 26.54(5) . . ? 
O5 Ce1 S1 26.51(5) . . ? 
C5 C1 C2 118.1(3) . . ? 
C5 C1 C6 123.3(3) . . ? 
C2 C1 C6 118.6(3) . . ? 
C3 C2 C1 120.1(4) . . ? 
N1 C3 C2 120.1(4) . . ? 
N1 C4 C5 120.3(3) . . ? 
C4 C5 C1 120.5(4) . . ? 
O1 C6 O2 126.4(3) . . ? 
O1 C6 C1 115.9(3) . . ? 
O2 C6 C1 117.7(3) . . ? 
O3 N1 C3 119.2(3) . . ? 
O3 N1 C4 120.0(3) . . ? 
C3 N1 C4 120.8(3) . . ? 
C6 O1 Ce1 146.0(2) . . ? 
C6 O2 Ce1 131.0(2) . 2_665 ? 
N1 O3 Ce1 133.2(2) . 1_554 ? 
S1 O4 Ce1 138.46(14) . 2_675 ? 
S1 O4 Ce1 102.49(12) . . ? 
Ce1 O4 Ce1 116.97(9) 2_675 . ? 
S1 O5 Ce1 142.69(15) . 2_665 ? 
S1 O5 Ce1 100.55(11) . . ? 
Ce1 O5 Ce1 108.26(9) 2_665 . ? 
S1 O6 Ce1 145.05(16) . 1_655 ? 
O7 S1 O6 111.86(16) . . ? 
O7 S1 O5 110.82(15) . . ? 
O6 S1 O5 110.66(16) . . ? 
O7 S1 O4 110.58(15) . . ? 
O6 S1 O4 109.03(15) . . ? 
O5 S1 O4 103.57(14) . . ? 
O7 S1 Ce1 129.79(11) . . ? 
O6 S1 Ce1 118.31(11) . . ? 
O5 S1 Ce1 52.94(9) . . ? 
O4 S1 Ce1 50.97(10) . . ? 
 
_diffrn_measured_fraction_theta_max    0.996 
_diffrn_reflns_theta_full              27.49 
_diffrn_measured_fraction_theta_full   0.996 
_refine_diff_density_max    1.104 
_refine_diff_density_min   -1.565 
_refine_diff_density_rms    0.207 

#===END


## Crystallographic Data of Complex 3

data_3 
 
_audit_creation_method            SHELXL-97 
_chemical_name_systematic 
; 
 ? 
; 
_chemical_name_common             ? 
_chemical_melting_point           ? 
_chemical_formula_moiety          ? 
_chemical_formula_sum 
 'C6 H6 N O8 Pr S' 
_chemical_formula_weight          393.09 
 
loop_ 
 _atom_type_symbol 
 _atom_type_description 
 _atom_type_scat_dispersion_real 
 _atom_type_scat_dispersion_imag 
 _atom_type_scat_source 
 'C'  'C'   0.0033   0.0016 
 'International Tables Vol C Tables 4.2.6.8 and 6.1.1.4' 
 'H'  'H'   0.0000   0.0000 
 'International Tables Vol C Tables 4.2.6.8 and 6.1.1.4' 
 'N'  'N'   0.0061   0.0033 
 'International Tables Vol C Tables 4.2.6.8 and 6.1.1.4' 
 'O'  'O'   0.0106   0.0060 
 'International Tables Vol C Tables 4.2.6.8 and 6.1.1.4' 
 'S'  'S'   0.1246   0.1234 
 'International Tables Vol C Tables 4.2.6.8 and 6.1.1.4' 
 'Pr'  'Pr'  -0.2180   2.8214 
 'International Tables Vol C Tables 4.2.6.8 and 6.1.1.4' 
 
_symmetry_cell_setting            'triclinic'
_symmetry_space_group_name_H-M    'P-1' 
 
loop_ 
 _symmetry_equiv_pos_as_xyz 
 'x, y, z' 
 '-x, -y, -z' 
 
_cell_length_a                    6.6182(2) 
_cell_length_b                    7.2788(2) 
_cell_length_c                    10.3611(3) 
_cell_angle_alpha                 77.3539(13) 
_cell_angle_beta                  87.3002(12) 
_cell_angle_gamma                 90.0259(15) 
_cell_volume                      486.44(2) 
_cell_formula_units_Z             2 
_cell_measurement_temperature     293(2) 
_cell_measurement_reflns_used     5738
_cell_measurement_theta_min        3.60
_cell_measurement_theta_max        27.48
 
_exptl_crystal_description        'flake' 
_exptl_crystal_colour             'light green' 
_exptl_crystal_size_max           0.16 
_exptl_crystal_size_mid           0.10
_exptl_crystal_size_min           0.02 
_exptl_crystal_density_meas       ? 
_exptl_crystal_density_diffrn     2.684 
_exptl_crystal_density_method     'not measured' 
_exptl_crystal_F_000              376 
_exptl_absorpt_coefficient_mu     5.256 
_exptl_absorpt_correction_type    empirical 
_exptl_absorpt_correction_T_min   0.669 
_exptl_absorpt_correction_T_max   0.997 
_exptl_absorpt_process_details    '(Blessing, 1995, 1997)' 
 
_exptl_special_details 
; 
 ? 
; 
 
_diffrn_ambient_temperature       293(2) 
_diffrn_radiation_wavelength      0.71073 
_diffrn_radiation_type            MoK\a 
_diffrn_radiation_source          'fine-focus sealed tube' 
_diffrn_radiation_monochromator   graphite 
_diffrn_measurement_device_type   'NONIUS KappaCCD Diffractometer' 
_diffrn_measurement_method        'CCD' 
_diffrn_detector_area_resol_mean  0.76 
_diffrn_standards_number          ? 
_diffrn_standards_interval_count  ? 
_diffrn_standards_interval_time   ? 
_diffrn_standards_decay_%         none 
_diffrn_reflns_number             9677 
_diffrn_reflns_av_R_equivalents   0.0816 
_diffrn_reflns_av_sigmaI/netI     0.0652 
_diffrn_reflns_limit_h_min        -8 
_diffrn_reflns_limit_h_max        8 
_diffrn_reflns_limit_k_min        -9 
_diffrn_reflns_limit_k_max        9 
_diffrn_reflns_limit_l_min        -13 
_diffrn_reflns_limit_l_max        13 
_diffrn_reflns_theta_min          3.60 
_diffrn_reflns_theta_max          27.48 
_reflns_number_total              2231 
_reflns_number_gt                 1939 
_reflns_threshold_expression      >2sigma(I) 
 
_computing_data_collection        'KappaCCD (Nonius B. V., 1998)' 
_computing_cell_refinement        'HKL Scalepack (Otwinowski & Minor, 1997)' 
_computing_data_reduction
'HKL Denzo (Otwinowski & Minor, 1997) & maXus (Mackay et al., 1998)'
_computing_structure_solution     'SHELXS-97 (Sheldrick, 1997)' 
_computing_structure_refinement   'SHELXL-97 (Sheldrick, 1997)' 
_computing_molecular_graphics     'Bruker SHELXTL V5.1 (Sheldrick, 1998)' 
_computing_publication_material   'SHELXL-97 (Sheldrick, 1997)' 

_publ_section_references
;
collect:
"Collect" data collection software, Nonius B.V., Delft, The Netherlands, 1998.

HKL Scalepack & HKL Denzo:
Z. Otwinowski and W. Minor, " Processing of X-ray Diffraction Data Collected
in Oscillation Mode ", Methods in Enzymology, Volume 276: Macromolecular
Crystallography, part A, p.307-326, 1997,C.W. Carter, Jr. & R.M. Sweet,
Eds., Academic Press, London.

absorption correction:
R.H. Blessing (1995) Acta Cryst. A51, 33-37.
R.H. Blessing (1997) J.Appl. Cryst. 30, 421-426.

maXus: 
S.Mackay, C.J.Gilmore, C.Edwards, M. Tremayne, N. Stuart, K.Shankland
"maXus: a computer program for the solution and refinement of crystal
structures from diffraction data", University of Glasgow, Scotland, UK,
Nonius BV, Delft, The Netherlands and MacScience Co. Ltd., Yokohama,
Japan (1998).

Sheldrick, G. M. (1998). SHELXTL Version 5.1. Bruker Analytical X-ray
Instruments Inc., Madison, Wisconsin, USA.

Sheldrick, G. M. (1997). SHELX-97. PC Version. University of Goettingen,
Germany.
;
 
_refine_special_details 
; 
 Refinement of F^2^ against ALL reflections.  The weighted R-factor wR and 
 goodness of fit S are based on F^2^, conventional R-factors R are based 
 on F, with F set to zero for negative F^2^. The threshold expression of 
 F^2^ > 2sigma(F^2^) is used only for calculating R-factors(gt) etc. and is 
 not relevant to the choice of reflections for refinement.  R-factors based 
 on F^2^ are statistically about twice as large as those based on F, and R- 
 factors based on ALL data will be even larger. 
; 
 
_refine_ls_structure_factor_coef  Fsqd  
_refine_ls_matrix_type            full 
_refine_ls_weighting_scheme       calc  
_refine_ls_weighting_details 
 'calc w=1/[\s^2^(Fo^2^)+(0.0439P)^2^+0.0000P] where P=(Fo^2^+2Fc^2^)/3' 
_atom_sites_solution_primary      direct 
_atom_sites_solution_secondary    difmap 
_atom_sites_solution_hydrogens    geom 
_refine_ls_hydrogen_treatment     mixed 
_refine_ls_extinction_method      SHELXL 
_refine_ls_extinction_coef        0.065(3) 
_refine_ls_extinction_expression 
 'Fc^*^=kFc[1+0.001xFc^2^\l^3^/sin(2\q)]^-1/4^' 
_refine_ls_number_reflns          2231 
_refine_ls_number_parameters      163 
_refine_ls_number_restraints      0 
_refine_ls_R_factor_all           0.0449 
_refine_ls_R_factor_gt            0.0369 
_refine_ls_wR_factor_ref          0.0805 
_refine_ls_wR_factor_gt           0.0784 
_refine_ls_goodness_of_fit_ref    1.022 
_refine_ls_restrained_S_all       1.022 
_refine_ls_shift/su_max           0.000 
_refine_ls_shift/su_mean          0.000 
 
loop_ 
 _atom_site_label 
 _atom_site_type_symbol 
 _atom_site_fract_x 
 _atom_site_fract_y 
 _atom_site_fract_z 
 _atom_site_U_iso_or_equiv 
 _atom_site_adp_type 
 _atom_site_occupancy 
 _atom_site_symmetry_multiplicity 
 _atom_site_calc_flag 
 _atom_site_refinement_flags 
 _atom_site_disorder_assembly 
 _atom_site_disorder_group 
Pr1 Pr 0.32819(4) 0.73704(4) 0.01653(3) 0.01442(16) Uani 1 1 d . . . 
C1 C 0.2840(8) 0.5375(8) -0.3836(5) 0.0178(11) Uani 1 1 d . . . 
C2 C 0.2647(9) 0.7246(8) -0.4469(6) 0.0239(12) Uani 1 1 d . . . 
H2A H 0.2772 0.8185 -0.3996 0.029 Uiso 1 1 calc R . . 
C3 C 0.2274(9) 0.7719(8) -0.5789(6) 0.0244(13) Uani 1 1 d . . . 
H3A H 0.2227 0.8980 -0.6220 0.029 Uiso 1 1 calc R . . 
C4 C 0.2173(8) 0.4532(8) -0.5889(6) 0.0225(12) Uani 1 1 d . . . 
H4A H 0.2002 0.3614 -0.6374 0.027 Uiso 1 1 calc R . . 
C5 C 0.2633(8) 0.4017(8) -0.4578(6) 0.0205(12) Uani 1 1 d . . . 
H5A H 0.2807 0.2753 -0.4187 0.025 Uiso 1 1 calc R . . 
C6 C 0.3285(8) 0.4911(8) -0.2380(6) 0.0176(11) Uani 1 1 d . . . 
N1 N 0.1972(7) 0.6356(7) -0.6469(5) 0.0200(10) Uani 1 1 d . . . 
O1 O 0.2723(6) 0.6086(5) -0.1745(4) 0.0211(8) Uani 1 1 d . . . 
O2 O 0.4253(5) 0.3408(5) -0.1951(4) 0.0191(8) Uani 1 1 d . . . 
O3 O 0.1425(6) 0.6826(6) -0.7711(4) 0.0244(9) Uani 1 1 d . . . 
O4 O 0.6560(5) 0.9344(5) -0.0654(4) 0.0193(8) Uani 1 1 d . . . 
O5 O 0.6663(5) 0.6180(5) -0.0843(4) 0.0190(8) Uani 1 1 d . . . 
O6 O 0.9591(5) 0.7565(6) -0.0072(4) 0.0222(8) Uani 1 1 d . . . 
O7 O 0.8780(5) 0.8488(5) -0.2352(4) 0.0196(8) Uani 1 1 d . . . 
O8 O 0.2647(8) 0.9871(7) -0.1955(5) 0.0269(11) Uani 1 1 d . . . 
S1 S 0.79795(18) 0.78952(18) -0.09991(13) 0.0149(3) Uani 1 1 d . . . 
HW1 H 0.276(12) 1.069(12) -0.171(8) 0.05(3) Uiso 1 1 d . . . 
HW2 H 0.183(11) 0.983(11) -0.220(7) 0.02(2) Uiso 1 1 d . . . 
 
loop_ 
 _atom_site_aniso_label 
 _atom_site_aniso_U_11 
 _atom_site_aniso_U_22 
 _atom_site_aniso_U_33 
 _atom_site_aniso_U_23 
 _atom_site_aniso_U_13 
 _atom_site_aniso_U_12 
Pr1 0.01409(19) 0.0138(2) 0.0160(2) -0.00467(12) -0.00049(11) -0.00034(11) 
C1 0.015(2) 0.021(3) 0.019(3) -0.008(2) 0.000(2) 0.001(2) 
C2 0.026(3) 0.025(3) 0.021(3) -0.006(3) -0.003(2) -0.001(2) 
C3 0.028(3) 0.019(3) 0.027(3) -0.007(3) -0.004(3) -0.001(2) 
C4 0.019(3) 0.028(3) 0.021(3) -0.007(3) 0.000(2) 0.000(2) 
C5 0.018(3) 0.020(3) 0.024(3) -0.005(2) 0.001(2) 0.002(2) 
C6 0.013(2) 0.019(3) 0.021(3) -0.005(2) -0.004(2) -0.003(2) 
N1 0.017(2) 0.025(3) 0.018(2) -0.004(2) -0.0009(19) 0.0002(19) 
O1 0.027(2) 0.020(2) 0.019(2) -0.0092(17) -0.0050(16) 0.0046(16) 
O2 0.0198(18) 0.0174(19) 0.021(2) -0.0065(17) -0.0021(16) 0.0014(15) 
O3 0.023(2) 0.034(2) 0.015(2) -0.0035(18) -0.0026(16) 0.0016(18) 
O4 0.0153(17) 0.0191(19) 0.025(2) -0.0097(17) 0.0019(16) 0.0012(15) 
O5 0.0230(19) 0.0126(18) 0.022(2) -0.0043(16) -0.0013(16) -0.0037(15) 
O6 0.0157(17) 0.026(2) 0.026(2) -0.0080(18) -0.0025(16) 0.0010(16) 
O7 0.0210(18) 0.020(2) 0.017(2) -0.0026(16) 0.0011(16) -0.0010(16) 
O8 0.029(3) 0.018(2) 0.034(3) -0.005(2) -0.012(2) -0.007(2) 
S1 0.0140(6) 0.0149(6) 0.0163(7) -0.0049(5) -0.0004(5) -0.0012(5) 
 
_geom_special_details 
; 
 All esds (except the esd in the dihedral angle between two l.s. planes) 
 are estimated using the full covariance matrix.  The cell esds are taken 
 into account individually in the estimation of esds in distances, angles 
 and torsion angles; correlations between esds in cell parameters are only 
 used when they are defined by crystal symmetry.  An approximate (isotropic) 
 treatment of cell esds is used for estimating esds involving l.s. planes. 
; 
 
loop_ 
 _geom_bond_atom_site_label_1 
 _geom_bond_atom_site_label_2 
 _geom_bond_distance 
 _geom_bond_site_symmetry_2 
 _geom_bond_publ_flag 
Pr1 O1 2.410(4) . ? 
Pr1 O3 2.423(4) 1_556 ? 
Pr1 O6 2.468(4) 1_455 ? 
Pr1 O2 2.496(4) 2_665 ? 
Pr1 O5 2.526(4) 2_665 ? 
Pr1 O4 2.553(3) 2_675 ? 
Pr1 O8 2.579(5) . ? 
Pr1 O4 2.604(4) . ? 
Pr1 O5 2.651(3) . ? 
Pr1 S1 3.2727(12) . ? 
C1 C2 1.385(8) . ? 
C1 C5 1.388(7) . ? 
C1 C6 1.515(8) . ? 
C2 C3 1.369(9) . ? 
C3 N1 1.357(7) . ? 
C4 N1 1.342(7) . ? 
C4 C5 1.377(8) . ? 
C6 O1 1.235(6) . ? 
C6 O2 1.273(6) . ? 
N1 O3 1.324(6) . ? 
O2 Pr1 2.496(4) 2_665 ? 
O3 Pr1 2.423(4) 1_554 ? 
O4 S1 1.503(3) . ? 
O4 Pr1 2.553(3) 2_675 ? 
O5 S1 1.497(4) . ? 
O5 Pr1 2.526(4) 2_665 ? 
O6 S1 1.453(4) . ? 
O6 Pr1 2.468(4) 1_655 ? 
O7 S1 1.448(4) . ? 
 
loop_ 
 _geom_angle_atom_site_label_1 
 _geom_angle_atom_site_label_2 
 _geom_angle_atom_site_label_3 
 _geom_angle 
 _geom_angle_site_symmetry_1 
 _geom_angle_site_symmetry_3 
 _geom_angle_publ_flag 
O1 Pr1 O3 129.74(13) . 1_556 ? 
O1 Pr1 O6 75.60(12) . 1_455 ? 
O3 Pr1 O6 67.86(13) 1_556 1_455 ? 
O1 Pr1 O2 132.35(12) . 2_665 ? 
O3 Pr1 O2 71.50(12) 1_556 2_665 ? 
O6 Pr1 O2 139.24(13) 1_455 2_665 ? 
O1 Pr1 O5 71.09(13) . 2_665 ? 
O3 Pr1 O5 78.89(13) 1_556 2_665 ? 
O6 Pr1 O5 95.07(12) 1_455 2_665 ? 
O2 Pr1 O5 73.90(12) 2_665 2_665 ? 
O1 Pr1 O4 136.10(13) . 2_675 ? 
O3 Pr1 O4 79.49(13) 1_556 2_675 ? 
O6 Pr1 O4 91.93(12) 1_455 2_675 ? 
O2 Pr1 O4 83.65(12) 2_665 2_675 ? 
O5 Pr1 O4 152.76(13) 2_665 2_675 ? 
O1 Pr1 O8 65.88(15) . . ? 
O3 Pr1 O8 128.46(14) 1_556 . ? 
O6 Pr1 O8 72.46(16) 1_455 . ? 
O2 Pr1 O8 140.63(16) 2_665 . ? 
O5 Pr1 O8 136.90(16) 2_665 . ? 
O4 Pr1 O8 70.23(15) 2_675 . ? 
O1 Pr1 O4 100.11(12) . . ? 
O3 Pr1 O4 130.07(12) 1_556 . ? 
O6 Pr1 O4 139.92(13) 1_455 . ? 
O2 Pr1 O4 72.40(12) 2_665 . ? 
O5 Pr1 O4 121.69(11) 2_665 . ? 
O4 Pr1 O4 63.25(12) 2_675 . ? 
O8 Pr1 O4 69.70(15) . . ? 
O1 Pr1 O5 67.45(12) . . ? 
O3 Pr1 O5 137.55(13) 1_556 . ? 
O6 Pr1 O5 143.00(12) 1_455 . ? 
O2 Pr1 O5 71.47(12) 2_665 . ? 
O5 Pr1 O5 71.54(13) 2_665 . ? 
O4 Pr1 O5 115.96(11) 2_675 . ? 
O8 Pr1 O5 93.64(14) . . ? 
O4 Pr1 O5 53.23(11) . . ? 
O1 Pr1 S1 84.95(9) . . ? 
O3 Pr1 S1 138.55(10) 1_556 . ? 
O6 Pr1 S1 153.04(10) 1_455 . ? 
O2 Pr1 S1 67.65(9) 2_665 . ? 
O5 Pr1 S1 96.07(8) 2_665 . ? 
O4 Pr1 S1 89.29(8) 2_675 . ? 
O8 Pr1 S1 82.68(12) . . ? 
O4 Pr1 S1 26.65(8) . . ? 
O5 Pr1 S1 26.73(8) . . ? 
C2 C1 C5 118.0(5) . . ? 
C2 C1 C6 118.7(5) . . ? 
C5 C1 C6 123.3(5) . . ? 
C3 C2 C1 120.3(5) . . ? 
N1 C3 C2 120.3(6) . . ? 
N1 C4 C5 120.2(5) . . ? 
C4 C5 C1 120.3(5) . . ? 
O1 C6 O2 126.9(5) . . ? 
O1 C6 C1 115.7(5) . . ? 
O2 C6 C1 117.4(4) . . ? 
O3 N1 C4 119.5(5) . . ? 
O3 N1 C3 119.7(5) . . ? 
C4 N1 C3 120.7(5) . . ? 
C6 O1 Pr1 145.2(4) . . ? 
C6 O2 Pr1 130.9(3) . 2_665 ? 
N1 O3 Pr1 133.5(3) . 1_554 ? 
S1 O4 Pr1 138.9(2) . 2_675 ? 
S1 O4 Pr1 102.34(18) . . ? 
Pr1 O4 Pr1 116.75(12) 2_675 . ? 
S1 O5 Pr1 142.4(2) . 2_665 ? 
S1 O5 Pr1 100.49(17) . . ? 
Pr1 O5 Pr1 108.46(13) 2_665 . ? 
S1 O6 Pr1 145.5(2) . 1_655 ? 
O7 S1 O6 111.4(2) . . ? 
O7 S1 O5 110.7(2) . . ? 
O6 S1 O5 110.9(2) . . ? 
O7 S1 O4 110.5(2) . . ? 
O6 S1 O4 109.6(2) . . ? 
O5 S1 O4 103.4(2) . . ? 
O7 S1 Pr1 129.83(17) . . ? 
O6 S1 Pr1 118.76(17) . . ? 
O5 S1 Pr1 52.78(14) . . ? 
O4 S1 Pr1 51.01(14) . . ? 
 
loop_ 
 _geom_hbond_atom_site_label_D 
 _geom_hbond_atom_site_label_H 
 _geom_hbond_atom_site_label_A 
 _geom_hbond_distance_DH 
 _geom_hbond_distance_HA 
 _geom_hbond_distance_DA 
 _geom_hbond_angle_DHA 
 _geom_hbond_site_symmetry_A 
O8 HW1 O2  0.70(8) 2.17(8) 2.786(6) 147(8) 1_565 
O8 HW2 O7  0.61(7) 2.27(7) 2.831(7) 154(9) 1_455 
C3 H3A O7  0.93 2.22 3.102(7) 157.9 2_674 
C4 H4A O7  0.93 2.30 3.227(7) 173.2 2_664 
 
_diffrn_measured_fraction_theta_max    0.997 
_diffrn_reflns_theta_full              27.48 
_diffrn_measured_fraction_theta_full   0.997 
_refine_diff_density_max    1.576 
_refine_diff_density_min   -2.300 
_refine_diff_density_rms    0.267 

#===END


## Crystallographic Data of Complex 4

data_4 
 
_audit_creation_method            SHELXL-97 
_chemical_name_systematic 
; 
 ? 
; 
_chemical_name_common             ? 
_chemical_melting_point           ? 
_chemical_formula_moiety          ? 
_chemical_formula_sum 
 'C6 H6 N Nd O8 S' 
_chemical_formula_weight          396.42 
 
loop_ 
 _atom_type_symbol 
 _atom_type_description 
 _atom_type_scat_dispersion_real 
 _atom_type_scat_dispersion_imag 
 _atom_type_scat_source 
 'C'  'C'   0.0033   0.0016 
 'International Tables Vol C Tables 4.2.6.8 and 6.1.1.4' 
 'H'  'H'   0.0000   0.0000 
 'International Tables Vol C Tables 4.2.6.8 and 6.1.1.4' 
 'N'  'N'   0.0061   0.0033 
 'International Tables Vol C Tables 4.2.6.8 and 6.1.1.4' 
 'O'  'O'   0.0106   0.0060 
 'International Tables Vol C Tables 4.2.6.8 and 6.1.1.4' 
 'Nd'  'Nd'  -0.1943   3.0179 
 'International Tables Vol C Tables 4.2.6.8 and 6.1.1.4' 
 'S'  'S'   0.1246   0.1234 
 'International Tables Vol C Tables 4.2.6.8 and 6.1.1.4' 
 
_symmetry_cell_setting            'monoclinic' 
_symmetry_space_group_name_H-M    'P21/c' 
 
loop_ 
 _symmetry_equiv_pos_as_xyz 
 'x, y, z' 
 '-x, y+1/2, -z+1/2' 
 '-x, -y, -z' 
 'x, -y-1/2, z-1/2' 
 
_cell_length_a                    7.79410(10) 
_cell_length_b                    20.7801(5) 
_cell_length_c                    6.3806(2) 
_cell_angle_alpha                 90.00 
_cell_angle_beta                  106.6700(8) 
_cell_angle_gamma                 90.00 
_cell_volume                      989.98(4) 
_cell_formula_units_Z             4 
_cell_measurement_temperature     293(2) 
_cell_measurement_reflns_used     12186
_cell_measurement_theta_min        3.47
_cell_measurement_theta_max        27.47
 
_exptl_crystal_description        'flake' 
_exptl_crystal_colour             'light purple' 
_exptl_crystal_size_max           0.35 
_exptl_crystal_size_mid           0.11 
_exptl_crystal_size_min           0.03 
_exptl_crystal_density_meas       ? 
_exptl_crystal_density_diffrn     2.660 
_exptl_crystal_density_method     'not measured' 
_exptl_crystal_F_000              756 
_exptl_absorpt_coefficient_mu     5.489 
_exptl_absorpt_correction_type    empirical
_exptl_absorpt_correction_T_min   0.606 
_exptl_absorpt_correction_T_max   0.859 
_exptl_absorpt_process_details    '(Blessing, 1995, 1997)' 
 
_exptl_special_details 
; 
 ? 
; 
 
_diffrn_ambient_temperature       293(2) 
_diffrn_radiation_wavelength      0.71073 
_diffrn_radiation_type            MoK\a 
_diffrn_radiation_source          'fine-focus sealed tube' 
_diffrn_radiation_monochromator   graphite 
_diffrn_measurement_device_type   'NONIUS KappaCCD Diffractometer' 
_diffrn_measurement_method        'CCD' 
_diffrn_detector_area_resol_mean  0.76 
_diffrn_standards_number          ? 
_diffrn_standards_interval_count  ? 
_diffrn_standards_interval_time   ? 
_diffrn_standards_decay_%         none 
_diffrn_reflns_number             15843 
_diffrn_reflns_av_R_equivalents   0.0941 
_diffrn_reflns_av_sigmaI/netI     0.0558 
_diffrn_reflns_limit_h_min        -10 
_diffrn_reflns_limit_h_max        10 
_diffrn_reflns_limit_k_min        -26 
_diffrn_reflns_limit_k_max        26 
_diffrn_reflns_limit_l_min        -8 
_diffrn_reflns_limit_l_max        8 
_diffrn_reflns_theta_min          3.47 
_diffrn_reflns_theta_max          27.47 
_reflns_number_total              2257 
_reflns_number_gt                 1705 
_reflns_threshold_expression      >2sigma(I) 
 
_computing_data_collection        'KappaCCD (Nonius B. V., 1998)' 
_computing_cell_refinement        'HKL Scalepack (Otwinowski & Minor, 1997)' 
_computing_data_reduction
'HKL Denzo (Otwinowski & Minor, 1997) & maXus (Mackay et al., 1998)'
_computing_structure_solution     'SHELXS-97 (Sheldrick, 1997)' 
_computing_structure_refinement   'SHELXL-97 (Sheldrick, 1997)' 
_computing_molecular_graphics     'Bruker SHELXTL V5.1 (Sheldrick, 1998)' 
_computing_publication_material   'SHELXL-97 (Sheldrick, 1997)' 

_publ_section_references
;
collect:
"Collect" data collection software, Nonius B.V., Delft, The Netherlands, 1998.

HKL Scalepack & HKL Denzo:
Z. Otwinowski and W. Minor, " Processing of X-ray Diffraction Data Collected
in Oscillation Mode ", Methods in Enzymology, Volume 276: Macromolecular
Crystallography, part A, p.307-326, 1997,C.W. Carter, Jr. & R.M. Sweet,
Eds., Academic Press, London.

absorption correction:
R.H. Blessing (1995) Acta Cryst. A51, 33-37.
R.H. Blessing (1997) J.Appl. Cryst. 30, 421-426.

maXus: 
S.Mackay, C.J.Gilmore, C.Edwards, M. Tremayne, N. Stuart, K.Shankland
"maXus: a computer program for the solution and refinement of crystal
structures from diffraction data", University of Glasgow, Scotland, UK,
Nonius BV, Delft, The Netherlands and MacScience Co. Ltd., Yokohama,
Japan (1998).

Sheldrick, G. M. (1998). SHELXTL Version 5.1. Bruker Analytical X-ray
Instruments Inc., Madison, Wisconsin, USA.

Sheldrick, G. M. (1997). SHELX-97. PC Version. University of Goettingen,
Germany.
;
 
_refine_special_details 
; 
 Refinement of F^2^ against ALL reflections.  The weighted R-factor wR and 
 goodness of fit S are based on F^2^, conventional R-factors R are based 
 on F, with F set to zero for negative F^2^. The threshold expression of 
 F^2^ > 2sigma(F^2^) is used only for calculating R-factors(gt) etc. and is 
 not relevant to the choice of reflections for refinement.  R-factors based 
 on F^2^ are statistically about twice as large as those based on F, and R- 
 factors based on ALL data will be even larger. 
; 
 
_refine_ls_structure_factor_coef  Fsqd  
_refine_ls_matrix_type            full 
_refine_ls_weighting_scheme       calc  
_refine_ls_weighting_details 
 'calc w=1/[\s^2^(Fo^2^)+(0.0312P)^2^+0.0000P] where P=(Fo^2^+2Fc^2^)/3' 
_atom_sites_solution_primary      direct 
_atom_sites_solution_secondary    difmap 
_atom_sites_solution_hydrogens    geom 
_refine_ls_hydrogen_treatment     mixed 
_refine_ls_extinction_method      none 
_refine_ls_extinction_coef        ? 
_refine_ls_number_reflns          2257 
_refine_ls_number_parameters      162 
_refine_ls_number_restraints      0 
_refine_ls_R_factor_all           0.0468 
_refine_ls_R_factor_gt            0.0294 
_refine_ls_wR_factor_ref          0.0633 
_refine_ls_wR_factor_gt           0.0599 
_refine_ls_goodness_of_fit_ref    0.950 
_refine_ls_restrained_S_all       0.950 
_refine_ls_shift/su_max           0.001 
_refine_ls_shift/su_mean          0.000 
 
loop_ 
 _atom_site_label 
 _atom_site_type_symbol 
 _atom_site_fract_x 
 _atom_site_fract_y 
 _atom_site_fract_z 
 _atom_site_U_iso_or_equiv 
 _atom_site_adp_type 
 _atom_site_occupancy 
 _atom_site_symmetry_multiplicity 
 _atom_site_calc_flag 
 _atom_site_refinement_flags 
 _atom_site_disorder_assembly 
 _atom_site_disorder_group 
Nd1 Nd 0.15543(3) 0.429805(10) 0.71331(3) 0.01409(9) Uani 1 1 d . . . 
C6 C -0.1089(7) 0.3287(2) 0.5692(7) 0.0205(10) Uani 1 1 d . . . 
C1 C -0.2426(6) 0.2748(2) 0.5192(7) 0.0176(10) Uani 1 1 d . . . 
C2 C -0.4234(6) 0.2856(2) 0.4565(6) 0.0201(10) Uani 1 1 d . . . 
H3A H -0.4664 0.3277 0.4433 0.024 Uiso 1 1 calc R . . 
C3 C -0.5424(7) 0.2351(2) 0.4129(7) 0.0214(10) Uani 1 1 d . . . 
H4A H -0.6652 0.2426 0.3698 0.026 Uiso 1 1 calc R . . 
C5 C -0.1816(6) 0.2116(2) 0.5405(6) 0.0200(10) Uani 1 1 d . . . 
H5A H -0.0592 0.2032 0.5855 0.024 Uiso 1 1 calc R . . 
C4 C -0.3015(6) 0.1615(2) 0.4951(7) 0.0206(10) Uani 1 1 d . . . 
H6A H -0.2608 0.1192 0.5069 0.025 Uiso 1 1 calc R . . 
N1 N -0.4781(5) 0.17410(18) 0.4336(5) 0.0180(8) Uani 1 1 d . . . 
O1 O -0.1605(4) 0.38614(15) 0.5460(5) 0.0275(8) Uani 1 1 d . . . 
O2 O 0.0560(5) 0.31455(15) 0.6424(5) 0.0282(8) Uani 1 1 d . . . 
O3 O -0.5900(4) 0.12507(15) 0.3984(5) 0.0289(8) Uani 1 1 d . . . 
O7 O 0.2698(4) 0.48143(14) 0.1201(5) 0.0220(7) Uani 1 1 d . . . 
O6 O 0.0489(4) 0.40129(15) 0.0309(4) 0.0235(7) Uani 1 1 d . . . 
O5 O 0.2675(5) 0.39850(16) 0.3911(5) 0.0283(8) Uani 1 1 d . . . 
O4 O 0.0435(4) 0.47740(14) 0.3176(4) 0.0185(7) Uani 1 1 d . . . 
O8 O 0.3599(6) 0.51728(19) 0.7007(6) 0.0289(9) Uani 1 1 d . . . 
S1 S 0.16025(16) 0.43937(5) 0.21378(17) 0.0158(2) Uani 1 1 d . . . 
H8A H 0.343(7) 0.548(2) 0.650(8) 0.018(16) Uiso 1 1 d . . . 
H8B H 0.483(9) 0.517(3) 0.761(9) 0.07(2) Uiso 1 1 d . . . 
 
loop_ 
 _atom_site_aniso_label 
 _atom_site_aniso_U_11 
 _atom_site_aniso_U_22 
 _atom_site_aniso_U_33 
 _atom_site_aniso_U_23 
 _atom_site_aniso_U_13 
 _atom_site_aniso_U_12 
Nd1 0.01573(14) 0.01249(13) 0.01397(14) 0.00063(10) 0.00412(9) 0.00074(11) 
C6 0.028(3) 0.021(3) 0.013(2) -0.0002(18) 0.0065(19) -0.005(2) 
C1 0.021(3) 0.017(2) 0.015(2) 0.0033(17) 0.0049(18) -0.003(2) 
C2 0.026(3) 0.016(2) 0.018(2) -0.0017(18) 0.0055(19) -0.001(2) 
C3 0.018(3) 0.026(3) 0.020(2) -0.0006(19) 0.006(2) 0.000(2) 
C5 0.018(3) 0.019(2) 0.024(3) -0.0024(19) 0.007(2) -0.004(2) 
C4 0.027(3) 0.013(2) 0.020(2) -0.0011(17) 0.004(2) 0.001(2) 
N1 0.017(2) 0.017(2) 0.0190(19) -0.0027(15) 0.0033(16) -0.0051(16) 
O1 0.029(2) 0.0143(18) 0.0342(19) 0.0032(13) 0.0019(16) -0.0018(14) 
O2 0.024(2) 0.0176(17) 0.041(2) -0.0064(14) 0.0050(16) -0.0045(15) 
O3 0.025(2) 0.0204(18) 0.0350(19) -0.0004(14) -0.0012(15) -0.0094(15) 
O7 0.024(2) 0.0223(18) 0.0204(17) -0.0015(13) 0.0080(14) -0.0029(15) 
O6 0.031(2) 0.0230(17) 0.0176(17) -0.0038(14) 0.0092(14) -0.0047(16) 
O5 0.040(2) 0.0269(18) 0.0193(17) 0.0065(14) 0.0114(15) 0.0161(17) 
O4 0.0161(17) 0.0204(16) 0.0199(17) -0.0024(12) 0.0067(13) 0.0019(14) 
O8 0.024(2) 0.025(2) 0.034(2) 0.0128(17) 0.0021(17) -0.0026(18) 
S1 0.0179(6) 0.0157(6) 0.0144(5) 0.0011(4) 0.0055(4) 0.0025(5) 
 
_geom_special_details 
; 
 All esds (except the esd in the dihedral angle between two l.s. planes) 
 are estimated using the full covariance matrix.  The cell esds are taken 
 into account individually in the estimation of esds in distances, angles 
 and torsion angles; correlations between esds in cell parameters are only 
 used when they are defined by crystal symmetry.  An approximate (isotropic) 
 treatment of cell esds is used for estimating esds involving l.s. planes. 
; 
 
loop_ 
 _geom_bond_atom_site_label_1 
 _geom_bond_atom_site_label_2 
 _geom_bond_distance 
 _geom_bond_site_symmetry_2 
 _geom_bond_publ_flag 
Nd1 O3 2.299(3) 4_666 ? 
Nd1 O8 2.434(4) . ? 
Nd1 O4 2.447(3) 3_566 ? 
Nd1 O6 2.472(3) 1_556 ? 
Nd1 O2 2.518(3) . ? 
Nd1 O5 2.538(3) . ? 
Nd1 O1 2.553(3) . ? 
Nd1 O4 2.617(3) . ? 
Nd1 O7 2.712(3) 1_556 ? 
Nd1 C6 2.902(5) . ? 
Nd1 S1 3.1889(11) 1_556 ? 
Nd1 S1 3.2044(11) . ? 
C6 O1 1.255(5) . ? 
C6 O2 1.269(6) . ? 
C6 C1 1.499(6) . ? 
C1 C2 1.369(6) . ? 
C1 C5 1.390(6) . ? 
C2 C3 1.376(6) . ? 
C3 N1 1.355(5) . ? 
C5 C4 1.373(6) . ? 
C4 N1 1.344(6) . ? 
N1 O3 1.318(5) . ? 
O3 Nd1 2.299(3) 4_465 ? 
O7 S1 1.464(3) . ? 
O7 Nd1 2.712(3) 1_554 ? 
O6 S1 1.470(3) . ? 
O6 Nd1 2.472(3) 1_554 ? 
O5 S1 1.469(3) . ? 
O4 S1 1.496(3) . ? 
O4 Nd1 2.447(3) 3_566 ? 
S1 Nd1 3.1889(11) 1_554 ? 
 
loop_ 
 _geom_angle_atom_site_label_1 
 _geom_angle_atom_site_label_2 
 _geom_angle_atom_site_label_3 
 _geom_angle 
 _geom_angle_site_symmetry_1 
 _geom_angle_site_symmetry_3 
 _geom_angle_publ_flag 
O3 Nd1 O8 84.86(14) 4_666 . ? 
O3 Nd1 O4 149.98(10) 4_666 3_566 ? 
O8 Nd1 O4 79.32(13) . 3_566 ? 
O3 Nd1 O6 84.46(12) 4_666 1_556 ? 
O8 Nd1 O6 125.67(12) . 1_556 ? 
O4 Nd1 O6 84.31(10) 3_566 1_556 ? 
O3 Nd1 O2 78.26(11) 4_666 . ? 
O8 Nd1 O2 151.06(13) . . ? 
O4 Nd1 O2 125.43(11) 3_566 . ? 
O6 Nd1 O2 76.16(10) 1_556 . ? 
O3 Nd1 O5 80.92(11) 4_666 . ? 
O8 Nd1 O5 77.52(12) . . ? 
O4 Nd1 O5 119.60(9) 3_566 . ? 
O6 Nd1 O5 151.28(11) 1_556 . ? 
O2 Nd1 O5 76.73(11) . . ? 
O3 Nd1 O1 128.69(11) 4_666 . ? 
O8 Nd1 O1 144.47(12) . . ? 
O4 Nd1 O1 74.53(10) 3_566 . ? 
O6 Nd1 O1 75.34(10) 1_556 . ? 
O2 Nd1 O1 51.43(10) . . ? 
O5 Nd1 O1 94.88(11) . . ? 
O3 Nd1 O4 133.03(11) 4_666 . ? 
O8 Nd1 O4 74.10(11) . . ? 
O4 Nd1 O4 66.19(10) 3_566 . ? 
O6 Nd1 O4 141.62(10) 1_556 . ? 
O2 Nd1 O4 100.72(10) . . ? 
O5 Nd1 O4 54.01(9) . . ? 
O1 Nd1 O4 73.53(10) . . ? 
O3 Nd1 O7 72.93(10) 4_666 1_556 ? 
O8 Nd1 O7 72.40(11) . 1_556 ? 
O4 Nd1 O7 78.00(9) 3_566 1_556 ? 
O6 Nd1 O7 53.54(9) 1_556 1_556 ? 
O2 Nd1 O7 123.22(10) . 1_556 ? 
O5 Nd1 O7 141.41(11) . 1_556 ? 
O1 Nd1 O7 123.60(10) . 1_556 ? 
O4 Nd1 O7 134.49(9) . 1_556 ? 
O3 Nd1 C6 103.49(13) 4_666 . ? 
O8 Nd1 C6 160.48(12) . . ? 
O4 Nd1 C6 99.74(12) 3_566 . ? 
O6 Nd1 C6 73.22(11) 1_556 . ? 
O2 Nd1 C6 25.87(12) . . ? 
O5 Nd1 C6 86.31(12) . . ? 
O1 Nd1 C6 25.59(11) . . ? 
O4 Nd1 C6 87.60(10) . . ? 
O7 Nd1 C6 126.75(10) 1_556 . ? 
O3 Nd1 S1 75.88(9) 4_666 1_556 ? 
O8 Nd1 S1 99.60(9) . 1_556 ? 
O4 Nd1 S1 81.77(7) 3_566 1_556 ? 
O6 Nd1 S1 26.42(7) 1_556 1_556 ? 
O2 Nd1 S1 98.84(8) . 1_556 ? 
O5 Nd1 S1 156.80(7) . 1_556 ? 
O1 Nd1 S1 100.00(7) . 1_556 ? 
O4 Nd1 S1 147.93(7) . 1_556 ? 
O7 Nd1 S1 27.22(7) 1_556 1_556 ? 
C6 Nd1 S1 99.54(8) . 1_556 ? 
O3 Nd1 S1 106.67(9) 4_666 . ? 
O8 Nd1 S1 74.11(9) . . ? 
O4 Nd1 S1 93.38(7) 3_566 . ? 
O6 Nd1 S1 158.85(7) 1_556 . ? 
O2 Nd1 S1 88.35(8) . . ? 
O5 Nd1 S1 26.53(7) . . ? 
O1 Nd1 S1 83.76(7) . . ? 
O4 Nd1 S1 27.48(6) . . ? 
O7 Nd1 S1 146.41(7) 1_556 . ? 
C6 Nd1 S1 86.53(8) . . ? 
S1 Nd1 S1 172.76(4) 1_556 . ? 
O1 C6 O2 121.3(4) . . ? 
O1 C6 C1 120.4(4) . . ? 
O2 C6 C1 118.3(4) . . ? 
O1 C6 Nd1 61.5(2) . . ? 
O2 C6 Nd1 59.9(2) . . ? 
C1 C6 Nd1 174.1(3) . . ? 
C2 C1 C5 118.6(4) . . ? 
C2 C1 C6 122.3(4) . . ? 
C5 C1 C6 119.2(4) . . ? 
C1 C2 C3 120.7(4) . . ? 
N1 C3 C2 119.0(4) . . ? 
C4 C5 C1 120.2(4) . . ? 
N1 C4 C5 119.5(4) . . ? 
O3 N1 C4 118.2(4) . . ? 
O3 N1 C3 119.9(4) . . ? 
C4 N1 C3 121.9(4) . . ? 
C6 O1 Nd1 92.9(3) . . ? 
C6 O2 Nd1 94.2(3) . . ? 
N1 O3 Nd1 154.5(3) . 4_465 ? 
S1 O7 Nd1 94.86(14) . 1_554 ? 
S1 O6 Nd1 105.12(16) . 1_554 ? 
S1 O5 Nd1 102.93(16) . . ? 
S1 O4 Nd1 146.37(17) . 3_566 ? 
S1 O4 Nd1 98.68(14) . . ? 
Nd1 O4 Nd1 113.81(10) 3_566 . ? 
O7 S1 O5 113.0(2) . . ? 
O7 S1 O6 106.14(17) . . ? 
O5 S1 O6 112.10(19) . . ? 
O7 S1 O4 111.44(18) . . ? 
O5 S1 O4 104.38(17) . . ? 
O6 S1 O4 109.91(18) . . ? 
O7 S1 Nd1 57.92(12) . 1_554 ? 
O5 S1 Nd1 125.16(13) . 1_554 ? 
O6 S1 Nd1 48.46(12) . 1_554 ? 
O4 S1 Nd1 129.99(12) . 1_554 ? 
O7 S1 Nd1 128.16(12) . . ? 
O5 S1 Nd1 50.54(12) . . ? 
O6 S1 Nd1 125.70(13) . . ? 
O4 S1 Nd1 53.84(11) . . ? 
Nd1 S1 Nd1 172.76(4) 1_554 . ? 
 
loop_ 
 _geom_hbond_atom_site_label_D 
 _geom_hbond_atom_site_label_H 
 _geom_hbond_atom_site_label_A 
 _geom_hbond_distance_DH 
 _geom_hbond_distance_HA 
 _geom_hbond_distance_DA 
 _geom_hbond_angle_DHA 
 _geom_hbond_site_symmetry_A 
O8 H8B O7  0.93(7) 1.86(7) 2.783(5) 178(6) 3_666 
 
_diffrn_measured_fraction_theta_max    0.998 
_diffrn_reflns_theta_full              27.47 
_diffrn_measured_fraction_theta_full   0.998 
_refine_diff_density_max    0.811 
_refine_diff_density_min   -1.612 
_refine_diff_density_rms    0.194 

#===END


## Crystallographic Data of Complex 5

data_5 
 
_audit_creation_method            SHELXL-97 
_chemical_name_systematic 
; 
 ? 
; 
_chemical_name_common             ? 
_chemical_melting_point           ? 
_chemical_formula_moiety          ? 
_chemical_formula_sum 
 'C6 H6 N O8 S Sm' 
_chemical_formula_weight          402.53 
 
loop_ 
 _atom_type_symbol 
 _atom_type_description 
 _atom_type_scat_dispersion_real 
 _atom_type_scat_dispersion_imag 
 _atom_type_scat_source 
 'C'  'C'   0.0033   0.0016 
 'International Tables Vol C Tables 4.2.6.8 and 6.1.1.4' 
 'H'  'H'   0.0000   0.0000 
 'International Tables Vol C Tables 4.2.6.8 and 6.1.1.4' 
 'N'  'N'   0.0061   0.0033 
 'International Tables Vol C Tables 4.2.6.8 and 6.1.1.4' 
 'O'  'O'   0.0106   0.0060 
 'International Tables Vol C Tables 4.2.6.8 and 6.1.1.4' 
 'Sm'  'Sm'  -0.1638   3.4418 
 'International Tables Vol C Tables 4.2.6.8 and 6.1.1.4' 
 'S'  'S'   0.1246   0.1234 
 'International Tables Vol C Tables 4.2.6.8 and 6.1.1.4' 
 
_symmetry_cell_setting            'monoclinic' 
_symmetry_space_group_name_H-M    'P21/c' 
 
loop_ 
 _symmetry_equiv_pos_as_xyz 
 'x, y, z' 
 '-x, y+1/2, -z+1/2' 
 '-x, -y, -z' 
 'x, -y-1/2, z-1/2' 
 
_cell_length_a                    7.7706(2) 
_cell_length_b                    20.6308(7) 
_cell_length_c                    6.3439(2) 
_cell_angle_alpha                 90.00 
_cell_angle_beta                  106.7118(14) 
_cell_angle_gamma                 90.00 
_cell_volume                      974.06(5) 
_cell_formula_units_Z             4 
_cell_measurement_temperature     293(2) 
_cell_measurement_reflns_used     14480
_cell_measurement_theta_min        3.50
_cell_measurement_theta_max        27.50
 
_exptl_crystal_description        'plate' 
_exptl_crystal_colour             'colorless' 
_exptl_crystal_size_max           0.60 
_exptl_crystal_size_mid           0.15 
_exptl_crystal_size_min           0.02 
_exptl_crystal_density_meas       ? 
_exptl_crystal_density_diffrn     2.745 
_exptl_crystal_density_method     'not measured' 
_exptl_crystal_F_000              764 
_exptl_absorpt_coefficient_mu     6.277 
_exptl_absorpt_correction_type    empirical 
_exptl_absorpt_correction_T_min   0.424 
_exptl_absorpt_correction_T_max   0.898 
_exptl_absorpt_process_details    '(Blessing, 1995, 1997)' 
 
_exptl_special_details 
; 
 ? 
; 
 
_diffrn_ambient_temperature       293(2) 
_diffrn_radiation_wavelength      0.71073 
_diffrn_radiation_type            MoK\a 
_diffrn_radiation_source          'fine-focus sealed tube' 
_diffrn_radiation_monochromator   graphite 
_diffrn_measurement_device_type   'NONIUS KappaCCD Diffractometer' 
_diffrn_measurement_method        'CCD' 
_diffrn_detector_area_resol_mean  0.76 
_diffrn_standards_number          ? 
_diffrn_standards_interval_count  ? 
_diffrn_standards_interval_time   ? 
_diffrn_standards_decay_%         none 
_diffrn_reflns_number             15756 
_diffrn_reflns_av_R_equivalents   0.1345 
_diffrn_reflns_av_sigmaI/netI     0.0909 
_diffrn_reflns_limit_h_min        -10 
_diffrn_reflns_limit_h_max        10 
_diffrn_reflns_limit_k_min        -26 
_diffrn_reflns_limit_k_max        26 
_diffrn_reflns_limit_l_min        -8 
_diffrn_reflns_limit_l_max        8 
_diffrn_reflns_theta_min          3.50 
_diffrn_reflns_theta_max          27.50 
_reflns_number_total              2235 
_reflns_number_gt                 1503 
_reflns_threshold_expression      >2sigma(I) 
 
_computing_data_collection        'KappaCCD (Nonius B. V., 1998)' 
_computing_cell_refinement        'HKL Scalepack (Otwinowski & Minor, 1997)' 
_computing_data_reduction
'HKL Denzo (Otwinowski & Minor, 1997) & maXus (Mackay et al., 1998)'
_computing_structure_solution     'SHELXS-97 (Sheldrick, 1997)' 
_computing_structure_refinement   'SHELXL-97 (Sheldrick, 1997)' 
_computing_molecular_graphics     'Bruker SHELXTL V5.1 (Sheldrick, 1998)' 
_computing_publication_material   'SHELXL-97 (Sheldrick, 1997)' 

_publ_section_references
;
collect:
"Collect" data collection software, Nonius B.V., Delft, The Netherlands, 1998.

HKL Scalepack & HKL Denzo:
Z. Otwinowski and W. Minor, " Processing of X-ray Diffraction Data Collected
in Oscillation Mode ", Methods in Enzymology, Volume 276: Macromolecular
Crystallography, part A, p.307-326, 1997,C.W. Carter, Jr. & R.M. Sweet,
Eds., Academic Press, London.

absorption correction:
R.H. Blessing (1995) Acta Cryst. A51, 33-37.
R.H. Blessing (1997) J.Appl. Cryst. 30, 421-426.

maXus: 
S.Mackay, C.J.Gilmore, C.Edwards, M. Tremayne, N. Stuart, K.Shankland
"maXus: a computer program for the solution and refinement of crystal
structures from diffraction data", University of Glasgow, Scotland, UK,
Nonius BV, Delft, The Netherlands and MacScience Co. Ltd., Yokohama,
Japan (1998).

Sheldrick, G. M. (1998). SHELXTL Version 5.1. Bruker Analytical X-ray
Instruments Inc., Madison, Wisconsin, USA.

Sheldrick, G. M. (1997). SHELX-97. PC Version. University of Goettingen,
Germany.
;
 
_refine_special_details 
; 
 Refinement of F^2^ against ALL reflections.  The weighted R-factor wR and 
 goodness of fit S are based on F^2^, conventional R-factors R are based 
 on F, with F set to zero for negative F^2^. The threshold expression of 
 F^2^ > 2sigma(F^2^) is used only for calculating R-factors(gt) etc. and is 
 not relevant to the choice of reflections for refinement.  R-factors based 
 on F^2^ are statistically about twice as large as those based on F, and R- 
 factors based on ALL data will be even larger. 
; 
 
_refine_ls_structure_factor_coef  Fsqd  
_refine_ls_matrix_type            full 
_refine_ls_weighting_scheme       calc  
_refine_ls_weighting_details 
 'calc w=1/[\s^2^(Fo^2^)+(0.0413P)^2^+0.0000P] where P=(Fo^2^+2Fc^2^)/3' 
_atom_sites_solution_primary      direct 
_atom_sites_solution_secondary    difmap 
_atom_sites_solution_hydrogens    geom 
_refine_ls_hydrogen_treatment     mixed 
_refine_ls_extinction_method      none 
_refine_ls_extinction_coef        ? 
_refine_ls_number_reflns          2235 
_refine_ls_number_parameters      162 
_refine_ls_number_restraints      0 
_refine_ls_R_factor_all           0.0726 
_refine_ls_R_factor_gt            0.0405 
_refine_ls_wR_factor_ref          0.0869 
_refine_ls_wR_factor_gt           0.0808 
_refine_ls_goodness_of_fit_ref    0.928 
_refine_ls_restrained_S_all       0.928 
_refine_ls_shift/su_max           0.001 
_refine_ls_shift/su_mean          0.000 
 
loop_ 
 _atom_site_label 
 _atom_site_type_symbol 
 _atom_site_fract_x 
 _atom_site_fract_y 
 _atom_site_fract_z 
 _atom_site_U_iso_or_equiv 
 _atom_site_adp_type 
 _atom_site_occupancy 
 _atom_site_symmetry_multiplicity 
 _atom_site_calc_flag 
 _atom_site_refinement_flags 
 _atom_site_disorder_assembly 
 _atom_site_disorder_group 
Sm1 Sm 0.15368(5) 0.429600(16) 0.71054(5) 0.01569(13) Uani 1 1 d . . . 
C6 C -0.1089(11) 0.3285(4) 0.5680(11) 0.0220(17) Uani 1 1 d . . . 
C1 C -0.2428(10) 0.2749(3) 0.5168(11) 0.0207(16) Uani 1 1 d . . . 
C2 C -0.4251(10) 0.2858(4) 0.4543(11) 0.0260(18) Uani 1 1 d . . . 
H3A H -0.4679 0.3281 0.4401 0.031 Uiso 1 1 calc R . . 
C3 C -0.5461(11) 0.2347(3) 0.4121(12) 0.0265(18) Uani 1 1 d . . . 
H4A H -0.6693 0.2423 0.3701 0.032 Uiso 1 1 calc R . . 
C5 C -0.1824(10) 0.2098(4) 0.5385(11) 0.0235(17) Uani 1 1 d . . . 
H5A H -0.0600 0.2007 0.5839 0.028 Uiso 1 1 calc R . . 
C4 C -0.3041(11) 0.1605(3) 0.4926(11) 0.0259(18) Uani 1 1 d . . . 
H6A H -0.2640 0.1178 0.5025 0.031 Uiso 1 1 calc R . . 
N1 N -0.4801(8) 0.1727(3) 0.4336(9) 0.0209(14) Uani 1 1 d . . . 
O1 O -0.1593(7) 0.3869(2) 0.5462(8) 0.0295(13) Uani 1 1 d . . . 
O2 O 0.0553(8) 0.3146(2) 0.6393(9) 0.0319(13) Uani 1 1 d . . . 
O3 O -0.5921(7) 0.1233(2) 0.3988(8) 0.0310(13) Uani 1 1 d . . . 
O7 O 0.2715(7) 0.4832(2) 0.1240(8) 0.0260(12) Uani 1 1 d . . . 
O6 O 0.0487(7) 0.4024(2) 0.0271(7) 0.0245(12) Uani 1 1 d . . . 
O5 O 0.2642(7) 0.3978(2) 0.3900(8) 0.0258(12) Uani 1 1 d . . . 
O4 O 0.0406(6) 0.4780(2) 0.3164(7) 0.0184(11) Uani 1 1 d . . . 
O8 O 0.3588(9) 0.5159(3) 0.7000(11) 0.0291(15) Uani 1 1 d . . . 
S1 S 0.1594(2) 0.44003(7) 0.2123(3) 0.0168(4) Uani 1 1 d . . . 
H8A H 0.361(16) 0.544(5) 0.670(19) 0.06(5) Uiso 1 1 d . . . 
H8B H 0.501(13) 0.513(4) 0.770(14) 0.07(3) Uiso 1 1 d . . . 
 
loop_ 
 _atom_site_aniso_label 
 _atom_site_aniso_U_11 
 _atom_site_aniso_U_22 
 _atom_site_aniso_U_33 
 _atom_site_aniso_U_23 
 _atom_site_aniso_U_13 
 _atom_site_aniso_U_12 
Sm1 0.0200(2) 0.01215(19) 0.01643(19) 0.00089(17) 0.00768(14) 0.00133(18) 
C6 0.032(5) 0.020(4) 0.017(4) -0.004(3) 0.012(3) -0.008(3) 
C1 0.020(4) 0.027(4) 0.017(4) 0.000(3) 0.008(3) -0.003(3) 
C2 0.034(5) 0.014(4) 0.029(4) 0.000(3) 0.006(4) -0.003(3) 
C3 0.030(5) 0.029(5) 0.023(4) -0.003(3) 0.012(4) 0.001(4) 
C5 0.026(5) 0.022(4) 0.024(4) -0.003(3) 0.010(3) -0.002(3) 
C4 0.037(5) 0.015(4) 0.028(4) -0.001(3) 0.013(4) 0.003(4) 
N1 0.023(4) 0.022(3) 0.018(3) -0.001(2) 0.006(3) -0.002(3) 
O1 0.037(4) 0.012(3) 0.036(3) 0.003(2) 0.005(3) 0.000(2) 
O2 0.030(4) 0.020(3) 0.047(3) -0.007(2) 0.014(3) -0.005(2) 
O3 0.033(3) 0.023(3) 0.033(3) -0.002(2) 0.003(3) -0.011(2) 
O7 0.030(3) 0.022(3) 0.031(3) 0.004(2) 0.016(3) -0.002(2) 
O6 0.032(3) 0.026(3) 0.019(3) -0.002(2) 0.012(2) -0.007(2) 
O5 0.036(3) 0.024(3) 0.018(3) 0.005(2) 0.009(2) 0.013(2) 
O4 0.016(3) 0.021(3) 0.018(3) 0.000(2) 0.004(2) 0.003(2) 
O8 0.028(4) 0.023(4) 0.034(3) 0.010(3) 0.006(3) -0.001(3) 
S1 0.0205(9) 0.0162(9) 0.0160(8) -0.0002(7) 0.0086(7) 0.0021(8) 
 
_geom_special_details 
; 
 All esds (except the esd in the dihedral angle between two l.s. planes) 
 are estimated using the full covariance matrix.  The cell esds are taken 
 into account individually in the estimation of esds in distances, angles 
 and torsion angles; correlations between esds in cell parameters are only 
 used when they are defined by crystal symmetry.  An approximate (isotropic) 
 treatment of cell esds is used for estimating esds involving l.s. planes. 
; 
 
loop_ 
 _geom_bond_atom_site_label_1 
 _geom_bond_atom_site_label_2 
 _geom_bond_distance 
 _geom_bond_site_symmetry_2 
 _geom_bond_publ_flag 
Sm1 O3 2.272(5) 4_666 ? 
Sm1 O8 2.403(6) . ? 
Sm1 O4 2.407(4) 3_566 ? 
Sm1 O6 2.440(4) 1_556 ? 
Sm1 O2 2.494(5) . ? 
Sm1 O5 2.511(4) . ? 
Sm1 O1 2.514(5) . ? 
Sm1 O4 2.599(4) . ? 
Sm1 O7 2.749(5) 1_556 ? 
Sm1 C6 2.876(7) . ? 
Sm1 S1 3.1779(17) 1_556 ? 
Sm1 S1 3.1811(17) . ? 
C6 O2 1.258(9) . ? 
C6 O1 1.263(8) . ? 
C6 C1 1.488(10) . ? 
C1 C2 1.375(10) . ? 
C1 C5 1.417(10) . ? 
C2 C3 1.387(10) . ? 
C3 N1 1.370(9) . ? 
C5 C4 1.362(10) . ? 
C4 N1 1.334(9) . ? 
N1 O3 1.317(7) . ? 
O3 Sm1 2.272(5) 4_465 ? 
O7 S1 1.464(5) . ? 
O7 Sm1 2.749(5) 1_554 ? 
O6 S1 1.464(5) . ? 
O6 Sm1 2.440(4) 1_554 ? 
O5 S1 1.471(5) . ? 
O4 S1 1.501(4) . ? 
O4 Sm1 2.407(4) 3_566 ? 
S1 Sm1 3.1779(17) 1_554 ? 
 
loop_ 
 _geom_angle_atom_site_label_1 
 _geom_angle_atom_site_label_2 
 _geom_angle_atom_site_label_3 
 _geom_angle 
 _geom_angle_site_symmetry_1 
 _geom_angle_site_symmetry_3 
 _geom_angle_publ_flag 
O3 Sm1 O8 83.5(2) 4_666 . ? 
O3 Sm1 O4 148.26(17) 4_666 3_566 ? 
O8 Sm1 O4 79.5(2) . 3_566 ? 
O3 Sm1 O6 84.42(18) 4_666 1_556 ? 
O8 Sm1 O6 125.08(19) . 1_556 ? 
O4 Sm1 O6 83.66(15) 3_566 1_556 ? 
O3 Sm1 O2 79.22(19) 4_666 . ? 
O8 Sm1 O2 150.6(2) . . ? 
O4 Sm1 O2 125.98(17) 3_566 . ? 
O6 Sm1 O2 76.86(16) 1_556 . ? 
O3 Sm1 O5 81.50(17) 4_666 . ? 
O8 Sm1 O5 77.7(2) . . ? 
O4 Sm1 O5 120.18(15) 3_566 . ? 
O6 Sm1 O5 151.55(16) 1_556 . ? 
O2 Sm1 O5 76.30(17) . . ? 
O3 Sm1 O1 129.86(17) 4_666 . ? 
O8 Sm1 O1 144.9(2) . . ? 
O4 Sm1 O1 74.69(15) 3_566 . ? 
O6 Sm1 O1 75.42(16) 1_556 . ? 
O2 Sm1 O1 51.83(17) . . ? 
O5 Sm1 O1 95.04(17) . . ? 
O3 Sm1 O4 133.82(17) 4_666 . ? 
O8 Sm1 O4 74.47(19) . . ? 
O4 Sm1 O4 66.17(16) 3_566 . ? 
O6 Sm1 O4 141.20(15) 1_556 . ? 
O2 Sm1 O4 100.93(16) . . ? 
O5 Sm1 O4 54.62(14) . . ? 
O1 Sm1 O4 73.51(15) . . ? 
O3 Sm1 O7 72.00(16) 4_666 1_556 ? 
O8 Sm1 O7 71.78(18) . 1_556 ? 
O4 Sm1 O7 77.26(15) 3_566 1_556 ? 
O6 Sm1 O7 53.55(15) 1_556 1_556 ? 
O2 Sm1 O7 123.77(16) . 1_556 ? 
O5 Sm1 O7 141.25(16) . 1_556 ? 
O1 Sm1 O7 123.62(15) . 1_556 ? 
O4 Sm1 O7 133.73(14) . 1_556 ? 
O3 Sm1 C6 104.3(2) 4_666 . ? 
O8 Sm1 C6 160.9(2) . . ? 
O4 Sm1 C6 100.3(2) 3_566 . ? 
O6 Sm1 C6 73.55(17) 1_556 . ? 
O2 Sm1 C6 25.86(19) . . ? 
O5 Sm1 C6 86.16(18) . . ? 
O1 Sm1 C6 26.00(19) . . ? 
O4 Sm1 C6 87.88(17) . . ? 
O7 Sm1 C6 127.08(16) 1_556 . ? 
O3 Sm1 S1 75.32(14) 4_666 1_556 ? 
O8 Sm1 S1 99.17(16) . 1_556 ? 
O4 Sm1 S1 81.10(10) 3_566 1_556 ? 
O6 Sm1 S1 26.25(12) 1_556 1_556 ? 
O2 Sm1 S1 99.28(13) . 1_556 ? 
O5 Sm1 S1 156.81(12) . 1_556 ? 
O1 Sm1 S1 99.93(12) . 1_556 ? 
O4 Sm1 S1 147.24(10) . 1_556 ? 
O7 Sm1 S1 27.40(10) 1_556 1_556 ? 
C6 Sm1 S1 99.69(13) . 1_556 ? 
O3 Sm1 S1 107.23(13) 4_666 . ? 
O8 Sm1 S1 73.94(16) . . ? 
O4 Sm1 S1 93.64(11) 3_566 . ? 
O6 Sm1 S1 159.49(12) 1_556 . ? 
O2 Sm1 S1 88.59(13) . . ? 
O5 Sm1 S1 26.79(11) . . ? 
O1 Sm1 S1 84.25(12) . . ? 
O4 Sm1 S1 27.84(10) . . ? 
O7 Sm1 S1 145.57(10) 1_556 . ? 
C6 Sm1 S1 87.03(13) . . ? 
S1 Sm1 S1 172.09(6) 1_556 . ? 
O2 C6 O1 120.5(7) . . ? 
O2 C6 C1 118.9(7) . . ? 
O1 C6 C1 120.6(7) . . ? 
O2 C6 Sm1 59.9(4) . . ? 
O1 C6 Sm1 60.8(4) . . ? 
C1 C6 Sm1 174.6(5) . . ? 
C2 C1 C5 117.9(6) . . ? 
C2 C1 C6 122.7(7) . . ? 
C5 C1 C6 119.4(7) . . ? 
C1 C2 C3 121.1(7) . . ? 
N1 C3 C2 118.5(7) . . ? 
C4 C5 C1 119.8(7) . . ? 
N1 C4 C5 120.8(7) . . ? 
O3 N1 C4 118.5(6) . . ? 
O3 N1 C3 119.6(6) . . ? 
C4 N1 C3 121.9(6) . . ? 
C6 O1 Sm1 93.2(5) . . ? 
C6 O2 Sm1 94.3(4) . . ? 
N1 O3 Sm1 153.2(4) . 4_465 ? 
S1 O7 Sm1 92.8(2) . 1_554 ? 
S1 O6 Sm1 106.3(2) . 1_554 ? 
S1 O5 Sm1 102.9(2) . . ? 
S1 O4 Sm1 146.6(3) . 3_566 ? 
S1 O4 Sm1 98.2(2) . . ? 
Sm1 O4 Sm1 113.83(16) 3_566 . ? 
O6 S1 O7 107.0(3) . . ? 
O6 S1 O5 111.6(3) . . ? 
O7 S1 O5 113.2(3) . . ? 
O6 S1 O4 109.6(3) . . ? 
O7 S1 O4 111.1(3) . . ? 
O5 S1 O4 104.3(3) . . ? 
O6 S1 Sm1 47.49(18) . 1_554 ? 
O7 S1 Sm1 59.8(2) . 1_554 ? 
O5 S1 Sm1 124.9(2) . 1_554 ? 
O4 S1 Sm1 130.02(19) . 1_554 ? 
O6 S1 Sm1 126.07(19) . . ? 
O7 S1 Sm1 126.9(2) . . ? 
O5 S1 Sm1 50.32(18) . . ? 
O4 S1 Sm1 53.97(18) . . ? 
Sm1 S1 Sm1 172.09(6) 1_554 . ? 
 
loop_ 
 _geom_hbond_atom_site_label_D 
 _geom_hbond_atom_site_label_H 
 _geom_hbond_atom_site_label_A 
 _geom_hbond_distance_DH 
 _geom_hbond_distance_HA 
 _geom_hbond_distance_DA 
 _geom_hbond_angle_DHA 
 _geom_hbond_site_symmetry_A 
O8 H8B O7  1.06(10) 1.71(10) 2.767(8) 175(7) 3_666 
 
_diffrn_measured_fraction_theta_max    0.998 
_diffrn_reflns_theta_full              27.50 
_diffrn_measured_fraction_theta_full   0.998 
_refine_diff_density_max    1.106 
_refine_diff_density_min   -2.571 
_refine_diff_density_rms    0.273 

#===END


## Crystallographic Data of Complex 6

data_6
 
_audit_creation_method            SHELXL-97 
_chemical_name_systematic 
; 
 ? 
; 
_chemical_name_common             ? 
_chemical_melting_point           ? 
_chemical_formula_moiety          ? 
_chemical_formula_sum 
 'C6 H6 Eu N O8 S' 
_chemical_formula_weight          404.14 
 
loop_ 
 _atom_type_symbol 
 _atom_type_description 
 _atom_type_scat_dispersion_real 
 _atom_type_scat_dispersion_imag 
 _atom_type_scat_source 
 'C'  'C'   0.0033   0.0016 
 'International Tables Vol C Tables 4.2.6.8 and 6.1.1.4' 
 'H'  'H'   0.0000   0.0000 
 'International Tables Vol C Tables 4.2.6.8 and 6.1.1.4' 
 'N'  'N'   0.0061   0.0033 
 'International Tables Vol C Tables 4.2.6.8 and 6.1.1.4' 
 'O'  'O'   0.0106   0.0060 
 'International Tables Vol C Tables 4.2.6.8 and 6.1.1.4' 
 'Eu'  'Eu'  -0.1578   3.6682 
 'International Tables Vol C Tables 4.2.6.8 and 6.1.1.4' 
 'S'  'S'   0.1246   0.1234 
 'International Tables Vol C Tables 4.2.6.8 and 6.1.1.4' 
 
_symmetry_cell_setting            'monoclinic' 
_symmetry_space_group_name_H-M    'P21/c' 
 
loop_ 
 _symmetry_equiv_pos_as_xyz 
 'x, y, z' 
 '-x, y+1/2, -z+1/2' 
 '-x, -y, -z' 
 'x, -y-1/2, z-1/2' 
 
_cell_length_a                    7.7564(2) 
_cell_length_b                    20.5503(5) 
_cell_length_c                    6.3399(3) 
_cell_angle_alpha                 90.00 
_cell_angle_beta                  106.8235(10) 
_cell_angle_gamma                 90.00 
_cell_volume                      967.31(6) 
_cell_formula_units_Z             4 
_cell_measurement_temperature     293(2) 
_cell_measurement_reflns_used     10979
_cell_measurement_theta_min        3.50
_cell_measurement_theta_max        27.50
 
_exptl_crystal_description        'flake' 
_exptl_crystal_colour             'colorless' 
_exptl_crystal_size_max           0.35 
_exptl_crystal_size_mid           0.09 
_exptl_crystal_size_min           0.02 
_exptl_crystal_density_meas       ? 
_exptl_crystal_density_diffrn     2.775 
_exptl_crystal_density_method     'not measured' 
_exptl_crystal_F_000              768 
_exptl_absorpt_coefficient_mu     6.734 
_exptl_absorpt_correction_type    empirical 
_exptl_absorpt_correction_T_min   0.533 
_exptl_absorpt_correction_T_max   0.888 
_exptl_absorpt_process_details    '(Blessing, 1995, 1997)' 
 
_exptl_special_details 
; 
 ? 
; 
 
_diffrn_ambient_temperature       293(2) 
_diffrn_radiation_wavelength      0.71073 
_diffrn_radiation_type            MoK\a 
_diffrn_radiation_source          'fine-focus sealed tube' 
_diffrn_radiation_monochromator   graphite 
_diffrn_measurement_device_type   'NONIUS KappaCCD Diffractometer' 
_diffrn_measurement_method        'CCD' 
_diffrn_detector_area_resol_mean  0.76 
_diffrn_standards_number          ? 
_diffrn_standards_interval_count  ? 
_diffrn_standards_interval_time   ? 
_diffrn_standards_decay_%         none 
_diffrn_reflns_number             13501 
_diffrn_reflns_av_R_equivalents   0.1096 
_diffrn_reflns_av_sigmaI/netI     0.0812 
_diffrn_reflns_limit_h_min        -10 
_diffrn_reflns_limit_h_max        10 
_diffrn_reflns_limit_k_min        -26 
_diffrn_reflns_limit_k_max        26 
_diffrn_reflns_limit_l_min        -8 
_diffrn_reflns_limit_l_max        8 
_diffrn_reflns_theta_min          3.50 
_diffrn_reflns_theta_max          27.50 
_reflns_number_total              2217 
_reflns_number_gt                 1536 
_reflns_threshold_expression      >2sigma(I) 
 
_computing_data_collection        'KappaCCD (Nonius B. V., 1998)' 
_computing_cell_refinement        'HKL Scalepack (Otwinowski & Minor, 1997)' 
_computing_data_reduction
'HKL Denzo (Otwinowski & Minor, 1997) & maXus (Mackay et al., 1998)'
_computing_structure_solution     'SHELXS-97 (Sheldrick, 1997)' 
_computing_structure_refinement   'SHELXL-97 (Sheldrick, 1997)' 
_computing_molecular_graphics     'Bruker SHELXTL V5.1 (Sheldrick, 1998)' 
_computing_publication_material   'SHELXL-97 (Sheldrick, 1997)' 

_publ_section_references
;
collect:
"Collect" data collection software, Nonius B.V., Delft, The Netherlands, 1998.

HKL Scalepack & HKL Denzo:
Z. Otwinowski and W. Minor, " Processing of X-ray Diffraction Data Collected
in Oscillation Mode ", Methods in Enzymology, Volume 276: Macromolecular
Crystallography, part A, p.307-326, 1997,C.W. Carter, Jr. & R.M. Sweet,
Eds., Academic Press, London.

absorption correction:
R.H. Blessing (1995) Acta Cryst. A51, 33-37.
R.H. Blessing (1997) J.Appl. Cryst. 30, 421-426.

maXus: 
S.Mackay, C.J.Gilmore, C.Edwards, M. Tremayne, N. Stuart, K.Shankland
"maXus: a computer program for the solution and refinement of crystal
structures from diffraction data", University of Glasgow, Scotland, UK,
Nonius BV, Delft, The Netherlands and MacScience Co. Ltd., Yokohama,
Japan (1998).

Sheldrick, G. M. (1998). SHELXTL Version 5.1. Bruker Analytical X-ray
Instruments Inc., Madison, Wisconsin, USA.

Sheldrick, G. M. (1997). SHELX-97. PC Version. University of Goettingen,
Germany.
;
 
_refine_special_details 
; 
 Refinement of F^2^ against ALL reflections.  The weighted R-factor wR and 
 goodness of fit S are based on F^2^, conventional R-factors R are based 
 on F, with F set to zero for negative F^2^. The threshold expression of 
 F^2^ > 2sigma(F^2^) is used only for calculating R-factors(gt) etc. and is 
 not relevant to the choice of reflections for refinement.  R-factors based 
 on F^2^ are statistically about twice as large as those based on F, and R- 
 factors based on ALL data will be even larger. 
; 
 
_refine_ls_structure_factor_coef  Fsqd  
_refine_ls_matrix_type            full 
_refine_ls_weighting_scheme       calc  
_refine_ls_weighting_details 
 'calc w=1/[\s^2^(Fo^2^)+(0.0388P)^2^+0.0000P] where P=(Fo^2^+2Fc^2^)/3' 
_atom_sites_solution_primary      direct 
_atom_sites_solution_secondary    difmap 
_atom_sites_solution_hydrogens    geom 
_refine_ls_hydrogen_treatment     mixed 
_refine_ls_extinction_method      none 
_refine_ls_extinction_coef        ? 
_refine_ls_number_reflns          2217 
_refine_ls_number_parameters      162 
_refine_ls_number_restraints      0 
_refine_ls_R_factor_all           0.0665 
_refine_ls_R_factor_gt            0.0359 
_refine_ls_wR_factor_ref          0.0813 
_refine_ls_wR_factor_gt           0.0752 
_refine_ls_goodness_of_fit_ref    0.945 
_refine_ls_restrained_S_all       0.945 
_refine_ls_shift/su_max           0.001 
_refine_ls_shift/su_mean          0.000 
 
loop_ 
 _atom_site_label 
 _atom_site_type_symbol 
 _atom_site_fract_x 
 _atom_site_fract_y 
 _atom_site_fract_z 
 _atom_site_U_iso_or_equiv 
 _atom_site_adp_type 
 _atom_site_occupancy 
 _atom_site_symmetry_multiplicity 
 _atom_site_calc_flag 
 _atom_site_refinement_flags 
 _atom_site_disorder_assembly 
 _atom_site_disorder_group 
Eu1 Eu 0.15249(4) 0.429459(14) 0.70826(5) 0.01524(12) Uani 1 1 d . . . 
C6 C -0.1069(10) 0.3282(3) 0.5691(10) 0.0194(15) Uani 1 1 d . . . 
C1 C -0.2422(10) 0.2738(3) 0.5181(10) 0.0192(15) Uani 1 1 d . . . 
C2 C -0.4262(10) 0.2852(3) 0.4544(10) 0.0219(16) Uani 1 1 d . . . 
H3A H -0.4700 0.3276 0.4403 0.026 Uiso 1 1 calc R . . 
C3 C -0.5437(10) 0.2334(3) 0.4121(11) 0.0218(16) Uani 1 1 d . . . 
H4A H -0.6672 0.2408 0.3699 0.026 Uiso 1 1 calc R . . 
C5 C -0.1822(9) 0.2100(3) 0.5387(10) 0.0215(15) Uani 1 1 d . . . 
H5A H -0.0592 0.2015 0.5843 0.026 Uiso 1 1 calc R . . 
C4 C -0.3024(9) 0.1591(3) 0.4926(10) 0.0222(16) Uani 1 1 d . . . 
H6A H -0.2614 0.1163 0.5032 0.027 Uiso 1 1 calc R . . 
N1 N -0.4805(8) 0.1720(2) 0.4316(8) 0.0186(12) Uani 1 1 d . . . 
O1 O -0.1598(6) 0.3862(2) 0.5444(7) 0.0271(12) Uani 1 1 d . . . 
O2 O 0.0573(7) 0.3142(2) 0.6414(8) 0.0289(12) Uani 1 1 d . . . 
O3 O -0.5927(7) 0.1225(2) 0.3986(8) 0.0298(12) Uani 1 1 d . . . 
O7 O 0.2735(7) 0.4842(2) 0.1268(8) 0.0267(12) Uani 1 1 d . . . 
O6 O 0.0501(7) 0.4036(2) 0.0243(7) 0.0251(11) Uani 1 1 d . . . 
O5 O 0.2655(7) 0.3982(2) 0.3913(7) 0.0255(11) Uani 1 1 d . . . 
O4 O 0.0384(6) 0.4779(2) 0.3157(7) 0.0213(11) Uani 1 1 d . . . 
O8 O 0.3570(9) 0.5158(3) 0.7021(12) 0.0288(16) Uani 1 1 d . . . 
S1 S 0.1608(2) 0.44057(7) 0.2132(3) 0.0168(3) Uani 1 1 d . . . 
H8A H 0.380(15) 0.533(5) 0.655(17) 0.04(4) Uiso 1 1 d . . . 
H8B H 0.499(18) 0.506(6) 0.743(19) 0.15(6) Uiso 1 1 d . . . 
 
loop_ 
 _atom_site_aniso_label 
 _atom_site_aniso_U_11 
 _atom_site_aniso_U_22 
 _atom_site_aniso_U_33 
 _atom_site_aniso_U_23 
 _atom_site_aniso_U_13 
 _atom_site_aniso_U_12 
Eu1 0.0171(2) 0.01349(18) 0.01479(17) 0.00091(16) 0.00399(13) 0.00105(15) 
C6 0.025(4) 0.019(4) 0.015(3) 0.000(3) 0.006(3) 0.000(3) 
C1 0.025(4) 0.017(3) 0.016(3) -0.002(3) 0.006(3) -0.004(3) 
C2 0.034(5) 0.017(3) 0.017(3) -0.001(3) 0.009(3) 0.005(3) 
C3 0.019(4) 0.024(4) 0.021(4) 0.001(3) 0.003(3) -0.002(3) 
C5 0.021(4) 0.022(4) 0.022(4) -0.004(3) 0.007(3) -0.002(3) 
C4 0.027(4) 0.023(4) 0.017(3) 0.001(3) 0.006(3) 0.001(3) 
N1 0.022(3) 0.017(3) 0.014(3) 0.002(2) 0.002(2) -0.002(2) 
O1 0.030(3) 0.013(2) 0.032(3) 0.001(2) -0.002(2) -0.004(2) 
O2 0.020(3) 0.026(3) 0.037(3) -0.005(2) 0.004(2) -0.004(2) 
O3 0.029(3) 0.022(3) 0.035(3) 0.000(2) 0.004(2) -0.013(2) 
O7 0.025(3) 0.027(3) 0.029(3) 0.005(2) 0.010(2) -0.001(2) 
O6 0.033(3) 0.027(2) 0.016(2) -0.009(2) 0.009(2) -0.008(2) 
O5 0.033(3) 0.027(3) 0.018(2) 0.009(2) 0.010(2) 0.015(2) 
O4 0.027(3) 0.019(2) 0.019(3) -0.0038(19) 0.008(2) 0.003(2) 
O8 0.025(4) 0.027(3) 0.031(3) 0.010(3) 0.003(3) -0.007(3) 
S1 0.0198(9) 0.0148(8) 0.0160(8) 0.0017(7) 0.0053(7) 0.0033(7) 
 
_geom_special_details 
; 
 All esds (except the esd in the dihedral angle between two l.s. planes) 
 are estimated using the full covariance matrix.  The cell esds are taken 
 into account individually in the estimation of esds in distances, angles 
 and torsion angles; correlations between esds in cell parameters are only 
 used when they are defined by crystal symmetry.  An approximate (isotropic) 
 treatment of cell esds is used for estimating esds involving l.s. planes. 
; 
 
loop_ 
 _geom_bond_atom_site_label_1 
 _geom_bond_atom_site_label_2 
 _geom_bond_distance 
 _geom_bond_site_symmetry_2 
 _geom_bond_publ_flag 
Eu1 O3 2.263(5) 4_666 ? 
Eu1 O8 2.388(6) . ? 
Eu1 O4 2.390(4) 3_566 ? 
Eu1 O6 2.418(4) 1_556 ? 
Eu1 O2 2.481(5) . ? 
Eu1 O5 2.498(4) . ? 
Eu1 O1 2.506(5) . ? 
Eu1 O4 2.587(4) . ? 
Eu1 O7 2.783(5) 1_556 ? 
Eu1 C6 2.852(7) . ? 
Eu1 S1 3.1659(17) . ? 
Eu1 S1 3.1917(17) 1_556 ? 
C6 O2 1.256(8) . ? 
C6 O1 1.256(8) . ? 
C6 C1 1.504(9) . ? 
C1 C5 1.384(9) . ? 
C1 C2 1.386(10) . ? 
C2 C3 1.377(9) . ? 
C3 N1 1.346(8) . ? 
C5 C4 1.376(9) . ? 
C4 N1 1.349(8) . ? 
N1 O3 1.316(7) . ? 
O3 Eu1 2.263(5) 4_465 ? 
O7 S1 1.465(5) . ? 
O7 Eu1 2.783(5) 1_554 ? 
O6 S1 1.467(5) . ? 
O6 Eu1 2.418(4) 1_554 ? 
O5 S1 1.470(4) . ? 
O4 S1 1.506(4) . ? 
O4 Eu1 2.390(4) 3_566 ? 
S1 Eu1 3.1917(17) 1_554 ? 
 
loop_ 
 _geom_angle_atom_site_label_1 
 _geom_angle_atom_site_label_2 
 _geom_angle_atom_site_label_3 
 _geom_angle 
 _geom_angle_site_symmetry_1 
 _geom_angle_site_symmetry_3 
 _geom_angle_publ_flag 
O3 Eu1 O8 83.0(2) 4_666 . ? 
O3 Eu1 O4 147.04(16) 4_666 3_566 ? 
O8 Eu1 O4 79.0(2) . 3_566 ? 
O3 Eu1 O6 84.28(18) 4_666 1_556 ? 
O8 Eu1 O6 123.8(2) . 1_556 ? 
O4 Eu1 O6 83.20(15) 3_566 1_556 ? 
O3 Eu1 O2 79.14(17) 4_666 . ? 
O8 Eu1 O2 150.8(2) . . ? 
O4 Eu1 O2 127.01(16) 3_566 . ? 
O6 Eu1 O2 77.25(15) 1_556 . ? 
O3 Eu1 O5 81.49(16) 4_666 . ? 
O8 Eu1 O5 77.8(2) . . ? 
O4 Eu1 O5 120.59(14) 3_566 . ? 
O6 Eu1 O5 152.38(15) 1_556 . ? 
O2 Eu1 O5 76.89(16) . . ? 
O3 Eu1 O1 130.10(16) 4_666 . ? 
O8 Eu1 O1 145.5(2) . . ? 
O4 Eu1 O1 75.50(15) 3_566 . ? 
O6 Eu1 O1 75.86(15) 1_556 . ? 
O2 Eu1 O1 52.15(15) . . ? 
O5 Eu1 O1 95.59(16) . . ? 
O3 Eu1 O4 134.20(17) 4_666 . ? 
O8 Eu1 O4 75.1(2) . . ? 
O4 Eu1 O4 66.38(16) 3_566 . ? 
O6 Eu1 O4 141.12(15) 1_556 . ? 
O2 Eu1 O4 101.57(15) . . ? 
O5 Eu1 O4 55.03(13) . . ? 
O1 Eu1 O4 73.56(14) . . ? 
O3 Eu1 O7 71.39(15) 4_666 1_556 ? 
O8 Eu1 O7 70.9(2) . 1_556 ? 
O4 Eu1 O7 76.71(14) 3_566 1_556 ? 
O6 Eu1 O7 53.13(14) 1_556 1_556 ? 
O2 Eu1 O7 123.41(14) . 1_556 ? 
O5 Eu1 O7 140.44(16) . 1_556 ? 
O1 Eu1 O7 123.88(15) . 1_556 ? 
O4 Eu1 O7 133.54(13) . 1_556 ? 
O3 Eu1 C6 104.47(19) 4_666 . ? 
O8 Eu1 C6 161.8(2) . . ? 
O4 Eu1 C6 101.15(18) 3_566 . ? 
O6 Eu1 C6 74.02(16) 1_556 . ? 
O2 Eu1 C6 26.08(17) . . ? 
O5 Eu1 C6 86.77(17) . . ? 
O1 Eu1 C6 26.11(17) . . ? 
O4 Eu1 C6 88.20(16) . . ? 
O7 Eu1 C6 127.11(16) 1_556 . ? 
O3 Eu1 S1 107.30(13) 4_666 . ? 
O8 Eu1 S1 74.10(17) . . ? 
O4 Eu1 S1 93.99(10) 3_566 . ? 
O6 Eu1 S1 160.55(11) 1_556 . ? 
O2 Eu1 S1 89.41(12) . . ? 
O5 Eu1 S1 26.92(10) . . ? 
O1 Eu1 S1 84.78(11) . . ? 
O4 Eu1 S1 28.11(10) . . ? 
O7 Eu1 S1 144.88(10) 1_556 . ? 
C6 Eu1 S1 87.75(13) . . ? 
O3 Eu1 S1 74.81(13) 4_666 1_556 ? 
O8 Eu1 S1 98.20(17) . 1_556 ? 
O4 Eu1 S1 80.73(10) 3_566 1_556 ? 
O6 Eu1 S1 25.94(11) 1_556 1_556 ? 
O2 Eu1 S1 99.12(12) . 1_556 ? 
O5 Eu1 S1 156.29(11) . 1_556 ? 
O1 Eu1 S1 100.23(11) . 1_556 ? 
O4 Eu1 S1 147.09(10) . 1_556 ? 
O7 Eu1 S1 27.31(10) 1_556 1_556 ? 
C6 Eu1 S1 99.80(13) . 1_556 ? 
S1 Eu1 S1 171.47(5) . 1_556 ? 
O2 C6 O1 121.5(6) . . ? 
O2 C6 C1 118.7(6) . . ? 
O1 C6 C1 119.8(6) . . ? 
O2 C6 Eu1 60.2(3) . . ? 
O1 C6 Eu1 61.4(3) . . ? 
C1 C6 Eu1 174.6(4) . . ? 
C5 C1 C2 118.6(6) . . ? 
C5 C1 C6 119.3(6) . . ? 
C2 C1 C6 122.1(6) . . ? 
C3 C2 C1 119.5(6) . . ? 
N1 C3 C2 120.3(7) . . ? 
C4 C5 C1 120.8(6) . . ? 
N1 C4 C5 119.1(6) . . ? 
O3 N1 C3 120.3(6) . . ? 
O3 N1 C4 117.9(5) . . ? 
C3 N1 C4 121.8(6) . . ? 
C6 O1 Eu1 92.5(4) . . ? 
C6 O2 Eu1 93.7(4) . . ? 
N1 O3 Eu1 152.2(4) . 4_465 ? 
S1 O7 Eu1 92.1(2) . 1_554 ? 
S1 O6 Eu1 107.9(2) . 1_554 ? 
S1 O5 Eu1 102.8(2) . . ? 
S1 O4 Eu1 146.6(3) . 3_566 ? 
S1 O4 Eu1 97.8(2) . . ? 
Eu1 O4 Eu1 113.62(15) 3_566 . ? 
O7 S1 O6 106.4(3) . . ? 
O7 S1 O5 113.1(3) . . ? 
O6 S1 O5 112.5(3) . . ? 
O7 S1 O4 111.6(3) . . ? 
O6 S1 O4 108.8(3) . . ? 
O5 S1 O4 104.3(3) . . ? 
O7 S1 Eu1 126.9(2) . . ? 
O6 S1 Eu1 126.66(19) . . ? 
O5 S1 Eu1 50.30(18) . . ? 
O4 S1 Eu1 54.05(17) . . ? 
O7 S1 Eu1 60.63(19) . 1_554 ? 
O6 S1 Eu1 46.12(18) . 1_554 ? 
O5 S1 Eu1 125.04(19) . 1_554 ? 
O4 S1 Eu1 129.56(18) . 1_554 ? 
Eu1 S1 Eu1 171.47(5) . 1_554 ? 
 
loop_ 
 _geom_hbond_atom_site_label_D 
 _geom_hbond_atom_site_label_H 
 _geom_hbond_atom_site_label_A 
 _geom_hbond_distance_DH 
 _geom_hbond_distance_HA 
 _geom_hbond_distance_DA 
 _geom_hbond_angle_DHA 
 _geom_hbond_site_symmetry_A 
O8 H8B O7  1.07(13) 1.73(13) 2.755(8) 158(10) 3_666 
 
_diffrn_measured_fraction_theta_max    0.998 
_diffrn_reflns_theta_full              27.50 
_diffrn_measured_fraction_theta_full   0.998 
_refine_diff_density_max    1.431 
_refine_diff_density_min   -1.741 
_refine_diff_density_rms    0.264 

#===END


## Crystallographic Data of Complex 7

data_7 
 
_audit_creation_method            SHELXL-97 
_chemical_name_systematic 
; 
 ? 
; 
_chemical_name_common             ? 
_chemical_melting_point           ? 
_chemical_formula_moiety          ? 
_chemical_formula_sum 
 'C6 H6 Gd N O8 S' 
_chemical_formula_weight          409.43 
 
loop_ 
 _atom_type_symbol 
 _atom_type_description 
 _atom_type_scat_dispersion_real 
 _atom_type_scat_dispersion_imag 
 _atom_type_scat_source 
 'C'  'C'   0.0033   0.0016 
 'International Tables Vol C Tables 4.2.6.8 and 6.1.1.4' 
 'H'  'H'   0.0000   0.0000 
 'International Tables Vol C Tables 4.2.6.8 and 6.1.1.4' 
 'N'  'N'   0.0061   0.0033 
 'International Tables Vol C Tables 4.2.6.8 and 6.1.1.4' 
 'O'  'O'   0.0106   0.0060 
 'International Tables Vol C Tables 4.2.6.8 and 6.1.1.4' 
 'Gd'  'Gd'  -0.1653   3.9035 
 'International Tables Vol C Tables 4.2.6.8 and 6.1.1.4' 
 'S'  'S'   0.1246   0.1234 
 'International Tables Vol C Tables 4.2.6.8 and 6.1.1.4' 
 
_symmetry_cell_setting            'monoclinic' 
_symmetry_space_group_name_H-M    'P21/c' 
 
loop_ 
 _symmetry_equiv_pos_as_xyz 
 'x, y, z' 
 '-x, y+1/2, -z+1/2' 
 '-x, -y, -z' 
 'x, -y-1/2, z-1/2' 
 
_cell_length_a                    7.75000(10) 
_cell_length_b                    20.4884(5) 
_cell_length_c                    6.3379(2) 
_cell_angle_alpha                 90.00 
_cell_angle_beta                  106.7190(10) 
_cell_angle_gamma                 90.00 
_cell_volume                      963.82(4) 
_cell_formula_units_Z             4 
_cell_measurement_temperature     293(2) 
_cell_measurement_reflns_used     12688
_cell_measurement_theta_min        3.50
_cell_measurement_theta_max        27.47
 
_exptl_crystal_description        'flake' 
_exptl_crystal_colour             'colorless' 
_exptl_crystal_size_max           0.15 
_exptl_crystal_size_mid           0.09 
_exptl_crystal_size_min           0.02 
_exptl_crystal_density_meas       ? 
_exptl_crystal_density_diffrn     2.822 
_exptl_crystal_density_method     'not measured' 
_exptl_crystal_F_000              772 
_exptl_absorpt_coefficient_mu     7.132 
_exptl_absorpt_correction_type    empirical 
_exptl_absorpt_correction_T_min   0.609 
_exptl_absorpt_correction_T_max   0.873 
_exptl_absorpt_process_details    '(Blessing, 1995, 1997)' 
 
_exptl_special_details 
; 
 ? 
; 
 
_diffrn_ambient_temperature       293(2) 
_diffrn_radiation_wavelength      0.71073 
_diffrn_radiation_type            MoK\a 
_diffrn_radiation_source          'fine-focus sealed tube' 
_diffrn_radiation_monochromator   graphite 
_diffrn_measurement_device_type   'NONIUS KappaCCD Diffractometer' 
_diffrn_measurement_method        'CCD' 
_diffrn_detector_area_resol_mean  0.76 
_diffrn_standards_number          ? 
_diffrn_standards_interval_count  ? 
_diffrn_standards_interval_time   ? 
_diffrn_standards_decay_%         none 
_diffrn_reflns_number             17123 
_diffrn_reflns_av_R_equivalents   0.0935 
_diffrn_reflns_av_sigmaI/netI     0.0627 
_diffrn_reflns_limit_h_min        -10 
_diffrn_reflns_limit_h_max        10 
_diffrn_reflns_limit_k_min        -26 
_diffrn_reflns_limit_k_max        26 
_diffrn_reflns_limit_l_min        -8 
_diffrn_reflns_limit_l_max        8 
_diffrn_reflns_theta_min          3.50 
_diffrn_reflns_theta_max          27.47 
_reflns_number_total              2206 
_reflns_number_gt                 1602 
_reflns_threshold_expression      >2sigma(I) 
 
_computing_data_collection        'KappaCCD (Nonius B. V., 1998)' 
_computing_cell_refinement        'HKL Scalepack (Otwinowski & Minor, 1997)' 
_computing_data_reduction
'HKL Denzo (Otwinowski & Minor, 1997) & maXus (Mackay et al., 1998)'
_computing_structure_solution     'SHELXS-97 (Sheldrick, 1997)' 
_computing_structure_refinement   'SHELXL-97 (Sheldrick, 1997)' 
_computing_molecular_graphics     'Bruker SHELXTL V5.1 (Sheldrick, 1998)' 
_computing_publication_material   'SHELXL-97 (Sheldrick, 1997)' 

_publ_section_references
;
collect:
"Collect" data collection software, Nonius B.V., Delft, The Netherlands, 1998.

HKL Scalepack & HKL Denzo:
Z. Otwinowski and W. Minor, " Processing of X-ray Diffraction Data Collected
in Oscillation Mode ", Methods in Enzymology, Volume 276: Macromolecular
Crystallography, part A, p.307-326, 1997,C.W. Carter, Jr. & R.M. Sweet,
Eds., Academic Press, London.

absorption correction:
R.H. Blessing (1995) Acta Cryst. A51, 33-37.
R.H. Blessing (1997) J.Appl. Cryst. 30, 421-426.

maXus: 
S.Mackay, C.J.Gilmore, C.Edwards, M. Tremayne, N. Stuart, K.Shankland
"maXus: a computer program for the solution and refinement of crystal
structures from diffraction data", University of Glasgow, Scotland, UK,
Nonius BV, Delft, The Netherlands and MacScience Co. Ltd., Yokohama,
Japan (1998).

Sheldrick, G. M. (1998). SHELXTL Version 5.1. Bruker Analytical X-ray
Instruments Inc., Madison, Wisconsin, USA.

Sheldrick, G. M. (1997). SHELX-97. PC Version. University of Goettingen,
Germany.
;
 
_refine_special_details 
; 
 Refinement of F^2^ against ALL reflections.  The weighted R-factor wR and 
 goodness of fit S are based on F^2^, conventional R-factors R are based 
 on F, with F set to zero for negative F^2^. The threshold expression of 
 F^2^ > 2sigma(F^2^) is used only for calculating R-factors(gt) etc. and is 
 not relevant to the choice of reflections for refinement.  R-factors based 
 on F^2^ are statistically about twice as large as those based on F, and R- 
 factors based on ALL data will be even larger. 
; 
 
_refine_ls_structure_factor_coef  Fsqd  
_refine_ls_matrix_type            full 
_refine_ls_weighting_scheme       calc  
_refine_ls_weighting_details 
 'calc w=1/[\s^2^(Fo^2^)+(0.0327P)^2^+0.0000P] where P=(Fo^2^+2Fc^2^)/3' 
_atom_sites_solution_primary      direct 
_atom_sites_solution_secondary    difmap 
_atom_sites_solution_hydrogens    geom 
_refine_ls_hydrogen_treatment     mixed 
_refine_ls_extinction_method      none 
_refine_ls_extinction_coef        ? 
_refine_ls_number_reflns          2206 
_refine_ls_number_parameters      162 
_refine_ls_number_restraints      0 
_refine_ls_R_factor_all           0.0535 
_refine_ls_R_factor_gt            0.0314 
_refine_ls_wR_factor_ref          0.0646 
_refine_ls_wR_factor_gt           0.0610 
_refine_ls_goodness_of_fit_ref    0.925 
_refine_ls_restrained_S_all       0.925 
_refine_ls_shift/su_max           0.001 
_refine_ls_shift/su_mean          0.000 
 
loop_ 
 _atom_site_label 
 _atom_site_type_symbol 
 _atom_site_fract_x 
 _atom_site_fract_y 
 _atom_site_fract_z 
 _atom_site_U_iso_or_equiv 
 _atom_site_adp_type 
 _atom_site_occupancy 
 _atom_site_symmetry_multiplicity 
 _atom_site_calc_flag 
 _atom_site_refinement_flags 
 _atom_site_disorder_assembly 
 _atom_site_disorder_group 
Gd1 Gd 0.15119(3) 0.429202(12) 0.70517(4) 0.01629(10) Uani 1 1 d . . . 
C6 C -0.1069(8) 0.3280(3) 0.5682(8) 0.0218(12) Uani 1 1 d . . . 
C1 C -0.2420(7) 0.2734(2) 0.5174(8) 0.0189(12) Uani 1 1 d . . . 
C2 C -0.4260(7) 0.2850(3) 0.4535(8) 0.0215(12) Uani 1 1 d . . . 
H3A H -0.4696 0.3275 0.4385 0.026 Uiso 1 1 calc R . . 
C3 C -0.5440(8) 0.2330(3) 0.4125(8) 0.0234(13) Uani 1 1 d . . . 
H4A H -0.6675 0.2406 0.3719 0.028 Uiso 1 1 calc R . . 
C5 C -0.1821(7) 0.2089(3) 0.5379(8) 0.0222(12) Uani 1 1 d . . . 
H5A H -0.0592 0.2001 0.5839 0.027 Uiso 1 1 calc R . . 
C4 C -0.3021(7) 0.1583(3) 0.4911(8) 0.0237(13) Uani 1 1 d . . . 
H6A H -0.2613 0.1154 0.5004 0.028 Uiso 1 1 calc R . . 
N1 N -0.4816(6) 0.1712(2) 0.4309(7) 0.0196(10) Uani 1 1 d . . . 
O1 O -0.1596(5) 0.38633(18) 0.5431(6) 0.0267(10) Uani 1 1 d . . . 
O2 O 0.0573(5) 0.31398(18) 0.6407(7) 0.0290(9) Uani 1 1 d . . . 
O3 O -0.5931(5) 0.12104(18) 0.3976(7) 0.0306(10) Uani 1 1 d . . . 
O7 O 0.2745(5) 0.4855(2) 0.1301(7) 0.0317(10) Uani 1 1 d . . . 
O6 O 0.0520(5) 0.40459(19) 0.0211(6) 0.0266(9) Uani 1 1 d . . . 
O5 O 0.2625(5) 0.39760(19) 0.3898(6) 0.0271(9) Uani 1 1 d . . . 
O4 O 0.0387(5) 0.47795(17) 0.3170(5) 0.0192(8) Uani 1 1 d . . . 
O8 O 0.3538(6) 0.5154(2) 0.7016(8) 0.0288(10) Uani 1 1 d . . . 
S1 S 0.16074(18) 0.44123(6) 0.2134(2) 0.0185(3) Uani 1 1 d . . . 
H8A H 0.344(12) 0.545(4) 0.626(15) 0.08(3) Uiso 1 1 d . . . 
H8B H 0.460(10) 0.512(3) 0.762(11) 0.05(3) Uiso 1 1 d . . . 
 
loop_ 
 _atom_site_aniso_label 
 _atom_site_aniso_U_11 
 _atom_site_aniso_U_22 
 _atom_site_aniso_U_33 
 _atom_site_aniso_U_23 
 _atom_site_aniso_U_13 
 _atom_site_aniso_U_12 
Gd1 0.01622(14) 0.01375(14) 0.01831(14) 0.00110(12) 0.00404(10) 0.00111(12) 
C6 0.026(3) 0.024(3) 0.017(3) -0.005(2) 0.007(2) -0.006(2) 
C1 0.022(3) 0.019(3) 0.018(3) 0.000(2) 0.009(2) -0.004(2) 
C2 0.026(3) 0.019(3) 0.019(3) 0.001(2) 0.006(2) 0.002(2) 
C3 0.020(3) 0.027(3) 0.022(3) -0.001(2) 0.003(2) -0.002(2) 
C5 0.021(3) 0.019(3) 0.023(3) -0.005(2) 0.002(2) -0.003(2) 
C4 0.027(3) 0.020(3) 0.022(3) -0.001(2) 0.004(3) 0.000(2) 
N1 0.021(3) 0.018(2) 0.018(2) -0.0012(18) 0.003(2) -0.0043(19) 
O1 0.028(2) 0.016(2) 0.030(2) 0.0003(17) -0.0016(19) -0.0024(16) 
O2 0.023(2) 0.021(2) 0.043(2) -0.0060(18) 0.009(2) -0.0058(17) 
O3 0.027(2) 0.024(2) 0.037(2) -0.0027(18) 0.0016(19) -0.0139(18) 
O7 0.024(2) 0.031(2) 0.043(2) 0.009(2) 0.015(2) -0.0013(18) 
O6 0.032(2) 0.025(2) 0.022(2) -0.0062(18) 0.0069(18) -0.0024(18) 
O5 0.034(2) 0.026(2) 0.022(2) 0.0061(17) 0.0081(18) 0.0149(19) 
O4 0.0161(19) 0.021(2) 0.0205(19) 0.0030(16) 0.0044(16) 0.0044(16) 
O8 0.023(3) 0.025(2) 0.035(3) 0.010(2) 0.002(2) -0.0043(19) 
S1 0.0185(6) 0.0183(7) 0.0194(6) 0.0020(6) 0.0066(5) 0.0023(6) 
 
_geom_special_details 
; 
 All esds (except the esd in the dihedral angle between two l.s. planes) 
 are estimated using the full covariance matrix.  The cell esds are taken 
 into account individually in the estimation of esds in distances, angles 
 and torsion angles; correlations between esds in cell parameters are only 
 used when they are defined by crystal symmetry.  An approximate (isotropic) 
 treatment of cell esds is used for estimating esds involving l.s. planes. 
; 
 
loop_ 
 _geom_bond_atom_site_label_1 
 _geom_bond_atom_site_label_2 
 _geom_bond_distance 
 _geom_bond_site_symmetry_2 
 _geom_bond_publ_flag 
Gd1 O3 2.254(4) 4_666 ? 
Gd1 O8 2.367(4) . ? 
Gd1 O4 2.384(3) 3_566 ? 
Gd1 O6 2.396(4) 1_556 ? 
Gd1 O2 2.469(4) . ? 
Gd1 O5 2.480(4) . ? 
Gd1 O1 2.491(4) . ? 
Gd1 O4 2.564(3) . ? 
Gd1 O7 2.831(4) 1_556 ? 
Gd1 C6 2.839(5) . ? 
Gd1 S1 3.1482(14) . ? 
Gd1 S1 3.2104(13) 1_556 ? 
C6 O2 1.256(7) . ? 
C6 O1 1.259(7) . ? 
C6 C1 1.502(7) . ? 
C1 C2 1.386(8) . ? 
C1 C5 1.395(8) . ? 
C2 C3 1.379(8) . ? 
C3 N1 1.349(7) . ? 
C5 C4 1.367(7) . ? 
C4 N1 1.358(7) . ? 
N1 O3 1.320(5) . ? 
O3 Gd1 2.254(4) 4_465 ? 
O7 S1 1.465(4) . ? 
O7 Gd1 2.831(4) 1_554 ? 
O6 S1 1.473(4) . ? 
O6 Gd1 2.396(4) 1_554 ? 
O5 S1 1.471(4) . ? 
O4 S1 1.500(4) . ? 
O4 Gd1 2.384(3) 3_566 ? 
S1 Gd1 3.2104(13) 1_554 ? 
 
loop_ 
 _geom_angle_atom_site_label_1 
 _geom_angle_atom_site_label_2 
 _geom_angle_atom_site_label_3 
 _geom_angle 
 _geom_angle_site_symmetry_1 
 _geom_angle_site_symmetry_3 
 _geom_angle_publ_flag 
O3 Gd1 O8 82.15(16) 4_666 . ? 
O3 Gd1 O4 145.86(13) 4_666 3_566 ? 
O8 Gd1 O4 78.71(15) . 3_566 ? 
O3 Gd1 O6 83.99(15) 4_666 1_556 ? 
O8 Gd1 O6 122.55(15) . 1_556 ? 
O4 Gd1 O6 82.89(12) 3_566 1_556 ? 
O3 Gd1 O2 79.88(14) 4_666 . ? 
O8 Gd1 O2 151.16(16) . . ? 
O4 Gd1 O2 127.27(12) 3_566 . ? 
O6 Gd1 O2 77.70(13) 1_556 . ? 
O3 Gd1 O5 82.04(13) 4_666 . ? 
O8 Gd1 O5 78.55(15) . . ? 
O4 Gd1 O5 120.83(12) 3_566 . ? 
O6 Gd1 O5 152.66(13) 1_556 . ? 
O2 Gd1 O5 76.78(13) . . ? 
O3 Gd1 O1 131.09(14) 4_666 . ? 
O8 Gd1 O1 145.54(14) . . ? 
O4 Gd1 O1 75.52(12) 3_566 . ? 
O6 Gd1 O1 76.46(13) 1_556 . ? 
O2 Gd1 O1 52.47(12) . . ? 
O5 Gd1 O1 95.44(13) . . ? 
O3 Gd1 O4 134.44(14) 4_666 . ? 
O8 Gd1 O4 75.16(14) . . ? 
O4 Gd1 O4 66.35(13) 3_566 . ? 
O6 Gd1 O4 141.39(12) 1_556 . ? 
O2 Gd1 O4 102.17(12) . . ? 
O5 Gd1 O4 55.22(11) . . ? 
O1 Gd1 O4 73.74(12) . . ? 
O3 Gd1 O7 70.59(13) 4_666 1_556 ? 
O8 Gd1 O7 70.25(14) . 1_556 ? 
O4 Gd1 O7 76.40(11) 3_566 1_556 ? 
O6 Gd1 O7 52.58(12) 1_556 1_556 ? 
O2 Gd1 O7 123.33(12) . 1_556 ? 
O5 Gd1 O7 140.59(12) . 1_556 ? 
O1 Gd1 O7 123.90(12) . 1_556 ? 
O4 Gd1 O7 133.05(11) . 1_556 ? 
O3 Gd1 C6 105.32(16) 4_666 . ? 
O8 Gd1 C6 162.38(16) . . ? 
O4 Gd1 C6 101.32(15) 3_566 . ? 
O6 Gd1 C6 74.61(14) 1_556 . ? 
O2 Gd1 C6 26.21(15) . . ? 
O5 Gd1 C6 86.60(15) . . ? 
O1 Gd1 C6 26.29(14) . . ? 
O4 Gd1 C6 88.62(13) . . ? 
O7 Gd1 C6 127.14(13) 1_556 . ? 
O3 Gd1 S1 107.69(11) 4_666 . ? 
O8 Gd1 S1 74.20(12) . . ? 
O4 Gd1 S1 93.96(8) 3_566 . ? 
O6 Gd1 S1 161.51(9) 1_556 . ? 
O2 Gd1 S1 90.04(10) . . ? 
O5 Gd1 S1 27.11(8) . . ? 
O1 Gd1 S1 85.10(9) . . ? 
O4 Gd1 S1 28.14(8) . . ? 
O7 Gd1 S1 144.31(8) 1_556 . ? 
C6 Gd1 S1 88.26(11) . . ? 
O3 Gd1 S1 74.29(11) 4_666 1_556 ? 
O8 Gd1 S1 97.38(12) . 1_556 ? 
O4 Gd1 S1 80.42(8) 3_566 1_556 ? 
O6 Gd1 S1 25.56(9) 1_556 1_556 ? 
O2 Gd1 S1 99.21(10) . 1_556 ? 
O5 Gd1 S1 156.33(9) . 1_556 ? 
O1 Gd1 S1 100.45(9) . 1_556 ? 
O4 Gd1 S1 146.73(8) . 1_556 ? 
O7 Gd1 S1 27.14(8) 1_556 1_556 ? 
C6 Gd1 S1 100.01(11) . 1_556 ? 
S1 Gd1 S1 170.75(5) . 1_556 ? 
O2 C6 O1 121.4(5) . . ? 
O2 C6 C1 118.6(5) . . ? 
O1 C6 C1 120.0(5) . . ? 
O2 C6 Gd1 60.2(3) . . ? 
O1 C6 Gd1 61.2(3) . . ? 
C1 C6 Gd1 174.8(4) . . ? 
C2 C1 C5 118.4(5) . . ? 
C2 C1 C6 122.0(5) . . ? 
C5 C1 C6 119.5(5) . . ? 
C3 C2 C1 119.6(5) . . ? 
N1 C3 C2 120.5(5) . . ? 
C4 C5 C1 120.7(5) . . ? 
N1 C4 C5 119.4(5) . . ? 
O3 N1 C3 121.0(5) . . ? 
O3 N1 C4 117.6(4) . . ? 
C3 N1 C4 121.3(5) . . ? 
C6 O1 Gd1 92.5(3) . . ? 
C6 O2 Gd1 93.5(3) . . ? 
N1 O3 Gd1 151.0(3) . 4_465 ? 
S1 O7 Gd1 91.00(18) . 1_554 ? 
S1 O6 Gd1 109.9(2) . 1_554 ? 
S1 O5 Gd1 102.66(19) . . ? 
S1 O4 Gd1 146.2(2) . 3_566 ? 
S1 O4 Gd1 98.12(16) . . ? 
Gd1 O4 Gd1 113.65(13) 3_566 . ? 
O7 S1 O5 113.8(2) . . ? 
O7 S1 O6 106.1(2) . . ? 
O5 S1 O6 111.9(2) . . ? 
O7 S1 O4 111.6(2) . . ? 
O5 S1 O4 103.9(2) . . ? 
O6 S1 O4 109.6(2) . . ? 
O7 S1 Gd1 126.39(17) . . ? 
O5 S1 Gd1 50.23(15) . . ? 
O6 S1 Gd1 127.50(17) . . ? 
O4 S1 Gd1 53.74(13) . . ? 
O7 S1 Gd1 61.86(17) . 1_554 ? 
O5 S1 Gd1 124.64(16) . 1_554 ? 
O6 S1 Gd1 44.57(16) . 1_554 ? 
O4 S1 Gd1 129.97(14) . 1_554 ? 
Gd1 S1 Gd1 170.74(5) . 1_554 ? 
 
loop_ 
 _geom_hbond_atom_site_label_D 
 _geom_hbond_atom_site_label_H 
 _geom_hbond_atom_site_label_A 
 _geom_hbond_distance_DH 
 _geom_hbond_distance_HA 
 _geom_hbond_distance_DA 
 _geom_hbond_angle_DHA 
 _geom_hbond_site_symmetry_A 
O8 H8B O7  0.81(8) 1.97(8) 2.769(6) 170(7) 3_666 
 
_diffrn_measured_fraction_theta_max    0.998 
_diffrn_reflns_theta_full              27.47 
_diffrn_measured_fraction_theta_full   0.998 
_refine_diff_density_max    1.051 
_refine_diff_density_min   -1.728 
_refine_diff_density_rms    0.221 

#===END


## Crystallographic Data of Complex 8

data_8 
 
_audit_creation_method            SHELXL-97 
_chemical_name_systematic 
; 
 ? 
; 
_chemical_name_common             ? 
_chemical_melting_point           ? 
_chemical_formula_moiety          ? 
_chemical_formula_sum 
 'C6 H6 N O8 S Tb' 
_chemical_formula_weight          411.10 
 
loop_ 
 _atom_type_symbol 
 _atom_type_description 
 _atom_type_scat_dispersion_real 
 _atom_type_scat_dispersion_imag 
 _atom_type_scat_source 
 'C'  'C'   0.0033   0.0016 
 'International Tables Vol C Tables 4.2.6.8 and 6.1.1.4' 
 'H'  'H'   0.0000   0.0000 
 'International Tables Vol C Tables 4.2.6.8 and 6.1.1.4' 
 'N'  'N'   0.0061   0.0033 
 'International Tables Vol C Tables 4.2.6.8 and 6.1.1.4' 
 'O'  'O'   0.0106   0.0060 
 'International Tables Vol C Tables 4.2.6.8 and 6.1.1.4' 
 'Tb'  'Tb'  -0.1723   4.1537 
 'International Tables Vol C Tables 4.2.6.8 and 6.1.1.4' 
 'S'  'S'   0.1246   0.1234 
 'International Tables Vol C Tables 4.2.6.8 and 6.1.1.4' 
 
_symmetry_cell_setting            'monoclinic' 
_symmetry_space_group_name_H-M    'P21/c' 
 
loop_ 
 _symmetry_equiv_pos_as_xyz 
 'x, y, z' 
 '-x, y+1/2, -z+1/2' 
 '-x, -y, -z' 
 'x, -y-1/2, z-1/2' 
 
_cell_length_a                    7.7370(2) 
_cell_length_b                    20.3121(6) 
_cell_length_c                    6.3704(3) 
_cell_angle_alpha                 90.00 
_cell_angle_beta                  106.3832(10) 
_cell_angle_gamma                 90.00 
_cell_volume                      960.49(6) 
_cell_formula_units_Z             4 
_cell_measurement_temperature     293(2) 
_cell_measurement_reflns_used     11316
_cell_measurement_theta_min       3.40 
_cell_measurement_theta_max       27.50 
 
_exptl_crystal_description        'flake' 
_exptl_crystal_colour             'colorless' 
_exptl_crystal_size_max           0.20
_exptl_crystal_size_mid           0.11 
_exptl_crystal_size_min           0.01 
_exptl_crystal_density_meas       ? 
_exptl_crystal_density_diffrn     2.843 
_exptl_crystal_density_method     'not measured' 
_exptl_crystal_F_000              776 
_exptl_absorpt_coefficient_mu     7.615 
_exptl_absorpt_correction_type    empirical 
_exptl_absorpt_correction_T_min   0.496 
_exptl_absorpt_correction_T_max   0.928 
_exptl_absorpt_process_details    '(Blessing, 1995, 1997)' 
 
_exptl_special_details 
; 
 ? 
; 
 
_diffrn_ambient_temperature       293(2) 
_diffrn_radiation_wavelength      0.71073 
_diffrn_radiation_type            MoK\a 
_diffrn_radiation_source          'fine-focus sealed tube' 
_diffrn_radiation_monochromator   graphite 
_diffrn_measurement_device_type   'NONIUS KappaCCD Diffractometer' 
_diffrn_measurement_method        'CCD' 
_diffrn_detector_area_resol_mean  0.76 
_diffrn_standards_number          ? 
_diffrn_standards_interval_count  ? 
_diffrn_standards_interval_time   ? 
_diffrn_standards_decay_%         none 
_diffrn_reflns_number             16380 
_diffrn_reflns_av_R_equivalents   0.1219 
_diffrn_reflns_av_sigmaI/netI     0.0934 
_diffrn_reflns_limit_h_min        -10 
_diffrn_reflns_limit_h_max        10 
_diffrn_reflns_limit_k_min        -26 
_diffrn_reflns_limit_k_max        26 
_diffrn_reflns_limit_l_min        -8 
_diffrn_reflns_limit_l_max        8 
_diffrn_reflns_theta_min          3.40 
_diffrn_reflns_theta_max          27.50 
_reflns_number_total              2202 
_reflns_number_gt                 1472 
_reflns_threshold_expression      >2sigma(I) 
 
_computing_data_collection        'KappaCCD (Nonius B. V., 1998)' 
_computing_cell_refinement        'HKL Scalepack (Otwinowski & Minor, 1997)' 
_computing_data_reduction
'HKL Denzo (Otwinowski & Minor, 1997) & maXus (Mackay et al., 1998)'
_computing_structure_solution     'SHELXS-97 (Sheldrick, 1997)' 
_computing_structure_refinement   'SHELXL-97 (Sheldrick, 1997)' 
_computing_molecular_graphics     'Bruker SHELXTL V5.1 (Sheldrick, 1998)' 
_computing_publication_material   'SHELXL-97 (Sheldrick, 1997)' 

_publ_section_references
;
collect:
"Collect" data collection software, Nonius B.V., Delft, The Netherlands, 1998.

HKL Scalepack & HKL Denzo:
Z. Otwinowski and W. Minor, " Processing of X-ray Diffraction Data Collected
in Oscillation Mode ", Methods in Enzymology, Volume 276: Macromolecular
Crystallography, part A, p.307-326, 1997,C.W. Carter, Jr. & R.M. Sweet,
Eds., Academic Press, London.

absorption correction:
R.H. Blessing (1995) Acta Cryst. A51, 33-37.
R.H. Blessing (1997) J.Appl. Cryst. 30, 421-426.

maXus: 
S.Mackay, C.J.Gilmore, C.Edwards, M. Tremayne, N. Stuart, K.Shankland
"maXus: a computer program for the solution and refinement of crystal
structures from diffraction data", University of Glasgow, Scotland, UK,
Nonius BV, Delft, The Netherlands and MacScience Co. Ltd., Yokohama,
Japan (1998).

Sheldrick, G. M. (1998). SHELXTL Version 5.1. Bruker Analytical X-ray
Instruments Inc., Madison, Wisconsin, USA.

Sheldrick, G. M. (1997). SHELX-97. PC Version. University of Goettingen,
Germany.
;
 
_refine_special_details 
; 
 Refinement of F^2^ against ALL reflections.  The weighted R-factor wR and 
 goodness of fit S are based on F^2^, conventional R-factors R are based 
 on F, with F set to zero for negative F^2^. The threshold expression of 
 F^2^ > 2sigma(F^2^) is used only for calculating R-factors(gt) etc. and is 
 not relevant to the choice of reflections for refinement.  R-factors based 
 on F^2^ are statistically about twice as large as those based on F, and R- 
 factors based on ALL data will be even larger. 
; 
 
_refine_ls_structure_factor_coef  Fsqd  
_refine_ls_matrix_type            full 
_refine_ls_weighting_scheme       calc  
_refine_ls_weighting_details 
 'calc w=1/[\s^2^(Fo^2^)+(0.0400P)^2^+0.0000P] where P=(Fo^2^+2Fc^2^)/3' 
_atom_sites_solution_primary      direct 
_atom_sites_solution_secondary    difmap 
_atom_sites_solution_hydrogens    geom 
_refine_ls_hydrogen_treatment     mixed 
_refine_ls_extinction_method      none 
_refine_ls_extinction_coef        ? 
_refine_ls_number_reflns          2202 
_refine_ls_number_parameters      162 
_refine_ls_number_restraints      3 
_refine_ls_R_factor_all           0.0749 
_refine_ls_R_factor_gt            0.0395 
_refine_ls_wR_factor_ref          0.0806 
_refine_ls_wR_factor_gt           0.0745 
_refine_ls_goodness_of_fit_ref    0.903 
_refine_ls_restrained_S_all       0.903 
_refine_ls_shift/su_max           0.001 
_refine_ls_shift/su_mean          0.000 
 
loop_ 
 _atom_site_label 
 _atom_site_type_symbol 
 _atom_site_fract_x 
 _atom_site_fract_y 
 _atom_site_fract_z 
 _atom_site_U_iso_or_equiv 
 _atom_site_adp_type 
 _atom_site_occupancy 
 _atom_site_symmetry_multiplicity 
 _atom_site_calc_flag 
 _atom_site_refinement_flags 
 _atom_site_disorder_assembly 
 _atom_site_disorder_group 
Tb1 Tb 0.14820(5) 0.428385(16) 0.69792(5) 0.01656(12) Uani 1 1 d . . . 
C6 C -0.1034(11) 0.3263(4) 0.5696(11) 0.0224(18) Uani 1 1 d . . . 
C1 C -0.2415(11) 0.2722(4) 0.5176(11) 0.0198(17) Uani 1 1 d . . . 
C2 C -0.4252(10) 0.2831(4) 0.4536(11) 0.0206(17) Uani 1 1 d . . . 
H3A H -0.4681 0.3261 0.4403 0.025 Uiso 1 1 calc R . . 
C3 C -0.5456(11) 0.2319(4) 0.4092(11) 0.0213(17) Uani 1 1 d . . . 
H4A H -0.6690 0.2399 0.3667 0.026 Uiso 1 1 calc R . . 
C5 C -0.1814(10) 0.2070(4) 0.5373(11) 0.0201(17) Uani 1 1 d . . . 
H5A H -0.0586 0.1981 0.5824 0.024 Uiso 1 1 calc R . . 
C4 C -0.3035(10) 0.1557(4) 0.4903(11) 0.0240(18) Uani 1 1 d . . . 
H6A H -0.2638 0.1122 0.5010 0.029 Uiso 1 1 calc R . . 
N1 N -0.4815(8) 0.1695(3) 0.4285(9) 0.0170(14) Uani 1 1 d . . . 
O1 O -0.1584(7) 0.3854(2) 0.5439(8) 0.0270(13) Uani 1 1 d . . . 
O2 O 0.0582(8) 0.3127(2) 0.6444(9) 0.0302(13) Uani 1 1 d . . . 
O3 O -0.5932(7) 0.1190(3) 0.3913(9) 0.0306(14) Uani 1 1 d . . . 
O7 O 0.2831(7) 0.4891(3) 0.1517(9) 0.0345(14) Uani 1 1 d . . . 
O6 O 0.0614(7) 0.4082(3) 0.0192(8) 0.0263(13) Uani 1 1 d . . . 
O5 O 0.2605(7) 0.3969(3) 0.3893(8) 0.0261(13) Uani 1 1 d . . . 
O4 O 0.0362(6) 0.4782(2) 0.3167(7) 0.0187(11) Uani 1 1 d . . . 
O8 O 0.3495(7) 0.5151(3) 0.7016(9) 0.0270(13) Uani 1 1 d D . . 
S1 S 0.1643(3) 0.44322(8) 0.2159(3) 0.0185(4) Uani 1 1 d . . . 
H8A H 0.477(3) 0.511(4) 0.751(12) 0.07(3) Uiso 1 1 d D . . 
H8B H 0.324(9) 0.552(3) 0.606(11) 0.05(3) Uiso 1 1 d D . . 
 
loop_ 
 _atom_site_aniso_label 
 _atom_site_aniso_U_11 
 _atom_site_aniso_U_22 
 _atom_site_aniso_U_33 
 _atom_site_aniso_U_23 
 _atom_site_aniso_U_13 
 _atom_site_aniso_U_12 
Tb1 0.0183(2) 0.01133(18) 0.0199(2) 0.00182(17) 0.00521(13) 0.00144(19) 
C6 0.031(5) 0.021(4) 0.017(4) 0.001(3) 0.010(4) -0.006(4) 
C1 0.023(4) 0.020(4) 0.016(4) -0.004(3) 0.005(3) -0.006(3) 
C2 0.020(4) 0.016(4) 0.024(4) 0.003(3) 0.004(3) 0.003(3) 
C3 0.023(4) 0.020(4) 0.018(4) -0.002(3) 0.002(3) 0.001(3) 
C5 0.016(4) 0.016(4) 0.027(4) -0.002(3) 0.004(3) 0.000(3) 
C4 0.030(5) 0.015(4) 0.025(4) -0.003(3) 0.006(4) -0.001(4) 
N1 0.016(3) 0.016(3) 0.016(3) -0.001(2) 0.000(3) -0.003(3) 
O1 0.027(3) 0.012(3) 0.036(3) 0.004(2) 0.000(3) 0.000(2) 
O2 0.033(4) 0.013(3) 0.040(3) -0.006(2) 0.002(3) -0.006(2) 
O3 0.030(4) 0.018(3) 0.040(3) 0.000(2) 0.003(3) -0.007(2) 
O7 0.027(4) 0.030(4) 0.050(4) 0.016(3) 0.018(3) 0.001(3) 
O6 0.030(3) 0.026(3) 0.022(3) -0.007(2) 0.006(2) 0.000(2) 
O5 0.038(3) 0.021(3) 0.019(3) 0.006(2) 0.007(2) 0.013(3) 
O4 0.013(3) 0.018(3) 0.027(3) 0.000(2) 0.008(2) 0.000(2) 
O8 0.018(3) 0.020(3) 0.037(3) 0.008(3) -0.001(3) 0.000(2) 
S1 0.0215(10) 0.0156(10) 0.0199(10) 0.0021(7) 0.0082(8) 0.0029(8) 
 
_geom_special_details 
; 
 All esds (except the esd in the dihedral angle between two l.s. planes) 
 are estimated using the full covariance matrix.  The cell esds are taken 
 into account individually in the estimation of esds in distances, angles 
 and torsion angles; correlations between esds in cell parameters are only 
 used when they are defined by crystal symmetry.  An approximate (isotropic) 
 treatment of cell esds is used for estimating esds involving l.s. planes. 
; 
 
loop_ 
 _geom_bond_atom_site_label_1 
 _geom_bond_atom_site_label_2 
 _geom_bond_distance 
 _geom_bond_site_symmetry_2 
 _geom_bond_publ_flag 
Tb1 O3 2.249(5) 4_666 ? 
Tb1 O8 2.348(5) . ? 
Tb1 O4 2.360(5) 3_566 ? 
Tb1 O6 2.363(5) 1_556 ? 
Tb1 O2 2.448(5) . ? 
Tb1 O5 2.448(5) . ? 
Tb1 O1 2.457(5) . ? 
Tb1 O4 2.547(5) . ? 
Tb1 C6 2.804(8) . ? 
Tb1 S1 3.1224(18) . ? 
Tb1 S1 3.2809(18) 1_556 ? 
C6 O2 1.238(9) . ? 
C6 O1 1.270(9) . ? 
C6 C1 1.503(10) . ? 
C1 C2 1.381(10) . ? 
C1 C5 1.397(10) . ? 
C2 C3 1.371(10) . ? 
C3 N1 1.354(9) . ? 
C5 C4 1.382(10) . ? 
C4 N1 1.351(9) . ? 
N1 O3 1.320(7) . ? 
O3 Tb1 2.249(5) 4_465 ? 
O7 S1 1.446(5) . ? 
O6 S1 1.466(5) . ? 
O6 Tb1 2.363(5) 1_554 ? 
O5 S1 1.481(5) . ? 
O4 S1 1.502(5) . ? 
O4 Tb1 2.360(5) 3_566 ? 
S1 Tb1 3.2809(18) 1_554 ? 
 
loop_ 
 _geom_angle_atom_site_label_1 
 _geom_angle_atom_site_label_2 
 _geom_angle_atom_site_label_3 
 _geom_angle 
 _geom_angle_site_symmetry_1 
 _geom_angle_site_symmetry_3 
 _geom_angle_publ_flag 
O3 Tb1 O8 80.22(19) 4_666 . ? 
O3 Tb1 O4 143.14(18) 4_666 3_566 ? 
O8 Tb1 O4 77.81(17) . 3_566 ? 
O3 Tb1 O6 82.96(19) 4_666 1_556 ? 
O8 Tb1 O6 118.13(19) . 1_556 ? 
O4 Tb1 O6 81.81(17) 3_566 1_556 ? 
O3 Tb1 O2 80.78(19) 4_666 . ? 
O8 Tb1 O2 152.1(2) . . ? 
O4 Tb1 O2 128.43(18) 3_566 . ? 
O6 Tb1 O2 79.32(18) 1_556 . ? 
O3 Tb1 O5 82.28(18) 4_666 . ? 
O8 Tb1 O5 79.59(19) . . ? 
O4 Tb1 O5 121.73(16) 3_566 . ? 
O6 Tb1 O5 154.45(17) 1_556 . ? 
O2 Tb1 O5 77.81(19) . . ? 
O3 Tb1 O1 132.58(18) 4_666 . ? 
O8 Tb1 O1 146.46(17) . . ? 
O4 Tb1 O1 76.40(16) 3_566 . ? 
O6 Tb1 O1 78.82(17) 1_556 . ? 
O2 Tb1 O1 53.05(18) . . ? 
O5 Tb1 O1 96.21(18) . . ? 
O3 Tb1 O4 134.69(18) 4_666 . ? 
O8 Tb1 O4 75.98(17) . . ? 
O4 Tb1 O4 66.66(18) 3_566 . ? 
O6 Tb1 O4 142.35(16) 1_556 . ? 
O2 Tb1 O4 103.99(16) . . ? 
O5 Tb1 O4 55.96(16) . . ? 
O1 Tb1 O4 74.32(16) . . ? 
O3 Tb1 C6 106.3(2) 4_666 . ? 
O8 Tb1 C6 164.2(2) . . ? 
O4 Tb1 C6 102.8(2) 3_566 . ? 
O6 Tb1 C6 77.33(19) 1_556 . ? 
O2 Tb1 C6 26.1(2) . . ? 
O5 Tb1 C6 87.0(2) . . ? 
O1 Tb1 C6 26.9(2) . . ? 
O4 Tb1 C6 89.67(18) . . ? 
O3 Tb1 S1 107.69(15) 4_666 . ? 
O8 Tb1 S1 74.16(14) . . ? 
O4 Tb1 S1 94.30(12) 3_566 . ? 
O6 Tb1 S1 165.56(13) 1_556 . ? 
O2 Tb1 S1 92.54(13) . . ? 
O5 Tb1 S1 27.60(12) . . ? 
O1 Tb1 S1 86.76(12) . . ? 
O4 Tb1 S1 28.49(11) . . ? 
C6 Tb1 S1 90.09(14) . . ? 
O3 Tb1 S1 73.30(14) 4_666 1_556 ? 
O8 Tb1 S1 94.82(14) . 1_556 ? 
O4 Tb1 S1 79.44(11) 3_566 1_556 ? 
O6 Tb1 S1 23.68(13) 1_556 1_556 ? 
O2 Tb1 S1 99.03(13) . 1_556 ? 
O5 Tb1 S1 155.55(12) . 1_556 ? 
O1 Tb1 S1 101.11(12) . 1_556 ? 
O4 Tb1 S1 145.99(11) . 1_556 ? 
C6 Tb1 S1 100.81(14) . 1_556 ? 
S1 Tb1 S1 168.37(6) . 1_556 ? 
O2 C6 O1 121.7(7) . . ? 
O2 C6 C1 120.0(7) . . ? 
O1 C6 C1 118.2(7) . . ? 
O2 C6 Tb1 60.7(4) . . ? 
O1 C6 Tb1 61.1(4) . . ? 
C1 C6 Tb1 175.5(5) . . ? 
C2 C1 C5 117.9(7) . . ? 
C2 C1 C6 123.8(7) . . ? 
C5 C1 C6 118.4(7) . . ? 
C3 C2 C1 121.5(7) . . ? 
N1 C3 C2 118.7(7) . . ? 
C4 C5 C1 120.4(7) . . ? 
N1 C4 C5 118.9(7) . . ? 
O3 N1 C4 116.8(6) . . ? 
O3 N1 C3 120.5(6) . . ? 
C4 N1 C3 122.6(6) . . ? 
C6 O1 Tb1 92.0(5) . . ? 
C6 O2 Tb1 93.2(5) . . ? 
N1 O3 Tb1 150.2(4) . 4_465 ? 
S1 O6 Tb1 116.0(3) . 1_554 ? 
S1 O5 Tb1 102.4(3) . . ? 
S1 O4 Tb1 145.8(3) . 3_566 ? 
S1 O4 Tb1 97.6(2) . . ? 
Tb1 O4 Tb1 113.34(18) 3_566 . ? 
O7 S1 O6 107.8(3) . . ? 
O7 S1 O5 113.2(3) . . ? 
O6 S1 O5 111.5(3) . . ? 
O7 S1 O4 111.4(3) . . ? 
O6 S1 O4 109.3(3) . . ? 
O5 S1 O4 103.6(3) . . ? 
O7 S1 Tb1 123.0(3) . . ? 
O6 S1 Tb1 129.1(2) . . ? 
O5 S1 Tb1 50.0(2) . . ? 
O4 S1 Tb1 53.95(19) . . ? 
O7 S1 Tb1 67.8(2) . 1_554 ? 
O6 S1 Tb1 40.4(2) . 1_554 ? 
O5 S1 Tb1 124.0(2) . 1_554 ? 
O4 S1 Tb1 129.1(2) . 1_554 ? 
Tb1 S1 Tb1 168.37(6) . 1_554 ? 
 
loop_ 
 _geom_hbond_atom_site_label_D 
 _geom_hbond_atom_site_label_H 
 _geom_hbond_atom_site_label_A 
 _geom_hbond_distance_DH 
 _geom_hbond_distance_HA 
 _geom_hbond_distance_DA 
 _geom_hbond_angle_DHA 
 _geom_hbond_site_symmetry_A 
O8 H8A O7  0.95(2) 1.79(2) 2.732(7) 175(8) 3_666 
 
_diffrn_measured_fraction_theta_max    0.998 
_diffrn_reflns_theta_full              27.50 
_diffrn_measured_fraction_theta_full   0.998 
_refine_diff_density_max    1.136 
_refine_diff_density_min   -2.480 
_refine_diff_density_rms    0.291 

#===END


## Crystallographic Data of Complex 9

data_9 
 
_audit_creation_method            SHELXL-97 
_chemical_name_systematic 
; 
 ? 
; 
_chemical_name_common             ? 
_chemical_melting_point           ? 
_chemical_formula_moiety          ? 
_chemical_formula_sum 
 'C6 H6 Dy N O8 S' 
_chemical_formula_weight          414.68 
 
loop_ 
 _atom_type_symbol 
 _atom_type_description 
 _atom_type_scat_dispersion_real 
 _atom_type_scat_dispersion_imag 
 _atom_type_scat_source 
 'C'  'C'   0.0033   0.0016 
 'International Tables Vol C Tables 4.2.6.8 and 6.1.1.4' 
 'H'  'H'   0.0000   0.0000 
 'International Tables Vol C Tables 4.2.6.8 and 6.1.1.4' 
 'N'  'N'   0.0061   0.0033 
 'International Tables Vol C Tables 4.2.6.8 and 6.1.1.4' 
 'O'  'O'   0.0106   0.0060 
 'International Tables Vol C Tables 4.2.6.8 and 6.1.1.4' 
 'Dy'  'Dy'  -0.1892   4.4098 
 'International Tables Vol C Tables 4.2.6.8 and 6.1.1.4' 
 'S'  'S'   0.1246   0.1234 
 'International Tables Vol C Tables 4.2.6.8 and 6.1.1.4' 
 
_symmetry_cell_setting            'monoclinic' 
_symmetry_space_group_name_H-M    'P21/c'  
 
loop_ 
 _symmetry_equiv_pos_as_xyz 
 'x, y, z' 
 '-x, y+1/2, -z+1/2' 
 '-x, -y, -z' 
 'x, -y-1/2, z-1/2' 
 
_cell_length_a                    9.3243(2) 
_cell_length_b                    14.7539(4) 
_cell_length_c                    7.6322(4) 
_cell_angle_alpha                 90.00 
_cell_angle_beta                  100.4356(13) 
_cell_angle_gamma                 90.00 
_cell_volume                      1032.59(6) 
_cell_formula_units_Z             4 
_cell_measurement_temperature     293(2) 
_cell_measurement_reflns_used     17224
_cell_measurement_theta_min        3.395
_cell_measurement_theta_max        27.485
 
_exptl_crystal_description        'block' 
_exptl_crystal_colour             'colorless'
_exptl_crystal_size_max           0.12 
_exptl_crystal_size_mid           0.10 
_exptl_crystal_size_min           0.08 
_exptl_crystal_density_meas       ? 
_exptl_crystal_density_diffrn     2.667 
_exptl_crystal_density_method     'not measured' 
_exptl_crystal_F_000              780 
_exptl_absorpt_coefficient_mu     7.470 
_exptl_absorpt_correction_type    empirical 
_exptl_absorpt_correction_T_min   0.443 
_exptl_absorpt_correction_T_max   0.555 
_exptl_absorpt_process_details    '(Blessing, 1995, 1997)' 
 
_exptl_special_details 
; 
 ? 
; 
 
_diffrn_ambient_temperature       293(2) 
_diffrn_radiation_wavelength      0.71073 
_diffrn_radiation_type            MoK\a 
_diffrn_radiation_source          'fine-focus sealed tube' 
_diffrn_radiation_monochromator   graphite 
_diffrn_measurement_device_type   'NONIUS KappaCCD Diffractometer' 
_diffrn_measurement_method        'CCD' 
_diffrn_detector_area_resol_mean  0.76 
_diffrn_standards_number          ? 
_diffrn_standards_interval_count  ? 
_diffrn_standards_interval_time   ? 
_diffrn_standards_decay_%         none 
_diffrn_reflns_number             19944 
_diffrn_reflns_av_R_equivalents   0.0953 
_diffrn_reflns_av_sigmaI/netI     0.0642 
_diffrn_reflns_limit_h_min        -12 
_diffrn_reflns_limit_h_max        12 
_diffrn_reflns_limit_k_min        -19 
_diffrn_reflns_limit_k_max        18 
_diffrn_reflns_limit_l_min        -9 
_diffrn_reflns_limit_l_max        9 
_diffrn_reflns_theta_min          3.87 
_diffrn_reflns_theta_max          27.50 
_reflns_number_total              2358 
_reflns_number_gt                 1686 
_reflns_threshold_expression      >2sigma(I) 
 
_computing_data_collection        'KappaCCD (Nonius B. V., 1998)' 
_computing_cell_refinement        'HKL Scalepack (Otwinowski & Minor, 1997)' 
_computing_data_reduction
'HKL Denzo (Otwinowski & Minor, 1997) & maXus (Mackay et al., 1998)'
_computing_structure_solution     'SHELXS-97 (Sheldrick, 1997)' 
_computing_structure_refinement   'SHELXL-97 (Sheldrick, 1997)' 
_computing_molecular_graphics     'Bruker SHELXTL V5.1 (Sheldrick, 1998)' 
_computing_publication_material   'SHELXL-97 (Sheldrick, 1997)' 

_publ_section_references
;
collect:
"Collect" data collection software, Nonius B.V., Delft, The Netherlands, 1998.

HKL Scalepack & HKL Denzo:
Z. Otwinowski and W. Minor, " Processing of X-ray Diffraction Data Collected
in Oscillation Mode ", Methods in Enzymology, Volume 276: Macromolecular
Crystallography, part A, p.307-326, 1997,C.W. Carter, Jr. & R.M. Sweet,
Eds., Academic Press, London.

absorption correction:
R.H. Blessing (1995) Acta Cryst. A51, 33-37.
R.H. Blessing (1997) J.Appl. Cryst. 30, 421-426.

maXus: 
S.Mackay, C.J.Gilmore, C.Edwards, M. Tremayne, N. Stuart, K.Shankland
"maXus: a computer program for the solution and refinement of crystal
structures from diffraction data", University of Glasgow, Scotland, UK,
Nonius BV, Delft, The Netherlands and MacScience Co. Ltd., Yokohama,
Japan (1998).

Sheldrick, G. M. (1998). SHELXTL Version 5.1. Bruker Analytical X-ray
Instruments Inc., Madison, Wisconsin, USA.

Sheldrick, G. M. (1997). SHELX-97. PC Version. University of Goettingen,
Germany.
;
 
_refine_special_details 
; 
 Refinement of F^2^ against ALL reflections.  The weighted R-factor wR and 
 goodness of fit S are based on F^2^, conventional R-factors R are based 
 on F, with F set to zero for negative F^2^. The threshold expression of 
 F^2^ > 2sigma(F^2^) is used only for calculating R-factors(gt) etc. and is 
 not relevant to the choice of reflections for refinement.  R-factors based 
 on F^2^ are statistically about twice as large as those based on F, and R- 
 factors based on ALL data will be even larger. 
; 
 
_refine_ls_structure_factor_coef  Fsqd  
_refine_ls_matrix_type            full 
_refine_ls_weighting_scheme       calc  
_refine_ls_weighting_details 
 'calc w=1/[\s^2^(Fo^2^)+(0.0206P)^2^+0.0000P] where P=(Fo^2^+2Fc^2^)/3' 
_atom_sites_solution_primary      direct 
_atom_sites_solution_secondary    difmap 
_atom_sites_solution_hydrogens    geom 
_refine_ls_hydrogen_treatment     mixed 
_refine_ls_extinction_method      SHELXL 
_refine_ls_extinction_coef        0.0026(2) 
_refine_ls_extinction_expression 
 'Fc^*^=kFc[1+0.001xFc^2^\l^3^/sin(2\q)]^-1/4^' 
_refine_ls_number_reflns          2358 
_refine_ls_number_parameters      163 
_refine_ls_number_restraints      0 
_refine_ls_R_factor_all           0.0545 
_refine_ls_R_factor_gt            0.0284 
_refine_ls_wR_factor_ref          0.0518 
_refine_ls_wR_factor_gt           0.0482 
_refine_ls_goodness_of_fit_ref    0.929 
_refine_ls_restrained_S_all       0.929 
_refine_ls_shift/su_max           0.000 
_refine_ls_shift/su_mean          0.000 
 
loop_ 
 _atom_site_label 
 _atom_site_type_symbol 
 _atom_site_fract_x 
 _atom_site_fract_y 
 _atom_site_fract_z 
 _atom_site_U_iso_or_equiv 
 _atom_site_adp_type 
 _atom_site_occupancy 
 _atom_site_symmetry_multiplicity 
 _atom_site_calc_flag 
 _atom_site_refinement_flags 
 _atom_site_disorder_assembly 
 _atom_site_disorder_group 
Dy1 Dy 0.27601(2) 0.042361(13) 0.13491(3) 0.02120(10) Uani 1 1 d . . . 
C4 C -0.0322(6) 0.3950(3) 0.0949(6) 0.0286(12) Uani 1 1 d . . . 
H1A H 0.0396 0.4379 0.1336 0.034 Uiso 1 1 calc R . . 
C5 C 0.0066(6) 0.3068(3) 0.0716(6) 0.0284(12) Uani 1 1 d . . . 
H2A H 0.1043 0.2900 0.0959 0.034 Uiso 1 1 calc R . . 
C1 C -0.0990(5) 0.2432(3) 0.0123(6) 0.0221(11) Uani 1 1 d . . . 
C2 C -0.2439(6) 0.2716(3) -0.0283(7) 0.0337(13) Uani 1 1 d . . . 
H4A H -0.3171 0.2304 -0.0721 0.040 Uiso 1 1 calc R . . 
C3 C -0.2777(6) 0.3599(3) -0.0037(7) 0.0331(13) Uani 1 1 d . . . 
H5A H -0.3741 0.3789 -0.0327 0.040 Uiso 1 1 calc R . . 
C6 C -0.0588(6) 0.1441(3) 0.0002(6) 0.0243(11) Uani 1 1 d . . . 
N1 N -0.1730(4) 0.4198(2) 0.0623(5) 0.0257(9) Uani 1 1 d . . . 
O1 O 0.0729(4) 0.1243(2) 0.0490(5) 0.0353(9) Uani 1 1 d . . . 
O2 O -0.1585(4) 0.0903(2) -0.0586(5) 0.0320(8) Uani 1 1 d . . . 
O3 O -0.2094(4) 0.5040(2) 0.0997(4) 0.0299(8) Uani 1 1 d . . . 
O4 O 0.4394(4) 0.1308(2) -0.0001(4) 0.0304(8) Uani 1 1 d . . . 
O5 O 0.2807(4) 0.0302(2) -0.1752(4) 0.0288(8) Uani 1 1 d . . . 
O6 O 0.5254(4) 0.0454(2) -0.2330(5) 0.0346(8) Uani 1 1 d . . . 
O7 O 0.3590(4) 0.1676(2) -0.3108(4) 0.0302(8) Uani 1 1 d . . . 
O8 O 0.3533(4) 0.1601(2) 0.3320(5) 0.0334(9) Uani 1 1 d . . . 
S1 S 0.40131(13) 0.09417(7) -0.18347(16) 0.0232(3) Uani 1 1 d . . . 
H8A H 0.353(7) 0.224(5) 0.294(8) 0.09(2) Uiso 1 1 d . . . 
H8B H 0.332(8) 0.162(4) 0.423(9) 0.06(2) Uiso 1 1 d . . . 
 
loop_ 
 _atom_site_aniso_label 
 _atom_site_aniso_U_11 
 _atom_site_aniso_U_22 
 _atom_site_aniso_U_33 
 _atom_site_aniso_U_23 
 _atom_site_aniso_U_13 
 _atom_site_aniso_U_12 
Dy1 0.02027(14) 0.01795(13) 0.02541(14) 0.00006(11) 0.00424(9) -0.00010(11) 
C4 0.024(3) 0.025(3) 0.036(3) -0.002(2) 0.004(2) -0.002(2) 
C5 0.021(3) 0.026(3) 0.037(3) -0.004(2) 0.004(2) -0.005(2) 
C1 0.022(3) 0.017(2) 0.027(3) -0.001(2) 0.003(2) 0.002(2) 
C2 0.020(3) 0.026(3) 0.051(4) -0.011(2) -0.002(3) -0.002(2) 
C3 0.017(3) 0.027(3) 0.055(4) -0.006(2) 0.004(3) 0.002(2) 
C6 0.035(3) 0.018(3) 0.022(3) -0.001(2) 0.010(2) -0.001(2) 
N1 0.028(3) 0.0183(19) 0.031(2) 0.0012(17) 0.008(2) 0.0014(18) 
O1 0.025(2) 0.0291(19) 0.050(2) -0.0035(17) 0.0022(18) 0.0090(16) 
O2 0.037(2) 0.0194(17) 0.041(2) -0.0043(15) 0.0098(18) -0.0026(17) 
O3 0.036(2) 0.0159(16) 0.040(2) -0.0032(15) 0.0116(18) 0.0076(16) 
O4 0.036(2) 0.0340(19) 0.0209(18) -0.0017(15) 0.0046(16) -0.0128(16) 
O5 0.026(2) 0.0316(19) 0.0295(19) -0.0020(14) 0.0063(15) -0.0056(15) 
O6 0.032(2) 0.036(2) 0.039(2) 0.0080(17) 0.0149(17) 0.0144(17) 
O7 0.040(2) 0.0237(18) 0.027(2) 0.0064(14) 0.0049(17) 0.0090(16) 
O8 0.050(3) 0.026(2) 0.026(2) -0.0012(16) 0.010(2) -0.0098(17) 
S1 0.0217(7) 0.0227(6) 0.0252(7) 0.0043(5) 0.0039(5) 0.0031(5) 
 
_geom_special_details 
; 
 All esds (except the esd in the dihedral angle between two l.s. planes) 
 are estimated using the full covariance matrix.  The cell esds are taken 
 into account individually in the estimation of esds in distances, angles 
 and torsion angles; correlations between esds in cell parameters are only 
 used when they are defined by crystal symmetry.  An approximate (isotropic) 
 treatment of cell esds is used for estimating esds involving l.s. planes. 
; 
 
loop_ 
 _geom_bond_atom_site_label_1 
 _geom_bond_atom_site_label_2 
 _geom_bond_distance 
 _geom_bond_site_symmetry_2 
 _geom_bond_publ_flag 
Dy1 O1 2.242(3) . ? 
Dy1 O2 2.267(3) 3 ? 
Dy1 O6 2.272(3) 3_655 ? 
Dy1 O3 2.294(3) 2_545 ? 
Dy1 O8 2.325(4) . ? 
Dy1 O4 2.378(3) . ? 
Dy1 O5 2.382(3) . ? 
Dy1 S1 2.9804(12) . ? 
C4 N1 1.343(6) . ? 
C4 C5 1.370(6) . ? 
C5 C1 1.376(6) . ? 
C1 C2 1.394(6) . ? 
C1 C6 1.517(6) . ? 
C2 C3 1.361(6) . ? 
C3 N1 1.345(6) . ? 
C6 O2 1.243(6) . ? 
C6 O1 1.252(6) . ? 
N1 O3 1.332(5) . ? 
O2 Dy1 2.267(3) 3 ? 
O3 Dy1 2.294(3) 2 ? 
O4 S1 1.483(3) . ? 
O5 S1 1.479(3) . ? 
O6 S1 1.469(3) . ? 
O6 Dy1 2.272(3) 3_655 ? 
O7 S1 1.461(3) . ? 
 
loop_ 
 _geom_angle_atom_site_label_1 
 _geom_angle_atom_site_label_2 
 _geom_angle_atom_site_label_3 
 _geom_angle 
 _geom_angle_site_symmetry_1 
 _geom_angle_site_symmetry_3 
 _geom_angle_publ_flag 
O1 Dy1 O2 92.71(12) . 3 ? 
O1 Dy1 O6 176.57(12) . 3_655 ? 
O2 Dy1 O6 85.42(12) 3 3_655 ? 
O1 Dy1 O3 92.40(12) . 2_545 ? 
O2 Dy1 O3 79.53(12) 3 2_545 ? 
O6 Dy1 O3 84.44(12) 3_655 2_545 ? 
O1 Dy1 O8 86.14(13) . . ? 
O2 Dy1 O8 152.86(14) 3 . ? 
O6 Dy1 O8 94.22(13) 3_655 . ? 
O3 Dy1 O8 73.44(13) 2_545 . ? 
O1 Dy1 O4 98.67(12) . . ? 
O2 Dy1 O4 132.87(11) 3 . ? 
O6 Dy1 O4 84.69(12) 3_655 . ? 
O3 Dy1 O4 144.58(11) 2_545 . ? 
O8 Dy1 O4 73.88(12) . . ? 
O1 Dy1 O5 85.23(12) . . ? 
O2 Dy1 O5 76.97(11) 3 . ? 
O6 Dy1 O5 97.12(12) 3_655 . ? 
O3 Dy1 O5 156.23(11) 2_545 . ? 
O8 Dy1 O5 129.79(13) . . ? 
O4 Dy1 O5 58.84(10) . . ? 
O1 Dy1 S1 93.35(9) . . ? 
O2 Dy1 S1 104.75(9) 3 . ? 
O6 Dy1 S1 89.90(9) 3_655 . ? 
O3 Dy1 S1 172.65(9) 2_545 . ? 
O8 Dy1 S1 102.39(11) . . ? 
O4 Dy1 S1 29.48(7) . . ? 
O5 Dy1 S1 29.40(8) . . ? 
N1 C4 C5 120.5(4) . . ? 
C4 C5 C1 120.0(5) . . ? 
C5 C1 C2 118.4(4) . . ? 
C5 C1 C6 120.5(4) . . ? 
C2 C1 C6 121.1(4) . . ? 
C3 C2 C1 119.7(5) . . ? 
N1 C3 C2 120.7(5) . . ? 
O2 C6 O1 126.1(4) . . ? 
O2 C6 C1 117.4(4) . . ? 
O1 C6 C1 116.5(4) . . ? 
O3 N1 C4 119.6(4) . . ? 
O3 N1 C3 119.8(4) . . ? 
C4 N1 C3 120.6(4) . . ? 
C6 O1 Dy1 160.7(3) . . ? 
C6 O2 Dy1 159.9(3) . 3 ? 
N1 O3 Dy1 122.7(3) . 2 ? 
S1 O4 Dy1 98.38(15) . . ? 
S1 O5 Dy1 98.36(16) . . ? 
S1 O6 Dy1 145.8(2) . 3_655 ? 
O7 S1 O6 108.81(19) . . ? 
O7 S1 O5 112.7(2) . . ? 
O6 S1 O5 109.79(19) . . ? 
O7 S1 O4 110.32(18) . . ? 
O6 S1 O4 110.9(2) . . ? 
O5 S1 O4 104.28(19) . . ? 
O7 S1 Dy1 129.35(14) . . ? 
O6 S1 Dy1 121.84(14) . . ? 
O5 S1 Dy1 52.25(13) . . ? 
O4 S1 Dy1 52.13(12) . . ? 
 
loop_ 
 _geom_hbond_atom_site_label_D 
 _geom_hbond_atom_site_label_H 
 _geom_hbond_atom_site_label_A 
 _geom_hbond_distance_DH 
 _geom_hbond_distance_HA 
 _geom_hbond_distance_DA 
 _geom_hbond_angle_DHA 
 _geom_hbond_site_symmetry_A 
O8 H8A O7  0.98(7) 1.80(7) 2.771(5) 170(6) 4_566 
O8 H8B O7  0.75(6) 2.01(6) 2.719(5) 158(7) 1_556 
 
_diffrn_measured_fraction_theta_max    0.997 
_diffrn_reflns_theta_full              27.50 
_diffrn_measured_fraction_theta_full   0.997 
_refine_diff_density_max    1.675 
_refine_diff_density_min   -1.040 
_refine_diff_density_rms    0.199 

#===END


## Crystallographic Data of Complex 10

data_10 
 
_audit_creation_method            SHELXL-97 
_chemical_name_systematic 
; 
 ? 
; 
_chemical_name_common             ? 
_chemical_melting_point           ? 
_chemical_formula_moiety          ? 
_chemical_formula_sum 
 'C6 H6 Ho N O8 S' 
_chemical_formula_weight          417.11 
 
loop_ 
 _atom_type_symbol 
 _atom_type_description 
 _atom_type_scat_dispersion_real 
 _atom_type_scat_dispersion_imag 
 _atom_type_scat_source 
 'C'  'C'   0.0033   0.0016 
 'International Tables Vol C Tables 4.2.6.8 and 6.1.1.4' 
 'H'  'H'   0.0000   0.0000 
 'International Tables Vol C Tables 4.2.6.8 and 6.1.1.4' 
 'N'  'N'   0.0061   0.0033 
 'International Tables Vol C Tables 4.2.6.8 and 6.1.1.4' 
 'O'  'O'   0.0106   0.0060 
 'International Tables Vol C Tables 4.2.6.8 and 6.1.1.4' 
 'Ho'  'Ho'  -0.2175   4.6783 
 'International Tables Vol C Tables 4.2.6.8 and 6.1.1.4' 
 'S'  'S'   0.1246   0.1234 
 'International Tables Vol C Tables 4.2.6.8 and 6.1.1.4' 
 
_symmetry_cell_setting            'monoclinic' 
_symmetry_space_group_name_H-M    'P21/c' 
 
loop_ 
 _symmetry_equiv_pos_as_xyz 
 'x, y, z' 
 '-x, y+1/2, -z+1/2' 
 '-x, -y, -z' 
 'x, -y-1/2, z-1/2' 
 
_cell_length_a                    9.3076(2) 
_cell_length_b                    14.7214(3) 
_cell_length_c                    7.6176(2) 
_cell_angle_alpha                 90.00 
_cell_angle_beta                  100.4505(9) 
_cell_angle_gamma                 90.00 
_cell_volume                      1026.46(4) 
_cell_formula_units_Z             4 
_cell_measurement_temperature     293(2) 
_cell_measurement_reflns_used     10830
_cell_measurement_theta_min       3.88 
_cell_measurement_theta_max       27.48 
 
_exptl_crystal_description        'block' 
_exptl_crystal_colour             'pale yellow' 
_exptl_crystal_size_max           0.11 
_exptl_crystal_size_mid           0.07 
_exptl_crystal_size_min           0.05 
_exptl_crystal_density_meas       ? 
_exptl_crystal_density_diffrn     2.699 
_exptl_crystal_density_method     'not measured' 
_exptl_crystal_F_000              784 
_exptl_absorpt_coefficient_mu     7.944 
_exptl_absorpt_correction_type    empirical 
_exptl_absorpt_correction_T_min   0.523 
_exptl_absorpt_correction_T_max   0.691 
_exptl_absorpt_process_details    '(Blessing, 1995, 1997)' 
 
_exptl_special_details 
; 
 ? 
; 
 
_diffrn_ambient_temperature       293(2) 
_diffrn_radiation_wavelength      0.71073 
_diffrn_radiation_type            MoK\a 
_diffrn_radiation_source          'fine-focus sealed tube' 
_diffrn_radiation_monochromator   graphite 
_diffrn_measurement_device_type   'NONIUS KappaCCD Diffractometer' 
_diffrn_measurement_method        'CCD' 
_diffrn_detector_area_resol_mean  0.76 
_diffrn_standards_number          ? 
_diffrn_standards_interval_count  ? 
_diffrn_standards_interval_time   ? 
_diffrn_standards_decay_%         none 
_diffrn_reflns_number             18788 
_diffrn_reflns_av_R_equivalents   0.0707 
_diffrn_reflns_av_sigmaI/netI     0.0449 
_diffrn_reflns_limit_h_min        -12 
_diffrn_reflns_limit_h_max        12 
_diffrn_reflns_limit_k_min        -19 
_diffrn_reflns_limit_k_max        19 
_diffrn_reflns_limit_l_min        -9 
_diffrn_reflns_limit_l_max        9 
_diffrn_reflns_theta_min          3.88 
_diffrn_reflns_theta_max          27.48 
_reflns_number_total              2344 
_reflns_number_gt                 1878 
_reflns_threshold_expression      >2sigma(I) 
 
_computing_data_collection        'KappaCCD (Nonius B. V., 1998)' 
_computing_cell_refinement        'HKL Scalepack (Otwinowski & Minor, 1997)' 
_computing_data_reduction
'HKL Denzo (Otwinowski & Minor, 1997) & maXus (Mackay et al., 1998)'
_computing_structure_solution     'SHELXS-97 (Sheldrick, 1997)' 
_computing_structure_refinement   'SHELXL-97 (Sheldrick, 1997)' 
_computing_molecular_graphics     'Bruker SHELXTL V5.1 (Sheldrick, 1998)' 
_computing_publication_material   'SHELXL-97 (Sheldrick, 1997)' 

_publ_section_references
;
collect:
"Collect" data collection software, Nonius B.V., Delft, The Netherlands, 1998.

HKL Scalepack & HKL Denzo:
Z. Otwinowski and W. Minor, " Processing of X-ray Diffraction Data Collected
in Oscillation Mode ", Methods in Enzymology, Volume 276: Macromolecular
Crystallography, part A, p.307-326, 1997,C.W. Carter, Jr. & R.M. Sweet,
Eds., Academic Press, London.

absorption correction:
R.H. Blessing (1995) Acta Cryst. A51, 33-37.
R.H. Blessing (1997) J.Appl. Cryst. 30, 421-426.

maXus: 
S.Mackay, C.J.Gilmore, C.Edwards, M. Tremayne, N. Stuart, K.Shankland
"maXus: a computer program for the solution and refinement of crystal
structures from diffraction data", University of Glasgow, Scotland, UK,
Nonius BV, Delft, The Netherlands and MacScience Co. Ltd., Yokohama,
Japan (1998).

Sheldrick, G. M. (1998). SHELXTL Version 5.1. Bruker Analytical X-ray
Instruments Inc., Madison, Wisconsin, USA.

Sheldrick, G. M. (1997). SHELX-97. PC Version. University of Goettingen,
Germany.
;
 
_refine_special_details 
; 
 Refinement of F^2^ against ALL reflections.  The weighted R-factor wR and 
 goodness of fit S are based on F^2^, conventional R-factors R are based 
 on F, with F set to zero for negative F^2^. The threshold expression of 
 F^2^ > 2sigma(F^2^) is used only for calculating R-factors(gt) etc. and is 
 not relevant to the choice of reflections for refinement.  R-factors based 
 on F^2^ are statistically about twice as large as those based on F, and R- 
 factors based on ALL data will be even larger. 
; 
 
_refine_ls_structure_factor_coef  Fsqd  
_refine_ls_matrix_type            full 
_refine_ls_weighting_scheme       calc  
_refine_ls_weighting_details 
 'calc w=1/[\s^2^(Fo^2^)+(0.0264P)^2^+0.0000P] where P=(Fo^2^+2Fc^2^)/3' 
_atom_sites_solution_primary      direct 
_atom_sites_solution_secondary    difmap 
_atom_sites_solution_hydrogens    geom 
_refine_ls_hydrogen_treatment     mixed 
_refine_ls_extinction_method      SHELXL 
_refine_ls_extinction_coef        0.0123(4) 
_refine_ls_extinction_expression 
 'Fc^*^=kFc[1+0.001xFc^2^\l^3^/sin(2\q)]^-1/4^' 
_refine_ls_number_reflns          2344 
_refine_ls_number_parameters      163 
_refine_ls_number_restraints      0 
_refine_ls_R_factor_all           0.0375 
_refine_ls_R_factor_gt            0.0252 
_refine_ls_wR_factor_ref          0.0515 
_refine_ls_wR_factor_gt           0.0499 
_refine_ls_goodness_of_fit_ref    0.956 
_refine_ls_restrained_S_all       0.956 
_refine_ls_shift/su_max           0.001 
_refine_ls_shift/su_mean          0.000 
 
loop_ 
 _atom_site_label 
 _atom_site_type_symbol 
 _atom_site_fract_x 
 _atom_site_fract_y 
 _atom_site_fract_z 
 _atom_site_U_iso_or_equiv 
 _atom_site_adp_type 
 _atom_site_occupancy 
 _atom_site_symmetry_multiplicity 
 _atom_site_calc_flag 
 _atom_site_refinement_flags 
 _atom_site_disorder_assembly 
 _atom_site_disorder_group 
Ho1 Ho 0.27589(2) 0.042285(11) 0.13468(2) 0.01789(9) Uani 1 1 d . . . 
C4 C -0.0320(5) 0.3953(3) 0.0961(6) 0.0256(10) Uani 1 1 d . . . 
H1A H 0.0397 0.4383 0.1360 0.031 Uiso 1 1 calc R . . 
C5 C 0.0069(5) 0.3069(3) 0.0714(6) 0.0246(10) Uani 1 1 d . . . 
H2A H 0.1049 0.2901 0.0933 0.030 Uiso 1 1 calc R . . 
C1 C -0.1000(5) 0.2426(3) 0.0136(5) 0.0214(9) Uani 1 1 d . . . 
C2 C -0.2439(5) 0.2707(3) -0.0277(6) 0.0284(10) Uani 1 1 d . . . 
H4A H -0.3169 0.2291 -0.0718 0.034 Uiso 1 1 calc R . . 
C3 C -0.2795(5) 0.3604(3) -0.0034(6) 0.0307(11) Uani 1 1 d . . . 
H5A H -0.3761 0.3796 -0.0326 0.037 Uiso 1 1 calc R . . 
C6 C -0.0589(5) 0.1443(3) 0.0000(5) 0.0229(9) Uani 1 1 d . . . 
N1 N -0.1735(4) 0.4197(2) 0.0627(4) 0.0219(8) Uani 1 1 d . . . 
O1 O 0.0735(3) 0.1242(2) 0.0486(4) 0.0328(7) Uani 1 1 d . . . 
O2 O -0.1581(3) 0.08982(19) -0.0582(4) 0.0297(7) Uani 1 1 d . . . 
O3 O -0.2097(3) 0.5039(2) 0.1008(4) 0.0258(7) Uani 1 1 d . . . 
O4 O 0.4385(3) 0.1315(2) 0.0007(4) 0.0283(7) Uani 1 1 d . . . 
O5 O 0.2808(3) 0.02957(19) -0.1740(4) 0.0252(7) Uani 1 1 d . . . 
O6 O 0.5269(4) 0.0455(2) -0.2313(4) 0.0329(8) Uani 1 1 d . . . 
O7 O 0.3593(3) 0.1674(2) -0.3103(4) 0.0282(7) Uani 1 1 d . . . 
O8 O 0.3530(4) 0.1590(2) 0.3313(5) 0.0318(8) Uani 1 1 d . . . 
S1 S 0.40156(11) 0.09422(7) -0.18243(13) 0.0204(2) Uani 1 1 d . . . 
H8A H 0.353(6) 0.210(4) 0.282(7) 0.057(19) Uiso 1 1 d . . . 
H8B H 0.330(5) 0.158(3) 0.416(6) 0.024(15) Uiso 1 1 d . . . 
 
loop_ 
 _atom_site_aniso_label 
 _atom_site_aniso_U_11 
 _atom_site_aniso_U_22 
 _atom_site_aniso_U_33 
 _atom_site_aniso_U_23 
 _atom_site_aniso_U_13 
 _atom_site_aniso_U_12 
Ho1 0.01627(13) 0.01600(12) 0.02167(13) 0.00002(8) 0.00418(7) -0.00020(8) 
C4 0.022(2) 0.024(2) 0.031(2) 0.0002(19) 0.0073(19) -0.0040(19) 
C5 0.012(2) 0.024(2) 0.039(3) -0.0045(19) 0.0065(18) 0.0000(17) 
C1 0.023(2) 0.019(2) 0.023(2) -0.0015(17) 0.0061(17) 0.0007(18) 
C2 0.018(2) 0.021(2) 0.044(3) -0.008(2) 0.000(2) -0.0030(18) 
C3 0.015(2) 0.027(2) 0.048(3) -0.005(2) 0.000(2) 0.0033(18) 
C6 0.025(3) 0.025(2) 0.019(2) -0.0012(17) 0.0046(18) 0.0024(18) 
N1 0.027(2) 0.0165(17) 0.0234(18) -0.0026(14) 0.0070(15) 0.0018(15) 
O1 0.0243(18) 0.0273(17) 0.0443(19) -0.0035(15) -0.0003(14) 0.0079(14) 
O2 0.0280(18) 0.0208(16) 0.0395(18) -0.0077(14) 0.0043(14) -0.0044(14) 
O3 0.0319(18) 0.0168(15) 0.0321(17) -0.0024(13) 0.0147(14) 0.0063(13) 
O4 0.0290(18) 0.0342(17) 0.0211(15) -0.0013(13) 0.0033(13) -0.0126(13) 
O5 0.0225(16) 0.0294(17) 0.0242(15) -0.0030(12) 0.0056(13) -0.0070(13) 
O6 0.0260(18) 0.0384(19) 0.0375(18) 0.0112(15) 0.0141(14) 0.0151(14) 
O7 0.039(2) 0.0235(16) 0.0222(15) 0.0050(13) 0.0050(14) 0.0078(14) 
O8 0.047(2) 0.0267(19) 0.0237(19) 0.0004(15) 0.0123(17) -0.0064(15) 
S1 0.0181(5) 0.0216(5) 0.0217(5) 0.0027(4) 0.0038(4) 0.0025(4) 
 
_geom_special_details 
; 
 All esds (except the esd in the dihedral angle between two l.s. planes) 
 are estimated using the full covariance matrix.  The cell esds are taken 
 into account individually in the estimation of esds in distances, angles 
 and torsion angles; correlations between esds in cell parameters are only 
 used when they are defined by crystal symmetry.  An approximate (isotropic) 
 treatment of cell esds is used for estimating esds involving l.s. planes. 
; 
 
loop_ 
 _geom_bond_atom_site_label_1 
 _geom_bond_atom_site_label_2 
 _geom_bond_distance 
 _geom_bond_site_symmetry_2 
 _geom_bond_publ_flag 
Ho1 O1 2.232(3) . ? 
Ho1 O6 2.257(3) 3_655 ? 
Ho1 O2 2.257(3) 3 ? 
Ho1 O3 2.282(3) 2_545 ? 
Ho1 O8 2.307(3) . ? 
Ho1 O5 2.368(3) . ? 
Ho1 O4 2.370(3) . ? 
Ho1 S1 2.9687(10) . ? 
C4 N1 1.345(6) . ? 
C4 C5 1.373(6) . ? 
C5 C1 1.386(6) . ? 
C1 C2 1.382(6) . ? 
C1 C6 1.505(5) . ? 
C2 C3 1.382(6) . ? 
C3 N1 1.345(5) . ? 
C6 O2 1.242(5) . ? 
C6 O1 1.256(5) . ? 
N1 O3 1.330(4) . ? 
O2 Ho1 2.257(3) 3 ? 
O3 Ho1 2.282(3) 2 ? 
O4 S1 1.480(3) . ? 
O5 S1 1.483(3) . ? 
O6 S1 1.473(3) . ? 
O6 Ho1 2.257(3) 3_655 ? 
O7 S1 1.458(3) . ? 
 
loop_ 
 _geom_angle_atom_site_label_1 
 _geom_angle_atom_site_label_2 
 _geom_angle_atom_site_label_3 
 _geom_angle 
 _geom_angle_site_symmetry_1 
 _geom_angle_site_symmetry_3 
 _geom_angle_publ_flag 
O1 Ho1 O6 176.66(11) . 3_655 ? 
O1 Ho1 O2 92.57(11) . 3 ? 
O6 Ho1 O2 85.36(11) 3_655 3 ? 
O1 Ho1 O3 92.55(11) . 2_545 ? 
O6 Ho1 O3 84.49(11) 3_655 2_545 ? 
O2 Ho1 O3 79.53(11) 3 2_545 ? 
O1 Ho1 O8 86.26(12) . . ? 
O6 Ho1 O8 94.37(12) 3_655 . ? 
O2 Ho1 O8 152.76(13) 3 . ? 
O3 Ho1 O8 73.34(12) 2_545 . ? 
O1 Ho1 O5 85.31(11) . . ? 
O6 Ho1 O5 96.76(11) 3_655 . ? 
O2 Ho1 O5 76.78(10) 3 . ? 
O3 Ho1 O5 156.09(10) 2_545 . ? 
O8 Ho1 O5 130.09(12) . . ? 
O1 Ho1 O4 98.33(11) . . ? 
O6 Ho1 O4 85.00(11) 3_655 . ? 
O2 Ho1 O4 133.22(10) 3 . ? 
O3 Ho1 O4 144.39(9) 2_545 . ? 
O8 Ho1 O4 73.67(12) . . ? 
O5 Ho1 O4 59.16(9) . . ? 
O1 Ho1 S1 93.33(9) . . ? 
O6 Ho1 S1 89.75(8) 3_655 . ? 
O2 Ho1 S1 104.86(8) 3 . ? 
O3 Ho1 S1 172.48(8) 2_545 . ? 
O8 Ho1 S1 102.38(10) . . ? 
O5 Ho1 S1 29.64(7) . . ? 
O4 Ho1 S1 29.58(7) . . ? 
N1 C4 C5 120.1(4) . . ? 
C4 C5 C1 119.9(4) . . ? 
C2 C1 C5 118.6(4) . . ? 
C2 C1 C6 121.3(4) . . ? 
C5 C1 C6 120.1(4) . . ? 
C3 C2 C1 120.1(4) . . ? 
N1 C3 C2 119.6(4) . . ? 
O2 C6 O1 125.4(4) . . ? 
O2 C6 C1 117.6(4) . . ? 
O1 C6 C1 117.0(4) . . ? 
O3 N1 C4 119.1(3) . . ? 
O3 N1 C3 119.3(3) . . ? 
C4 N1 C3 121.6(4) . . ? 
C6 O1 Ho1 160.8(3) . . ? 
C6 O2 Ho1 160.6(3) . 3 ? 
N1 O3 Ho1 122.9(2) . 2 ? 
S1 O4 Ho1 98.21(14) . . ? 
S1 O5 Ho1 98.25(14) . . ? 
S1 O6 Ho1 146.2(2) . 3_655 ? 
O7 S1 O6 108.73(18) . . ? 
O7 S1 O4 110.08(17) . . ? 
O6 S1 O4 111.08(19) . . ? 
O7 S1 O5 112.84(18) . . ? 
O6 S1 O5 109.86(18) . . ? 
O4 S1 O5 104.22(17) . . ? 
O7 S1 Ho1 129.46(13) . . ? 
O6 S1 Ho1 121.81(13) . . ? 
O4 S1 Ho1 52.22(11) . . ? 
O5 S1 Ho1 52.12(11) . . ? 
 
loop_ 
 _geom_hbond_atom_site_label_D 
 _geom_hbond_atom_site_label_H 
 _geom_hbond_atom_site_label_A 
 _geom_hbond_distance_DH 
 _geom_hbond_distance_HA 
 _geom_hbond_distance_DA 
 _geom_hbond_angle_DHA 
 _geom_hbond_site_symmetry_A 
O8 H8A O7  0.83(6) 1.95(6) 2.778(5) 175(5) 4_566 
O8 H8B O7  0.72(5) 2.05(5) 2.723(5) 155(5) 1_556 
 
_diffrn_measured_fraction_theta_max    0.997 
_diffrn_reflns_theta_full              27.48 
_diffrn_measured_fraction_theta_full   0.997 
_refine_diff_density_max    0.808 
_refine_diff_density_min   -1.646 
_refine_diff_density_rms    0.180 

#===END


## Crystallographic Data of Complex 11

data_11 
 
_audit_creation_method            SHELXL-97 
_chemical_name_systematic 
; 
 ? 
; 
_chemical_name_common             ? 
_chemical_melting_point           ? 
_chemical_formula_moiety          ? 
_chemical_formula_sum 
 'C6 H6 Er N O8 S' 
_chemical_formula_weight          419.44 
 
loop_ 
 _atom_type_symbol 
 _atom_type_description 
 _atom_type_scat_dispersion_real 
 _atom_type_scat_dispersion_imag 
 _atom_type_scat_source 
 'C'  'C'   0.0033   0.0016 
 'International Tables Vol C Tables 4.2.6.8 and 6.1.1.4' 
 'H'  'H'   0.0000   0.0000 
 'International Tables Vol C Tables 4.2.6.8 and 6.1.1.4' 
 'N'  'N'   0.0061   0.0033 
 'International Tables Vol C Tables 4.2.6.8 and 6.1.1.4' 
 'O'  'O'   0.0106   0.0060 
 'International Tables Vol C Tables 4.2.6.8 and 6.1.1.4' 
 'Er'  'Er'  -0.2586   4.9576 
 'International Tables Vol C Tables 4.2.6.8 and 6.1.1.4' 
 'S'  'S'   0.1246   0.1234 
 'International Tables Vol C Tables 4.2.6.8 and 6.1.1.4' 
 
_symmetry_cell_setting            'monoclinic' 
_symmetry_space_group_name_H-M    'P21/c' 
 
loop_ 
 _symmetry_equiv_pos_as_xyz 
 'x, y, z' 
 '-x, y+1/2, -z+1/2' 
 '-x, -y, -z' 
 'x, -y-1/2, z-1/2' 
 
_cell_length_a                    9.2921(2) 
_cell_length_b                    14.6877(3) 
_cell_length_c                    7.6046(2) 
_cell_angle_alpha                 90.00 
_cell_angle_beta                  100.4473(9) 
_cell_angle_gamma                 90.00 
_cell_volume                      1020.67(4) 
_cell_formula_units_Z             4 
_cell_measurement_temperature     293(2) 
_cell_measurement_reflns_used     13587
_cell_measurement_theta_min        3.89
_cell_measurement_theta_max        27.49
 
_exptl_crystal_description        'flake' 
_exptl_crystal_colour             'light pink'
_exptl_crystal_size_max           0.20 
_exptl_crystal_size_mid           0.14 
_exptl_crystal_size_min           0.05 
_exptl_crystal_density_meas       ? 
_exptl_crystal_density_diffrn     2.730 
_exptl_crystal_density_method     'not measured' 
_exptl_crystal_F_000              788 
_exptl_absorpt_coefficient_mu     8.459 
_exptl_absorpt_correction_type    empirical 
_exptl_absorpt_correction_T_min   0.456 
_exptl_absorpt_correction_T_max   0.672 
_exptl_absorpt_process_details    '(Blessing, 1995, 1997)' 
 
_exptl_special_details 
; 
 ? 
; 
 
_diffrn_ambient_temperature       293(2) 
_diffrn_radiation_wavelength      0.71073 
_diffrn_radiation_type            MoK\a 
_diffrn_radiation_source          'fine-focus sealed tube' 
_diffrn_radiation_monochromator   graphite 
_diffrn_measurement_device_type   'NONIUS KappaCCD Diffractometer' 
_diffrn_measurement_method        'CCD' 
_diffrn_detector_area_resol_mean  0.76 
_diffrn_standards_number          ? 
_diffrn_standards_interval_count  ? 
_diffrn_standards_interval_time   ? 
_diffrn_standards_decay_%         none 
_diffrn_reflns_number             17742 
_diffrn_reflns_av_R_equivalents   0.0688 
_diffrn_reflns_av_sigmaI/netI     0.0367 
_diffrn_reflns_limit_h_min        -12 
_diffrn_reflns_limit_h_max        12 
_diffrn_reflns_limit_k_min        -19 
_diffrn_reflns_limit_k_max        19 
_diffrn_reflns_limit_l_min        -9 
_diffrn_reflns_limit_l_max        9 
_diffrn_reflns_theta_min          3.89 
_diffrn_reflns_theta_max          27.49 
_reflns_number_total              2337 
_reflns_number_gt                 1959 
_reflns_threshold_expression      >2sigma(I) 
 
_computing_data_collection        'KappaCCD (Nonius B. V., 1998)' 
_computing_cell_refinement        'HKL Scalepack (Otwinowski & Minor, 1997)' 
_computing_data_reduction
'HKL Denzo (Otwinowski & Minor, 1997) & maXus (Mackay et al., 1998)'
_computing_structure_solution     'SHELXS-97 (Sheldrick, 1997)' 
_computing_structure_refinement   'SHELXL-97 (Sheldrick, 1997)' 
_computing_molecular_graphics     'Bruker SHELXTL V5.1 (Sheldrick, 1998)' 
_computing_publication_material   'SHELXL-97 (Sheldrick, 1997)' 

_publ_section_references
;
collect:
"Collect" data collection software, Nonius B.V., Delft, The Netherlands, 1998.

HKL Scalepack & HKL Denzo:
Z. Otwinowski and W. Minor, " Processing of X-ray Diffraction Data Collected
in Oscillation Mode ", Methods in Enzymology, Volume 276: Macromolecular
Crystallography, part A, p.307-326, 1997,C.W. Carter, Jr. & R.M. Sweet,
Eds., Academic Press, London.

absorption correction:
R.H. Blessing (1995) Acta Cryst. A51, 33-37.
R.H. Blessing (1997) J.Appl. Cryst. 30, 421-426.

maXus: 
S.Mackay, C.J.Gilmore, C.Edwards, M. Tremayne, N. Stuart, K.Shankland
"maXus: a computer program for the solution and refinement of crystal
structures from diffraction data", University of Glasgow, Scotland, UK,
Nonius BV, Delft, The Netherlands and MacScience Co. Ltd., Yokohama,
Japan (1998).

Sheldrick, G. M. (1998). SHELXTL Version 5.1. Bruker Analytical X-ray
Instruments Inc., Madison, Wisconsin, USA.

Sheldrick, G. M. (1997). SHELX-97. PC Version. University of Goettingen,
Germany.
;
 
_refine_special_details 
; 
 Refinement of F^2^ against ALL reflections.  The weighted R-factor wR and 
 goodness of fit S are based on F^2^, conventional R-factors R are based 
 on F, with F set to zero for negative F^2^. The threshold expression of 
 F^2^ > 2sigma(F^2^) is used only for calculating R-factors(gt) etc. and is 
 not relevant to the choice of reflections for refinement.  R-factors based 
 on F^2^ are statistically about twice as large as those based on F, and R- 
 factors based on ALL data will be even larger. 
; 
 
_refine_ls_structure_factor_coef  Fsqd  
_refine_ls_matrix_type            full 
_refine_ls_weighting_scheme       calc  
_refine_ls_weighting_details 
 'calc w=1/[\s^2^(Fo^2^)+(0.0240P)^2^+0.0000P] where P=(Fo^2^+2Fc^2^)/3' 
_atom_sites_solution_primary      direct 
_atom_sites_solution_secondary    difmap 
_atom_sites_solution_hydrogens    geom 
_refine_ls_hydrogen_treatment     mixed 
_refine_ls_extinction_method      SHELXL 
_refine_ls_extinction_coef        0.0058(3) 
_refine_ls_extinction_expression 
 'Fc^*^=kFc[1+0.001xFc^2^\l^3^/sin(2\q)]^-1/4^' 
_refine_ls_number_reflns          2337 
_refine_ls_number_parameters      163 
_refine_ls_number_restraints      0 
_refine_ls_R_factor_all           0.0313 
_refine_ls_R_factor_gt            0.0223 
_refine_ls_wR_factor_ref          0.0473 
_refine_ls_wR_factor_gt           0.0460 
_refine_ls_goodness_of_fit_ref    0.994 
_refine_ls_restrained_S_all       0.994 
_refine_ls_shift/su_max           0.001 
_refine_ls_shift/su_mean          0.000 
 
loop_ 
 _atom_site_label 
 _atom_site_type_symbol 
 _atom_site_fract_x 
 _atom_site_fract_y 
 _atom_site_fract_z 
 _atom_site_U_iso_or_equiv 
 _atom_site_adp_type 
 _atom_site_occupancy 
 _atom_site_symmetry_multiplicity 
 _atom_site_calc_flag 
 _atom_site_refinement_flags 
 _atom_site_disorder_assembly 
 _atom_site_disorder_group 
Er1 Er 0.275763(17) 0.042202(10) 0.134398(19) 0.01661(8) Uani 1 1 d . . . 
C4 C -0.0312(4) 0.3951(3) 0.0965(5) 0.0228(8) Uani 1 1 d . . . 
H1A H 0.0407 0.4382 0.1363 0.027 Uiso 1 1 calc R . . 
C5 C 0.0072(4) 0.3070(3) 0.0716(5) 0.0244(8) Uani 1 1 d . . . 
H2A H 0.1053 0.2903 0.0939 0.029 Uiso 1 1 calc R . . 
C1 C -0.0998(4) 0.2422(3) 0.0132(4) 0.0192(8) Uani 1 1 d . . . 
C2 C -0.2440(4) 0.2708(3) -0.0276(5) 0.0291(9) Uani 1 1 d . . . 
H4A H -0.3173 0.2293 -0.0720 0.035 Uiso 1 1 calc R . . 
C3 C -0.2794(4) 0.3601(3) -0.0026(5) 0.0294(9) Uani 1 1 d . . . 
H5A H -0.3762 0.3792 -0.0313 0.035 Uiso 1 1 calc R . . 
C6 C -0.0582(4) 0.1442(3) 0.0001(4) 0.0211(8) Uani 1 1 d . . . 
N1 N -0.1739(3) 0.4197(2) 0.0633(4) 0.0217(7) Uani 1 1 d . . . 
O1 O 0.0744(3) 0.12389(19) 0.0484(4) 0.0303(6) Uani 1 1 d . . . 
O2 O -0.1577(3) 0.08953(18) -0.0573(4) 0.0282(6) Uani 1 1 d . . . 
O3 O -0.2100(3) 0.50402(19) 0.1010(3) 0.0252(6) Uani 1 1 d . . . 
O4 O 0.4381(3) 0.13188(19) 0.0018(3) 0.0263(6) Uani 1 1 d . . . 
O5 O 0.2812(3) 0.02887(18) -0.1738(3) 0.0243(6) Uani 1 1 d . . . 
O6 O 0.5283(3) 0.04591(19) -0.2293(4) 0.0303(7) Uani 1 1 d . . . 
O7 O 0.3589(3) 0.16703(18) -0.3109(3) 0.0272(6) Uani 1 1 d . . . 
O8 O 0.3518(3) 0.1582(2) 0.3311(4) 0.0286(7) Uani 1 1 d . . . 
S1 S 0.40163(10) 0.09397(6) -0.18172(11) 0.0188(2) Uani 1 1 d . . . 
H8A H 0.365(4) 0.211(3) 0.305(5) 0.028(12) Uiso 1 1 d . . . 
H8B H 0.340(6) 0.163(4) 0.458(8) 0.084(19) Uiso 1 1 d . . . 
 
loop_ 
 _atom_site_aniso_label 
 _atom_site_aniso_U_11 
 _atom_site_aniso_U_22 
 _atom_site_aniso_U_33 
 _atom_site_aniso_U_23 
 _atom_site_aniso_U_13 
 _atom_site_aniso_U_12 
Er1 0.01599(11) 0.01488(11) 0.01879(11) -0.00006(7) 0.00269(6) -0.00015(7) 
C4 0.019(2) 0.018(2) 0.032(2) -0.0020(16) 0.0056(16) -0.0017(16) 
C5 0.0150(19) 0.026(2) 0.031(2) -0.0040(16) 0.0022(15) 0.0012(16) 
C1 0.018(2) 0.018(2) 0.0210(18) -0.0031(15) 0.0030(14) -0.0016(15) 
C2 0.021(2) 0.023(2) 0.041(2) -0.0096(18) -0.0004(17) -0.0018(17) 
C3 0.015(2) 0.028(2) 0.042(2) -0.0090(18) -0.0015(17) 0.0017(17) 
C6 0.028(2) 0.021(2) 0.0149(17) -0.0004(14) 0.0041(15) 0.0023(16) 
N1 0.0272(18) 0.0159(16) 0.0236(16) -0.0022(13) 0.0086(13) 0.0017(14) 
O1 0.0236(15) 0.0232(16) 0.0415(16) -0.0015(13) -0.0009(12) 0.0070(13) 
O2 0.0287(16) 0.0196(15) 0.0359(15) -0.0042(12) 0.0048(12) -0.0066(13) 
O3 0.0353(16) 0.0163(14) 0.0254(14) -0.0015(11) 0.0095(12) 0.0079(12) 
O4 0.0315(16) 0.0299(16) 0.0166(12) -0.0015(11) 0.0018(11) -0.0090(12) 
O5 0.0225(15) 0.0270(16) 0.0236(13) -0.0021(11) 0.0047(11) -0.0056(11) 
O6 0.0250(16) 0.0340(17) 0.0339(15) 0.0098(13) 0.0111(12) 0.0107(12) 
O7 0.0401(17) 0.0226(15) 0.0187(13) 0.0039(11) 0.0048(11) 0.0111(13) 
O8 0.0444(19) 0.0207(16) 0.0206(15) 0.0003(12) 0.0055(12) -0.0083(14) 
S1 0.0177(5) 0.0198(5) 0.0185(4) 0.0032(4) 0.0026(3) 0.0029(4) 
 
_geom_special_details 
; 
 All esds (except the esd in the dihedral angle between two l.s. planes) 
 are estimated using the full covariance matrix.  The cell esds are taken 
 into account individually in the estimation of esds in distances, angles 
 and torsion angles; correlations between esds in cell parameters are only 
 used when they are defined by crystal symmetry.  An approximate (isotropic) 
 treatment of cell esds is used for estimating esds involving l.s. planes. 
; 
 
loop_ 
 _geom_bond_atom_site_label_1 
 _geom_bond_atom_site_label_2 
 _geom_bond_distance 
 _geom_bond_site_symmetry_2 
 _geom_bond_publ_flag 
Er1 O1 2.219(3) . ? 
Er1 O6 2.244(3) 3_655 ? 
Er1 O2 2.249(3) 3 ? 
Er1 O3 2.276(2) 2_545 ? 
Er1 O8 2.292(3) . ? 
Er1 O5 2.362(3) . ? 
Er1 O4 2.362(3) . ? 
Er1 S1 2.9571(9) . ? 
C4 N1 1.353(5) . ? 
C4 C5 1.364(5) . ? 
C5 C1 1.389(5) . ? 
C1 C2 1.385(5) . ? 
C1 C6 1.499(5) . ? 
C2 C3 1.374(6) . ? 
C3 N1 1.342(5) . ? 
C6 O2 1.242(4) . ? 
C6 O1 1.256(5) . ? 
N1 O3 1.329(4) . ? 
O2 Er1 2.249(3) 3 ? 
O3 Er1 2.276(2) 2 ? 
O4 S1 1.484(3) . ? 
O5 S1 1.481(3) . ? 
O6 S1 1.473(3) . ? 
O6 Er1 2.244(3) 3_655 ? 
O7 S1 1.460(3) . ? 
 
loop_ 
 _geom_angle_atom_site_label_1 
 _geom_angle_atom_site_label_2 
 _geom_angle_atom_site_label_3 
 _geom_angle 
 _geom_angle_site_symmetry_1 
 _geom_angle_site_symmetry_3 
 _geom_angle_publ_flag 
O1 Er1 O6 176.68(10) . 3_655 ? 
O1 Er1 O2 92.45(10) . 3 ? 
O6 Er1 O2 85.23(10) 3_655 3 ? 
O1 Er1 O3 92.67(10) . 2_545 ? 
O6 Er1 O3 84.59(10) 3_655 2_545 ? 
O2 Er1 O3 79.74(9) 3 2_545 ? 
O1 Er1 O8 86.24(11) . . ? 
O6 Er1 O8 94.73(11) 3_655 . ? 
O2 Er1 O8 152.55(10) 3 . ? 
O3 Er1 O8 72.95(10) 2_545 . ? 
O1 Er1 O5 85.48(10) . . ? 
O6 Er1 O5 96.27(10) 3_655 . ? 
O2 Er1 O5 76.55(9) 3 . ? 
O3 Er1 O5 156.11(9) 2_545 . ? 
O8 Er1 O5 130.51(10) . . ? 
O1 Er1 O4 98.18(10) . . ? 
O6 Er1 O4 85.13(10) 3_655 . ? 
O2 Er1 O4 133.45(9) 3 . ? 
O3 Er1 O4 144.02(9) 2_545 . ? 
O8 Er1 O4 73.68(10) . . ? 
O5 Er1 O4 59.48(9) . . ? 
O1 Er1 S1 93.33(7) . . ? 
O6 Er1 S1 89.56(7) 3_655 . ? 
O2 Er1 S1 104.81(7) 3 . ? 
O3 Er1 S1 172.29(7) 2_545 . ? 
O8 Er1 S1 102.64(8) . . ? 
O5 Er1 S1 29.74(6) . . ? 
O4 Er1 S1 29.79(6) . . ? 
N1 C4 C5 119.9(3) . . ? 
C4 C5 C1 120.3(3) . . ? 
C2 C1 C5 118.1(4) . . ? 
C2 C1 C6 121.8(3) . . ? 
C5 C1 C6 120.1(3) . . ? 
C3 C2 C1 120.3(4) . . ? 
N1 C3 C2 119.8(4) . . ? 
O2 C6 O1 125.2(4) . . ? 
O2 C6 C1 117.4(3) . . ? 
O1 C6 C1 117.4(3) . . ? 
O3 N1 C3 119.5(3) . . ? 
O3 N1 C4 119.1(3) . . ? 
C3 N1 C4 121.4(3) . . ? 
C6 O1 Er1 160.8(3) . . ? 
C6 O2 Er1 160.8(3) . 3 ? 
N1 O3 Er1 122.7(2) . 2 ? 
S1 O4 Er1 97.92(13) . . ? 
S1 O5 Er1 98.00(13) . . ? 
S1 O6 Er1 146.67(17) . 3_655 ? 
O7 S1 O6 108.60(15) . . ? 
O7 S1 O5 112.73(16) . . ? 
O6 S1 O5 110.10(16) . . ? 
O7 S1 O4 110.17(16) . . ? 
O6 S1 O4 110.78(17) . . ? 
O5 S1 O4 104.44(15) . . ? 
O7 S1 Er1 129.52(11) . . ? 
O6 S1 Er1 121.87(11) . . ? 
O5 S1 Er1 52.27(10) . . ? 
O4 S1 Er1 52.29(10) . . ? 
 
loop_ 
 _geom_hbond_atom_site_label_D 
 _geom_hbond_atom_site_label_H 
 _geom_hbond_atom_site_label_A 
 _geom_hbond_distance_DH 
 _geom_hbond_distance_HA 
 _geom_hbond_distance_DA 
 _geom_hbond_angle_DHA 
 _geom_hbond_site_symmetry_A 
O8 H8A O7  0.82(5) 1.99(5) 2.790(4) 166(4) 4_566 
O8 H8B O7  1.00(6) 1.73(6) 2.715(4) 168(5) 1_556 
 
_diffrn_measured_fraction_theta_max    0.997 
_diffrn_reflns_theta_full              27.49 
_diffrn_measured_fraction_theta_full   0.997 
_refine_diff_density_max    0.862 
_refine_diff_density_min   -1.195 
_refine_diff_density_rms    0.152 

#===END


## Crystallographic Data of Complex 12

data_12 
 
_audit_creation_method            SHELXL-97 
_chemical_name_systematic 
; 
 ? 
; 
_chemical_name_common             ? 
_chemical_melting_point           ? 
_chemical_formula_moiety          ? 
_chemical_formula_sum 
 'C6 H6 N O8 S Tm' 
_chemical_formula_weight          421.11 
 
loop_ 
 _atom_type_symbol 
 _atom_type_description 
 _atom_type_scat_dispersion_real 
 _atom_type_scat_dispersion_imag 
 _atom_type_scat_source 
 'C'  'C'   0.0033   0.0016 
 'International Tables Vol C Tables 4.2.6.8 and 6.1.1.4' 
 'H'  'H'   0.0000   0.0000 
 'International Tables Vol C Tables 4.2.6.8 and 6.1.1.4' 
 'N'  'N'   0.0061   0.0033 
 'International Tables Vol C Tables 4.2.6.8 and 6.1.1.4' 
 'O'  'O'   0.0106   0.0060 
 'International Tables Vol C Tables 4.2.6.8 and 6.1.1.4' 
 'Tm'  'Tm'  -0.3139   5.2483 
 'International Tables Vol C Tables 4.2.6.8 and 6.1.1.4' 
 'S'  'S'   0.1246   0.1234 
 'International Tables Vol C Tables 4.2.6.8 and 6.1.1.4' 
 
_symmetry_cell_setting            'monoclinic' 
_symmetry_space_group_name_H-M    'P21/c' 
 
loop_ 
 _symmetry_equiv_pos_as_xyz 
 'x, y, z' 
 '-x, y+1/2, -z+1/2' 
 '-x, -y, -z' 
 'x, -y-1/2, z-1/2' 
 
_cell_length_a                    9.2764(4) 
_cell_length_b                    14.6665(9) 
_cell_length_c                    7.5969(6) 
_cell_angle_alpha                 90.00 
_cell_angle_beta                  100.370(2) 
_cell_angle_gamma                 90.00 
_cell_volume                      1016.69(11) 
_cell_formula_units_Z             4 
_cell_measurement_temperature     293(2) 
_cell_measurement_reflns_used     30535
_cell_measurement_theta_min        3.395
_cell_measurement_theta_max        27.485
 
_exptl_crystal_description        'block' 
_exptl_crystal_colour             'colorless' 
_exptl_crystal_size_max           0.07 
_exptl_crystal_size_mid           0.07 
_exptl_crystal_size_min           0.06 
_exptl_crystal_density_meas       ? 
_exptl_crystal_density_diffrn     2.751 
_exptl_crystal_density_method     'not measured' 
_exptl_crystal_F_000              792 
_exptl_absorpt_coefficient_mu     8.964 
_exptl_absorpt_correction_type    empirical 
_exptl_absorpt_correction_T_min   0.385 
_exptl_absorpt_correction_T_max   0.664 
_exptl_absorpt_process_details    '(Blessing, 1995, 1997)' 
 
_exptl_special_details 
; 
 ? 
; 
 
_diffrn_ambient_temperature       293(2) 
_diffrn_radiation_wavelength      0.71073 
_diffrn_radiation_type            MoK\a 
_diffrn_radiation_source          'fine-focus sealed tube' 
_diffrn_radiation_monochromator   graphite 
_diffrn_measurement_device_type   'NONIUS KappaCCD Diffractometer' 
_diffrn_measurement_method        'CCD' 
_diffrn_detector_area_resol_mean  0.76 
_diffrn_standards_number          ? 
_diffrn_standards_interval_count  ? 
_diffrn_standards_interval_time   ? 
_diffrn_standards_decay_%         none 
_diffrn_reflns_number             18029 
_diffrn_reflns_av_R_equivalents   0.1095 
_diffrn_reflns_av_sigmaI/netI     0.0938 
_diffrn_reflns_limit_h_min        -12 
_diffrn_reflns_limit_h_max        12 
_diffrn_reflns_limit_k_min        -19 
_diffrn_reflns_limit_k_max        19 
_diffrn_reflns_limit_l_min        -9 
_diffrn_reflns_limit_l_max        9 
_diffrn_reflns_theta_min          3.49 
_diffrn_reflns_theta_max          27.54 
_reflns_number_total              2333 
_reflns_number_gt                 1510 
_reflns_threshold_expression      >2sigma(I) 
 
_computing_data_collection        'KappaCCD (Nonius B. V., 1998)' 
_computing_cell_refinement        'HKL Scalepack (Otwinowski & Minor, 1997)' 
_computing_data_reduction
'HKL Denzo (Otwinowski & Minor, 1997) & maXus (Mackay et al., 1998)'
_computing_structure_solution     'SHELXS-97 (Sheldrick, 1997)' 
_computing_structure_refinement   'SHELXL-97 (Sheldrick, 1997)' 
_computing_molecular_graphics     'Bruker SHELXTL V5.1 (Sheldrick, 1998)' 
_computing_publication_material   'SHELXL-97 (Sheldrick, 1997)' 

_publ_section_references
;
collect:
"Collect" data collection software, Nonius B.V., Delft, The Netherlands, 1998.

HKL Scalepack & HKL Denzo:
Z. Otwinowski and W. Minor, " Processing of X-ray Diffraction Data Collected
in Oscillation Mode ", Methods in Enzymology, Volume 276: Macromolecular
Crystallography, part A, p.307-326, 1997,C.W. Carter, Jr. & R.M. Sweet,
Eds., Academic Press, London.

absorption correction:
R.H. Blessing (1995) Acta Cryst. A51, 33-37.
R.H. Blessing (1997) J.Appl. Cryst. 30, 421-426.

maXus: 
S.Mackay, C.J.Gilmore, C.Edwards, M. Tremayne, N. Stuart, K.Shankland
"maXus: a computer program for the solution and refinement of crystal
structures from diffraction data", University of Glasgow, Scotland, UK,
Nonius BV, Delft, The Netherlands and MacScience Co. Ltd., Yokohama,
Japan (1998).

Sheldrick, G. M. (1998). SHELXTL Version 5.1. Bruker Analytical X-ray
Instruments Inc., Madison, Wisconsin, USA.

Sheldrick, G. M. (1997). SHELX-97. PC Version. University of Goettingen,
Germany.
;
 
_refine_special_details 
; 
 Refinement of F^2^ against ALL reflections.  The weighted R-factor wR and 
 goodness of fit S are based on F^2^, conventional R-factors R are based 
 on F, with F set to zero for negative F^2^. The threshold expression of 
 F^2^ > 2sigma(F^2^) is used only for calculating R-factors(gt) etc. and is 
 not relevant to the choice of reflections for refinement.  R-factors based 
 on F^2^ are statistically about twice as large as those based on F, and R- 
 factors based on ALL data will be even larger. 
; 
 
_refine_ls_structure_factor_coef  Fsqd  
_refine_ls_matrix_type            full 
_refine_ls_weighting_scheme       calc  
_refine_ls_weighting_details 
 'calc w=1/[\s^2^(Fo^2^)+(0.0180P)^2^+0.0000P] where P=(Fo^2^+2Fc^2^)/3' 
_atom_sites_solution_primary      direct 
_atom_sites_solution_secondary    difmap 
_atom_sites_solution_hydrogens    geom 
_refine_ls_hydrogen_treatment     mixed 
_refine_ls_extinction_method      SHELXL 
_refine_ls_extinction_coef        0.00128(18) 
_refine_ls_extinction_expression 
 'Fc^*^=kFc[1+0.001xFc^2^\l^3^/sin(2\q)]^-1/4^' 
_refine_ls_number_reflns          2333 
_refine_ls_number_parameters      163 
_refine_ls_number_restraints      0 
_refine_ls_R_factor_all           0.0712 
_refine_ls_R_factor_gt            0.0320 
_refine_ls_wR_factor_ref          0.0531 
_refine_ls_wR_factor_gt           0.0484 
_refine_ls_goodness_of_fit_ref    0.866 
_refine_ls_restrained_S_all       0.866 
_refine_ls_shift/su_max           0.000 
_refine_ls_shift/su_mean          0.000 
 
loop_ 
 _atom_site_label 
 _atom_site_type_symbol 
 _atom_site_fract_x 
 _atom_site_fract_y 
 _atom_site_fract_z 
 _atom_site_U_iso_or_equiv 
 _atom_site_adp_type 
 _atom_site_occupancy 
 _atom_site_symmetry_multiplicity 
 _atom_site_calc_flag 
 _atom_site_refinement_flags 
 _atom_site_disorder_assembly 
 _atom_site_disorder_group 
Tm1 Tm 0.27567(3) 0.042177(17) 0.13406(3) 0.02331(11) Uani 1 1 d . . . 
C4 C -0.0324(7) 0.3948(4) 0.0963(7) 0.0275(14) Uani 1 1 d . . . 
H1A H 0.0396 0.4380 0.1363 0.033 Uiso 1 1 calc R . . 
C5 C 0.0062(6) 0.3068(4) 0.0713(7) 0.0283(14) Uani 1 1 d . . . 
H2A H 0.1046 0.2903 0.0939 0.034 Uiso 1 1 calc R . . 
C1 C -0.0995(6) 0.2414(4) 0.0128(7) 0.0257(14) Uani 1 1 d . . . 
C2 C -0.2430(7) 0.2713(4) -0.0260(8) 0.0346(16) Uani 1 1 d . . . 
H4A H -0.3166 0.2298 -0.0694 0.041 Uiso 1 1 calc R . . 
C3 C -0.2798(7) 0.3603(4) -0.0024(8) 0.0340(16) Uani 1 1 d . . . 
H5A H -0.3769 0.3793 -0.0316 0.041 Uiso 1 1 calc R . . 
C6 C -0.0580(7) 0.1429(4) 0.0007(7) 0.0262(14) Uani 1 1 d . . . 
N1 N -0.1742(5) 0.4194(3) 0.0632(6) 0.0267(12) Uani 1 1 d . . . 
O1 O 0.0748(4) 0.1233(3) 0.0489(5) 0.0364(11) Uani 1 1 d . . . 
O2 O -0.1573(4) 0.0881(3) -0.0577(5) 0.0330(10) Uani 1 1 d . . . 
O3 O -0.2097(4) 0.5045(3) 0.1018(5) 0.0303(10) Uani 1 1 d . . . 
O4 O 0.4371(4) 0.1315(3) 0.0028(4) 0.0314(10) Uani 1 1 d . . . 
O5 O 0.2820(4) 0.0286(3) -0.1734(5) 0.0307(10) Uani 1 1 d . . . 
O6 O 0.5288(4) 0.0452(3) -0.2278(5) 0.0360(10) Uani 1 1 d . . . 
O7 O 0.3590(4) 0.1669(3) -0.3105(5) 0.0325(10) Uani 1 1 d . . . 
O8 O 0.3523(5) 0.1580(3) 0.3309(7) 0.0353(12) Uani 1 1 d . . . 
S1 S 0.40178(16) 0.09367(10) -0.18167(19) 0.0257(4) Uani 1 1 d . . . 
H8A H 0.361(7) 0.209(5) 0.297(8) 0.05(2) Uiso 1 1 d . . . 
H8B H 0.329(10) 0.160(6) 0.434(11) 0.11(4) Uiso 1 1 d . . . 
 
loop_ 
 _atom_site_aniso_label 
 _atom_site_aniso_U_11 
 _atom_site_aniso_U_22 
 _atom_site_aniso_U_33 
 _atom_site_aniso_U_23 
 _atom_site_aniso_U_13 
 _atom_site_aniso_U_12 
Tm1 0.02028(16) 0.02181(15) 0.02668(16) 0.00007(14) 0.00111(10) -0.00017(14) 
C4 0.026(4) 0.025(3) 0.030(3) -0.003(3) 0.001(3) -0.006(3) 
C5 0.020(4) 0.028(3) 0.037(3) -0.005(3) 0.005(3) 0.001(3) 
C1 0.014(3) 0.031(4) 0.031(3) -0.002(3) 0.001(2) 0.003(3) 
C2 0.025(4) 0.027(4) 0.049(4) -0.007(3) 0.000(3) -0.002(3) 
C3 0.015(3) 0.031(4) 0.052(4) 0.000(3) -0.002(3) 0.005(3) 
C6 0.035(4) 0.020(3) 0.025(3) -0.001(3) 0.007(3) 0.007(3) 
N1 0.029(3) 0.023(3) 0.028(3) -0.003(2) 0.004(2) -0.001(2) 
O1 0.028(3) 0.034(3) 0.045(3) -0.006(2) 0.000(2) 0.008(2) 
O2 0.032(3) 0.024(2) 0.039(3) -0.006(2) -0.002(2) -0.002(2) 
O3 0.040(3) 0.016(2) 0.035(3) -0.0021(19) 0.006(2) 0.007(2) 
O4 0.035(3) 0.034(2) 0.024(2) 0.0019(19) 0.0026(18) -0.013(2) 
O5 0.026(2) 0.036(3) 0.031(2) -0.0036(19) 0.0047(17) -0.0062(19) 
O6 0.030(2) 0.041(3) 0.039(2) 0.007(2) 0.0115(19) 0.013(2) 
O7 0.039(3) 0.028(2) 0.028(2) 0.0070(19) -0.0003(19) 0.011(2) 
O8 0.049(3) 0.028(3) 0.030(3) 0.002(2) 0.008(2) -0.009(2) 
S1 0.0219(9) 0.0265(9) 0.0274(8) 0.0036(7) 0.0009(6) 0.0019(7) 
 
_geom_special_details 
; 
 All esds (except the esd in the dihedral angle between two l.s. planes) 
 are estimated using the full covariance matrix.  The cell esds are taken 
 into account individually in the estimation of esds in distances, angles 
 and torsion angles; correlations between esds in cell parameters are only 
 used when they are defined by crystal symmetry.  An approximate (isotropic) 
 treatment of cell esds is used for estimating esds involving l.s. planes. 
; 
 
loop_ 
 _geom_bond_atom_site_label_1 
 _geom_bond_atom_site_label_2 
 _geom_bond_distance 
 _geom_bond_site_symmetry_2 
 _geom_bond_publ_flag 
Tm1 O1 2.207(4) . ? 
Tm1 O2 2.228(4) 3 ? 
Tm1 O6 2.230(4) 3_655 ? 
Tm1 O3 2.269(4) 2_545 ? 
Tm1 O8 2.290(4) . ? 
Tm1 O4 2.344(4) . ? 
Tm1 O5 2.356(4) . ? 
Tm1 S1 2.9500(15) . ? 
C4 N1 1.344(7) . ? 
C4 C5 1.362(8) . ? 
C5 C1 1.386(7) . ? 
C1 C2 1.381(7) . ? 
C1 C6 1.502(7) . ? 
C2 C3 1.370(8) . ? 
C3 N1 1.335(7) . ? 
C6 O2 1.242(7) . ? 
C6 O1 1.254(7) . ? 
N1 O3 1.337(6) . ? 
O2 Tm1 2.228(4) 3 ? 
O3 Tm1 2.269(4) 2 ? 
O4 S1 1.488(4) . ? 
O5 S1 1.475(4) . ? 
O6 S1 1.472(4) . ? 
O6 Tm1 2.230(4) 3_655 ? 
O7 S1 1.459(4) . ? 
 
loop_ 
 _geom_angle_atom_site_label_1 
 _geom_angle_atom_site_label_2 
 _geom_angle_atom_site_label_3 
 _geom_angle 
 _geom_angle_site_symmetry_1 
 _geom_angle_site_symmetry_3 
 _geom_angle_publ_flag 
O1 Tm1 O2 92.01(15) . 3 ? 
O1 Tm1 O6 176.77(15) . 3_655 ? 
O2 Tm1 O6 85.71(15) 3 3_655 ? 
O1 Tm1 O3 92.45(15) . 2_545 ? 
O2 Tm1 O3 79.77(14) 3 2_545 ? 
O6 Tm1 O3 84.91(14) 3_655 2_545 ? 
O1 Tm1 O8 86.47(16) . . ? 
O2 Tm1 O8 152.44(17) 3 . ? 
O6 Tm1 O8 94.50(16) 3_655 . ? 
O3 Tm1 O8 72.82(16) 2_545 . ? 
O1 Tm1 O4 98.29(15) . . ? 
O2 Tm1 O4 133.76(14) 3 . ? 
O6 Tm1 O4 84.94(14) 3_655 . ? 
O3 Tm1 O4 143.84(13) 2_545 . ? 
O8 Tm1 O4 73.51(16) . . ? 
O1 Tm1 O5 85.72(14) . . ? 
O2 Tm1 O5 76.61(14) 3 . ? 
O6 Tm1 O5 95.95(14) 3_655 . ? 
O3 Tm1 O5 156.22(14) 2_545 . ? 
O8 Tm1 O5 130.56(16) . . ? 
O4 Tm1 O5 59.56(12) . . ? 
O1 Tm1 S1 93.50(11) . . ? 
O2 Tm1 S1 104.89(11) 3 . ? 
O6 Tm1 S1 89.29(10) 3_655 . ? 
O3 Tm1 S1 172.29(10) 2_545 . ? 
O8 Tm1 S1 102.66(14) . . ? 
O4 Tm1 S1 29.94(9) . . ? 
O5 Tm1 S1 29.67(9) . . ? 
N1 C4 C5 120.1(5) . . ? 
C4 C5 C1 120.8(5) . . ? 
C2 C1 C5 116.6(5) . . ? 
C2 C1 C6 122.6(5) . . ? 
C5 C1 C6 120.7(5) . . ? 
C3 C2 C1 121.9(6) . . ? 
N1 C3 C2 118.9(6) . . ? 
O2 C6 O1 125.6(5) . . ? 
O2 C6 C1 117.6(5) . . ? 
O1 C6 C1 116.9(5) . . ? 
C3 N1 O3 119.6(5) . . ? 
C3 N1 C4 121.6(5) . . ? 
O3 N1 C4 118.7(5) . . ? 
C6 O1 Tm1 160.5(4) . . ? 
C6 O2 Tm1 161.2(4) . 3 ? 
N1 O3 Tm1 122.5(3) . 2 ? 
S1 O4 Tm1 98.22(19) . . ? 
S1 O5 Tm1 98.08(18) . . ? 
S1 O6 Tm1 147.3(2) . 3_655 ? 
O7 S1 O6 109.2(2) . . ? 
O7 S1 O5 112.9(2) . . ? 
O6 S1 O5 109.8(2) . . ? 
O7 S1 O4 110.1(2) . . ? 
O6 S1 O4 110.8(2) . . ? 
O5 S1 O4 104.0(2) . . ? 
O7 S1 Tm1 129.36(18) . . ? 
O6 S1 Tm1 121.42(17) . . ? 
O5 S1 Tm1 52.25(15) . . ? 
O4 S1 Tm1 51.84(15) . . ? 
 
loop_ 
 _geom_hbond_atom_site_label_D 
 _geom_hbond_atom_site_label_H 
 _geom_hbond_atom_site_label_A 
 _geom_hbond_distance_DH 
 _geom_hbond_distance_HA 
 _geom_hbond_distance_DA 
 _geom_hbond_angle_DHA 
 _geom_hbond_site_symmetry_A 
O8 H8A O7  0.80(7) 1.99(7) 2.789(6) 172(6) 4_566 
O8 H8B O7  0.85(8) 1.91(8) 2.717(6) 157(9) 1_556 
 
_diffrn_measured_fraction_theta_max    0.996 
_diffrn_reflns_theta_full              27.54 
_diffrn_measured_fraction_theta_full   0.996 
_refine_diff_density_max    1.647 
_refine_diff_density_min   -1.196 
_refine_diff_density_rms    0.201 

#===END


## Crystallographic Data of Complex 13

data_13 
 
_audit_creation_method            SHELXL-97 
_chemical_name_systematic 
; 
 ? 
; 
_chemical_name_common             ? 
_chemical_melting_point           ? 
_chemical_formula_moiety          ? 
_chemical_formula_sum 
 'C6 H6 N O8 S Yb' 
_chemical_formula_weight          425.22 
 
loop_ 
 _atom_type_symbol 
 _atom_type_description 
 _atom_type_scat_dispersion_real 
 _atom_type_scat_dispersion_imag 
 _atom_type_scat_source 
 'C'  'C'   0.0033   0.0016 
 'International Tables Vol C Tables 4.2.6.8 and 6.1.1.4' 
 'H'  'H'   0.0000   0.0000 
 'International Tables Vol C Tables 4.2.6.8 and 6.1.1.4' 
 'N'  'N'   0.0061   0.0033 
 'International Tables Vol C Tables 4.2.6.8 and 6.1.1.4' 
 'O'  'O'   0.0106   0.0060 
 'International Tables Vol C Tables 4.2.6.8 and 6.1.1.4' 
 'Yb'  'Yb'  -0.3850   5.5486 
 'International Tables Vol C Tables 4.2.6.8 and 6.1.1.4' 
 'S'  'S'   0.1246   0.1234 
 'International Tables Vol C Tables 4.2.6.8 and 6.1.1.4' 
 
_symmetry_cell_setting            'monoclinic' 
_symmetry_space_group_name_H-M    'P21/c' 
 
loop_ 
 _symmetry_equiv_pos_as_xyz 
 'x, y, z' 
 '-x, y+1/2, -z+1/2' 
 '-x, -y, -z' 
 'x, -y-1/2, z-1/2' 
 
_cell_length_a                    9.2635(2) 
_cell_length_b                    14.6315(4) 
_cell_length_c                    7.5815(3) 
_cell_angle_alpha                 90.00 
_cell_angle_beta                  100.3649(12) 
_cell_angle_gamma                 90.00 
_cell_volume                      1010.82(5) 
_cell_formula_units_Z             4 
_cell_measurement_temperature     293(2) 
_cell_measurement_reflns_used     10390
_cell_measurement_theta_min        3.90
_cell_measurement_theta_max        27.50
 
_exptl_crystal_description        'block' 
_exptl_crystal_colour             'pale yellow' 
_exptl_crystal_size_max           0.11 
_exptl_crystal_size_mid           0.09 
_exptl_crystal_size_min           0.06 
_exptl_crystal_density_meas       ? 
_exptl_crystal_density_diffrn     2.794 
_exptl_crystal_density_method     'not measured' 
_exptl_crystal_F_000              796 
_exptl_absorpt_coefficient_mu     9.491 
_exptl_absorpt_correction_type    empirical 
_exptl_absorpt_correction_T_min   0.403 
_exptl_absorpt_correction_T_max   0.578 
_exptl_absorpt_process_details    '(Blessing, 1995, 1997)' 
 
_exptl_special_details 
; 
 ? 
; 
 
_diffrn_ambient_temperature       293(2) 
_diffrn_radiation_wavelength      0.71073 
_diffrn_radiation_type            MoK\a 
_diffrn_radiation_source          'fine-focus sealed tube' 
_diffrn_radiation_monochromator   graphite 
_diffrn_measurement_device_type   'NONIUS KappaCCD Diffractometer' 
_diffrn_measurement_method        'CCD' 
_diffrn_detector_area_resol_mean  0.76 
_diffrn_standards_number          ? 
_diffrn_standards_interval_count  ? 
_diffrn_standards_interval_time   ? 
_diffrn_standards_decay_%         none 
_diffrn_reflns_number             20224 
_diffrn_reflns_av_R_equivalents   0.1316 
_diffrn_reflns_av_sigmaI/netI     0.0930 
_diffrn_reflns_limit_h_min        -12 
_diffrn_reflns_limit_h_max        12 
_diffrn_reflns_limit_k_min        -18 
_diffrn_reflns_limit_k_max        18 
_diffrn_reflns_limit_l_min        -9 
_diffrn_reflns_limit_l_max        9 
_diffrn_reflns_theta_min          3.90 
_diffrn_reflns_theta_max          27.50 
_reflns_number_total              2313 
_reflns_number_gt                 1522 
_reflns_threshold_expression      >2sigma(I) 
 
_computing_data_collection        'KappaCCD (Nonius B. V., 1998)' 
_computing_cell_refinement        'HKL Scalepack (Otwinowski & Minor, 1997)' 
_computing_data_reduction
'HKL Denzo (Otwinowski & Minor, 1997) & maXus (Mackay et al., 1998)'
_computing_structure_solution     'SHELXS-97 (Sheldrick, 1997)' 
_computing_structure_refinement   'SHELXL-97 (Sheldrick, 1997)' 
_computing_molecular_graphics     'Bruker SHELXTL V5.1 (Sheldrick, 1998)' 
_computing_publication_material   'SHELXL-97 (Sheldrick, 1997)' 

_publ_section_references
;
collect:
"Collect" data collection software, Nonius B.V., Delft, The Netherlands, 1998.

HKL Scalepack & HKL Denzo:
Z. Otwinowski and W. Minor, " Processing of X-ray Diffraction Data Collected
in Oscillation Mode ", Methods in Enzymology, Volume 276: Macromolecular
Crystallography, part A, p.307-326, 1997,C.W. Carter, Jr. & R.M. Sweet,
Eds., Academic Press, London.

absorption correction:
R.H. Blessing (1995) Acta Cryst. A51, 33-37.
R.H. Blessing (1997) J.Appl. Cryst. 30, 421-426.

maXus: 
S.Mackay, C.J.Gilmore, C.Edwards, M. Tremayne, N. Stuart, K.Shankland
"maXus: a computer program for the solution and refinement of crystal
structures from diffraction data", University of Glasgow, Scotland, UK,
Nonius BV, Delft, The Netherlands and MacScience Co. Ltd., Yokohama,
Japan (1998).

Sheldrick, G. M. (1998). SHELXTL Version 5.1. Bruker Analytical X-ray
Instruments Inc., Madison, Wisconsin, USA.

Sheldrick, G. M. (1997). SHELX-97. PC Version. University of Goettingen,
Germany.
;
 
_refine_special_details 
; 
 Refinement of F^2^ against ALL reflections.  The weighted R-factor wR and 
 goodness of fit S are based on F^2^, conventional R-factors R are based 
 on F, with F set to zero for negative F^2^. The threshold expression of 
 F^2^ > 2sigma(F^2^) is used only for calculating R-factors(gt) etc. and is 
 not relevant to the choice of reflections for refinement.  R-factors based 
 on F^2^ are statistically about twice as large as those based on F, and R- 
 factors based on ALL data will be even larger. 
; 
 
_refine_ls_structure_factor_coef  Fsqd  
_refine_ls_matrix_type            full 
_refine_ls_weighting_scheme       calc  
_refine_ls_weighting_details 
 'calc w=1/[\s^2^(Fo^2^)+(0.0260P)^2^+0.0000P] where P=(Fo^2^+2Fc^2^)/3' 
_atom_sites_solution_primary      direct 
_atom_sites_solution_secondary    difmap 
_atom_sites_solution_hydrogens    geom 
_refine_ls_hydrogen_treatment     mixed 
_refine_ls_extinction_method      SHELXL 
_refine_ls_extinction_coef        0.0053(3) 
_refine_ls_extinction_expression 
 'Fc^*^=kFc[1+0.001xFc^2^\l^3^/sin(2\q)]^-1/4^' 
_refine_ls_number_reflns          2313 
_refine_ls_number_parameters      163 
_refine_ls_number_restraints      3 
_refine_ls_R_factor_all           0.0704 
_refine_ls_R_factor_gt            0.0338 
_refine_ls_wR_factor_ref          0.0632 
_refine_ls_wR_factor_gt           0.0586 
_refine_ls_goodness_of_fit_ref    0.872 
_refine_ls_restrained_S_all       0.871 
_refine_ls_shift/su_max           0.000 
_refine_ls_shift/su_mean          0.000 
 
loop_ 
 _atom_site_label 
 _atom_site_type_symbol 
 _atom_site_fract_x 
 _atom_site_fract_y 
 _atom_site_fract_z 
 _atom_site_U_iso_or_equiv 
 _atom_site_adp_type 
 _atom_site_occupancy 
 _atom_site_symmetry_multiplicity 
 _atom_site_calc_flag 
 _atom_site_refinement_flags 
 _atom_site_disorder_assembly 
 _atom_site_disorder_group 
Yb1 Yb 0.27552(3) 0.042071(18) 0.13385(4) 0.01972(13) Uani 1 1 d . . . 
C4 C -0.0315(8) 0.3961(5) 0.0968(9) 0.0276(17) Uani 1 1 d . . . 
H1A H 0.0401 0.4398 0.1353 0.033 Uiso 1 1 calc R . . 
C5 C 0.0074(8) 0.3072(4) 0.0719(9) 0.0258(17) Uani 1 1 d . . . 
H2A H 0.1059 0.2906 0.0950 0.031 Uiso 1 1 calc R . . 
C1 C -0.0977(7) 0.2427(4) 0.0134(8) 0.0223(15) Uani 1 1 d . . . 
C2 C -0.2438(8) 0.2700(5) -0.0251(10) 0.0327(18) Uani 1 1 d . . . 
H4A H -0.3170 0.2277 -0.0667 0.039 Uiso 1 1 calc R . . 
C3 C -0.2792(8) 0.3596(4) -0.0012(10) 0.0297(18) Uani 1 1 d . . . 
H5A H -0.3763 0.3787 -0.0311 0.036 Uiso 1 1 calc R . . 
C6 C -0.0571(8) 0.1429(4) -0.0005(8) 0.0221(16) Uani 1 1 d . . . 
N1 N -0.1744(6) 0.4195(4) 0.0648(7) 0.0228(13) Uani 1 1 d . . . 
O1 O 0.0758(5) 0.1238(3) 0.0491(6) 0.0307(12) Uani 1 1 d . . . 
O2 O -0.1571(5) 0.0881(3) -0.0577(6) 0.0293(12) Uani 1 1 d . . . 
O3 O -0.2101(5) 0.5051(3) 0.1026(6) 0.0283(12) Uani 1 1 d . . . 
O4 O 0.4369(5) 0.1317(3) 0.0040(6) 0.0275(11) Uani 1 1 d . . . 
O5 O 0.2818(5) 0.0281(3) -0.1729(6) 0.0251(11) Uani 1 1 d . . . 
O6 O 0.5293(5) 0.0459(3) -0.2271(6) 0.0319(11) Uani 1 1 d . . . 
O7 O 0.3602(5) 0.1669(3) -0.3108(6) 0.0261(11) Uani 1 1 d . . . 
O8 O 0.3508(6) 0.1584(3) 0.3299(6) 0.0317(12) Uani 1 1 d D . . 
S1 S 0.40201(19) 0.09357(11) -0.1808(2) 0.0221(4) Uani 1 1 d . . . 
H8A H 0.360(17) 0.220(3) 0.289(12) 0.20(7) Uiso 1 1 d D . . 
H8B H 0.347(10) 0.164(6) 0.455(4) 0.08(3) Uiso 1 1 d D . . 
 
loop_ 
 _atom_site_aniso_label 
 _atom_site_aniso_U_11 
 _atom_site_aniso_U_22 
 _atom_site_aniso_U_33 
 _atom_site_aniso_U_23 
 _atom_site_aniso_U_13 
 _atom_site_aniso_U_12 
Yb1 0.02135(18) 0.01523(16) 0.02232(17) 0.00021(15) 0.00327(11) -0.00006(15) 
C4 0.024(4) 0.026(4) 0.031(4) 0.001(3) 0.003(3) -0.003(3) 
C5 0.021(4) 0.021(4) 0.034(4) -0.004(3) 0.001(3) -0.002(3) 
C1 0.021(4) 0.022(4) 0.024(4) -0.006(3) 0.003(3) 0.003(3) 
C2 0.028(5) 0.016(4) 0.052(5) -0.004(3) 0.004(4) -0.004(3) 
C3 0.019(4) 0.019(4) 0.049(5) -0.004(3) 0.000(3) 0.005(3) 
C6 0.032(5) 0.014(4) 0.018(4) 0.000(3) -0.001(3) 0.009(3) 
N1 0.030(4) 0.013(3) 0.026(3) 0.000(2) 0.007(3) 0.004(3) 
O1 0.028(3) 0.023(3) 0.040(3) -0.001(2) 0.002(2) 0.005(2) 
O2 0.036(3) 0.017(2) 0.034(3) -0.004(2) 0.005(2) -0.004(2) 
O3 0.043(3) 0.012(2) 0.031(3) -0.006(2) 0.008(2) 0.008(2) 
O4 0.036(3) 0.028(3) 0.018(2) -0.002(2) 0.002(2) -0.009(2) 
O5 0.022(3) 0.025(3) 0.028(3) -0.005(2) 0.005(2) -0.007(2) 
O6 0.024(3) 0.036(3) 0.037(3) 0.008(3) 0.011(2) 0.012(2) 
O7 0.037(3) 0.021(2) 0.020(3) 0.006(2) 0.004(2) 0.007(2) 
O8 0.048(4) 0.025(3) 0.022(3) -0.005(2) 0.007(3) -0.008(2) 
S1 0.0233(10) 0.0205(9) 0.0220(9) 0.0041(7) 0.0028(7) 0.0030(7) 
 
_geom_special_details 
; 
 All esds (except the esd in the dihedral angle between two l.s. planes) 
 are estimated using the full covariance matrix.  The cell esds are taken 
 into account individually in the estimation of esds in distances, angles 
 and torsion angles; correlations between esds in cell parameters are only 
 used when they are defined by crystal symmetry.  An approximate (isotropic) 
 treatment of cell esds is used for estimating esds involving l.s. planes. 
; 
 
loop_ 
 _geom_bond_atom_site_label_1 
 _geom_bond_atom_site_label_2 
 _geom_bond_distance 
 _geom_bond_site_symmetry_2 
 _geom_bond_publ_flag 
Yb1 O1 2.200(5) . ? 
Yb1 O2 2.222(4) 3 ? 
Yb1 O6 2.228(4) 3_655 ? 
Yb1 O3 2.256(4) 2_545 ? 
Yb1 O8 2.285(4) . ? 
Yb1 O4 2.336(4) . ? 
Yb1 O5 2.346(4) . ? 
Yb1 S1 2.9388(17) . ? 
C4 N1 1.347(9) . ? 
C4 C5 1.371(9) . ? 
C5 C1 1.371(9) . ? 
C1 C2 1.391(9) . ? 
C1 C6 1.516(9) . ? 
C2 C3 1.371(9) . ? 
C3 N1 1.336(8) . ? 
C6 O2 1.243(8) . ? 
C6 O1 1.252(8) . ? 
N1 O3 1.339(7) . ? 
O2 Yb1 2.222(4) 3 ? 
O3 Yb1 2.256(4) 2 ? 
O4 S1 1.488(4) . ? 
O5 S1 1.478(5) . ? 
O6 S1 1.466(5) . ? 
O6 Yb1 2.228(4) 3_655 ? 
O7 S1 1.461(4) . ? 
 
loop_ 
 _geom_angle_atom_site_label_1 
 _geom_angle_atom_site_label_2 
 _geom_angle_atom_site_label_3 
 _geom_angle 
 _geom_angle_site_symmetry_1 
 _geom_angle_site_symmetry_3 
 _geom_angle_publ_flag 
O1 Yb1 O2 92.31(18) . 3 ? 
O1 Yb1 O6 176.91(17) . 3_655 ? 
O2 Yb1 O6 85.52(18) 3 3_655 ? 
O1 Yb1 O3 92.48(17) . 2_545 ? 
O2 Yb1 O3 79.97(17) 3 2_545 ? 
O6 Yb1 O3 84.98(17) 3_655 2_545 ? 
O1 Yb1 O8 85.82(18) . . ? 
O2 Yb1 O8 152.42(18) 3 . ? 
O6 Yb1 O8 95.07(18) 3_655 . ? 
O3 Yb1 O8 72.64(17) 2_545 . ? 
O1 Yb1 O4 98.03(17) . . ? 
O2 Yb1 O4 134.06(16) 3 . ? 
O6 Yb1 O4 85.06(16) 3_655 . ? 
O3 Yb1 O4 143.38(15) 2_545 . ? 
O8 Yb1 O4 73.28(17) . . ? 
O1 Yb1 O5 85.83(16) . . ? 
O2 Yb1 O5 76.53(16) 3 . ? 
O6 Yb1 O5 95.79(17) 3_655 . ? 
O3 Yb1 O5 156.34(16) 2_545 . ? 
O8 Yb1 O5 130.59(16) . . ? 
O4 Yb1 O5 59.92(14) . . ? 
O1 Yb1 S1 93.47(13) . . ? 
O2 Yb1 S1 105.02(13) 3 . ? 
O6 Yb1 S1 89.22(12) 3_655 . ? 
O3 Yb1 S1 172.06(13) 2_545 . ? 
O8 Yb1 S1 102.56(13) . . ? 
O4 Yb1 S1 30.10(11) . . ? 
O5 Yb1 S1 29.87(11) . . ? 
N1 C4 C5 119.4(6) . . ? 
C1 C5 C4 120.6(7) . . ? 
C5 C1 C2 118.5(6) . . ? 
C5 C1 C6 121.0(6) . . ? 
C2 C1 C6 120.4(6) . . ? 
C3 C2 C1 119.6(7) . . ? 
N1 C3 C2 120.1(6) . . ? 
O2 C6 O1 126.3(6) . . ? 
O2 C6 C1 117.8(6) . . ? 
O1 C6 C1 115.9(6) . . ? 
C3 N1 O3 120.2(5) . . ? 
C3 N1 C4 121.7(6) . . ? 
O3 N1 C4 118.1(5) . . ? 
C6 O1 Yb1 159.8(5) . . ? 
C6 O2 Yb1 161.1(5) . 3 ? 
N1 O3 Yb1 122.0(4) . 2 ? 
S1 O4 Yb1 98.0(2) . . ? 
S1 O5 Yb1 97.9(2) . . ? 
S1 O6 Yb1 147.2(3) . 3_655 ? 
O7 S1 O6 108.3(3) . . ? 
O7 S1 O5 113.1(3) . . ? 
O6 S1 O5 110.2(3) . . ? 
O7 S1 O4 110.2(3) . . ? 
O6 S1 O4 110.9(3) . . ? 
O5 S1 O4 104.0(3) . . ? 
O7 S1 Yb1 129.8(2) . . ? 
O6 S1 Yb1 121.8(2) . . ? 
O5 S1 Yb1 52.26(18) . . ? 
O4 S1 Yb1 51.91(18) . . ? 
 
loop_ 
 _geom_hbond_atom_site_label_D 
 _geom_hbond_atom_site_label_H 
 _geom_hbond_atom_site_label_A 
 _geom_hbond_distance_DH 
 _geom_hbond_distance_HA 
 _geom_hbond_distance_DA 
 _geom_hbond_angle_DHA 
 _geom_hbond_site_symmetry_A 
O8 H8A O7  0.96(2) 1.82(2) 2.777(6) 173(12) 4_566 
O8 H8B O7  0.96(2) 1.76(2) 2.713(6) 173(9) 1_556 
 
_diffrn_measured_fraction_theta_max    0.996 
_diffrn_reflns_theta_full              27.50 
_diffrn_measured_fraction_theta_full   0.996 
_refine_diff_density_max    1.447 
_refine_diff_density_min   -1.652 
_refine_diff_density_rms    0.239 

#===END


## Crystallographic Data of Complex 14

data_14 
 
_audit_creation_method            SHELXL-97 
_chemical_name_systematic 
; 
 ? 
; 
_chemical_name_common             ? 
_chemical_melting_point           ? 
_chemical_formula_moiety          ? 
_chemical_formula_sum 
 'C6 H6 Lu N O8 S' 
_chemical_formula_weight          427.15 
 
loop_ 
 _atom_type_symbol 
 _atom_type_description 
 _atom_type_scat_dispersion_real 
 _atom_type_scat_dispersion_imag 
 _atom_type_scat_source 
 'C'  'C'   0.0033   0.0016 
 'International Tables Vol C Tables 4.2.6.8 and 6.1.1.4' 
 'H'  'H'   0.0000   0.0000 
 'International Tables Vol C Tables 4.2.6.8 and 6.1.1.4' 
 'N'  'N'   0.0061   0.0033 
 'International Tables Vol C Tables 4.2.6.8 and 6.1.1.4' 
 'O'  'O'   0.0106   0.0060 
 'International Tables Vol C Tables 4.2.6.8 and 6.1.1.4' 
 'Lu'  'Lu'  -0.4720   5.8584 
 'International Tables Vol C Tables 4.2.6.8 and 6.1.1.4' 
 'S'  'S'   0.1246   0.1234 
 'International Tables Vol C Tables 4.2.6.8 and 6.1.1.4' 
 
_symmetry_cell_setting            'monoclinic' 
_symmetry_space_group_name_H-M    'P21/c' 
 
loop_ 
 _symmetry_equiv_pos_as_xyz 
 'x, y, z' 
 '-x, y+1/2, -z+1/2' 
 '-x, -y, -z' 
 'x, -y-1/2, z-1/2' 
 
_cell_length_a                    9.2534(4) 
_cell_length_b                    14.6087(5) 
_cell_length_c                    7.5751(2) 
_cell_angle_alpha                 90.00 
_cell_angle_beta                  100.4133(12) 
_cell_angle_gamma                 90.00 
_cell_volume                      1007.14(6) 
_cell_formula_units_Z             4 
_cell_measurement_temperature     293(2) 
_cell_measurement_reflns_used     12485
_cell_measurement_theta_min        3.395
_cell_measurement_theta_max        27.485
 
_exptl_crystal_description        'block' 
_exptl_crystal_colour             'colorless' 
_exptl_crystal_size_max           0.10 
_exptl_crystal_size_mid           0.10 
_exptl_crystal_size_min           0.10 
_exptl_crystal_density_meas       ? 
_exptl_crystal_density_diffrn     2.817 
_exptl_crystal_density_method     'not measured' 
_exptl_crystal_F_000              800 
_exptl_absorpt_coefficient_mu     10.042 
_exptl_absorpt_correction_type    empirical 
_exptl_absorpt_correction_T_min   0.343 
_exptl_absorpt_correction_T_max   0.382 
_exptl_absorpt_process_details    '(Blessing, 1995, 1997)' 
 
_exptl_special_details 
; 
 ? 
; 
 
_diffrn_ambient_temperature       293(2) 
_diffrn_radiation_wavelength      0.71073 
_diffrn_radiation_type            MoK\a 
_diffrn_radiation_source          'fine-focus sealed tube' 
_diffrn_radiation_monochromator   graphite 
_diffrn_measurement_device_type   'NONIUS KappaCCD Diffractometer' 
_diffrn_measurement_method        'CCD' 
_diffrn_detector_area_resol_mean  0.76 
_diffrn_standards_number          ? 
_diffrn_standards_interval_count  ? 
_diffrn_standards_interval_time   ? 
_diffrn_standards_decay_%         none 
_diffrn_reflns_number             15661 
_diffrn_reflns_av_R_equivalents   0.0914 
_diffrn_reflns_av_sigmaI/netI     0.0698 
_diffrn_reflns_limit_h_min        -12 
_diffrn_reflns_limit_h_max        12 
_diffrn_reflns_limit_k_min        -18 
_diffrn_reflns_limit_k_max        18 
_diffrn_reflns_limit_l_min        -9 
_diffrn_reflns_limit_l_max        9 
_diffrn_reflns_theta_min          3.50 
_diffrn_reflns_theta_max          27.47 
_reflns_number_total              2299 
_reflns_number_gt                 1664 
_reflns_threshold_expression      >2sigma(I) 
 
_computing_data_collection        'KappaCCD (Nonius B. V., 1998)' 
_computing_cell_refinement        'HKL Scalepack (Otwinowski & Minor, 1997)' 
_computing_data_reduction
'HKL Denzo (Otwinowski & Minor, 1997) & maXus (Mackay et al., 1998)'
_computing_structure_solution     'SHELXS-97 (Sheldrick, 1997)' 
_computing_structure_refinement   'SHELXL-97 (Sheldrick, 1997)' 
_computing_molecular_graphics     'Bruker SHELXTL V5.1 (Sheldrick, 1998)' 
_computing_publication_material   'SHELXL-97 (Sheldrick, 1997)' 

_publ_section_references
;
collect:
"Collect" data collection software, Nonius B.V., Delft, The Netherlands, 1998.

HKL Scalepack & HKL Denzo:
Z. Otwinowski and W. Minor, " Processing of X-ray Diffraction Data Collected
in Oscillation Mode ", Methods in Enzymology, Volume 276: Macromolecular
Crystallography, part A, p.307-326, 1997,C.W. Carter, Jr. & R.M. Sweet,
Eds., Academic Press, London.

absorption correction:
R.H. Blessing (1995) Acta Cryst. A51, 33-37.
R.H. Blessing (1997) J.Appl. Cryst. 30, 421-426.

maXus: 
S.Mackay, C.J.Gilmore, C.Edwards, M. Tremayne, N. Stuart, K.Shankland
"maXus: a computer program for the solution and refinement of crystal
structures from diffraction data", University of Glasgow, Scotland, UK,
Nonius BV, Delft, The Netherlands and MacScience Co. Ltd., Yokohama,
Japan (1998).

Sheldrick, G. M. (1998). SHELXTL Version 5.1. Bruker Analytical X-ray
Instruments Inc., Madison, Wisconsin, USA.

Sheldrick, G. M. (1997). SHELX-97. PC Version. University of Goettingen,
Germany.
;
 
_refine_special_details 
; 
 Refinement of F^2^ against ALL reflections.  The weighted R-factor wR and 
 goodness of fit S are based on F^2^, conventional R-factors R are based 
 on F, with F set to zero for negative F^2^. The threshold expression of 
 F^2^ > 2sigma(F^2^) is used only for calculating R-factors(gt) etc. and is 
 not relevant to the choice of reflections for refinement.  R-factors based 
 on F^2^ are statistically about twice as large as those based on F, and R- 
 factors based on ALL data will be even larger. 
; 
 
_refine_ls_structure_factor_coef  Fsqd  
_refine_ls_matrix_type            full 
_refine_ls_weighting_scheme       calc  
_refine_ls_weighting_details 
 'calc w=1/[\s^2^(Fo^2^)+(0.0225P)^2^+0.0000P] where P=(Fo^2^+2Fc^2^)/3' 
_atom_sites_solution_primary      direct 
_atom_sites_solution_secondary    difmap 
_atom_sites_solution_hydrogens    geom 
_refine_ls_hydrogen_treatment     mixed 
_refine_ls_extinction_method      SHELXL 
_refine_ls_extinction_coef        0.0057(3) 
_refine_ls_extinction_expression 
 'Fc^*^=kFc[1+0.001xFc^2^\l^3^/sin(2\q)]^-1/4^' 
_refine_ls_number_reflns          2299 
_refine_ls_number_parameters      163 
_refine_ls_number_restraints      0 
_refine_ls_R_factor_all           0.0560 
_refine_ls_R_factor_gt            0.0317 
_refine_ls_wR_factor_ref          0.0556 
_refine_ls_wR_factor_gt           0.0515 
_refine_ls_goodness_of_fit_ref    0.913 
_refine_ls_restrained_S_all       0.913 
_refine_ls_shift/su_max           0.000 
_refine_ls_shift/su_mean          0.000 
 
loop_ 
 _atom_site_label 
 _atom_site_type_symbol 
 _atom_site_fract_x 
 _atom_site_fract_y 
 _atom_site_fract_z 
 _atom_site_U_iso_or_equiv 
 _atom_site_adp_type 
 _atom_site_occupancy 
 _atom_site_symmetry_multiplicity 
 _atom_site_calc_flag 
 _atom_site_refinement_flags 
 _atom_site_disorder_assembly 
 _atom_site_disorder_group 
Lu1 Lu 0.27539(3) 0.042054(15) 0.13353(3) 0.01815(11) Uani 1 1 d . . . 
C4 C -0.0321(7) 0.3953(4) 0.0978(7) 0.0252(14) Uani 1 1 d . . . 
H1A H 0.0400 0.4386 0.1385 0.030 Uiso 1 1 calc R . . 
C5 C 0.0065(7) 0.3065(4) 0.0709(7) 0.0263(14) Uani 1 1 d . . . 
H2A H 0.1052 0.2898 0.0916 0.032 Uiso 1 1 calc R . . 
C1 C -0.0995(6) 0.2420(4) 0.0138(7) 0.0203(13) Uani 1 1 d . . . 
C2 C -0.2439(7) 0.2699(4) -0.0273(8) 0.0297(15) Uani 1 1 d . . . 
H4A H -0.3172 0.2283 -0.0730 0.036 Uiso 1 1 calc R . . 
C3 C -0.2791(7) 0.3591(4) -0.0006(8) 0.0327(16) Uani 1 1 d . . . 
H5A H -0.3765 0.3779 -0.0281 0.039 Uiso 1 1 calc R . . 
C6 C -0.0565(7) 0.1429(4) 0.0001(7) 0.0200(13) Uani 1 1 d . . . 
N1 N -0.1738(5) 0.4197(3) 0.0651(6) 0.0234(11) Uani 1 1 d . . . 
O1 O 0.0768(5) 0.1237(3) 0.0490(5) 0.0296(10) Uani 1 1 d . . . 
O2 O -0.1567(5) 0.0875(3) -0.0571(5) 0.0286(10) Uani 1 1 d . . . 
O3 O -0.2116(4) 0.5051(2) 0.1029(5) 0.0246(9) Uani 1 1 d . . . 
O4 O 0.4367(4) 0.1323(3) 0.0046(4) 0.0271(10) Uani 1 1 d . . . 
O5 O 0.2816(4) 0.0276(2) -0.1724(5) 0.0246(9) Uani 1 1 d . . . 
O6 O 0.5309(4) 0.0454(3) -0.2240(5) 0.0309(10) Uani 1 1 d . . . 
O7 O 0.3595(5) 0.1667(3) -0.3108(5) 0.0262(10) Uani 1 1 d . . . 
O8 O 0.3510(5) 0.1574(3) 0.3278(6) 0.0296(11) Uani 1 1 d . . . 
S1 S 0.40232(16) 0.09360(9) -0.17989(18) 0.0206(3) Uani 1 1 d . . . 
H8A H 0.369(8) 0.215(5) 0.292(8) 0.06(2) Uiso 1 1 d . . . 
H8B H 0.340(7) 0.161(4) 0.424(8) 0.021(19) Uiso 1 1 d . . . 
 
loop_ 
 _atom_site_aniso_label 
 _atom_site_aniso_U_11 
 _atom_site_aniso_U_22 
 _atom_site_aniso_U_33 
 _atom_site_aniso_U_23 
 _atom_site_aniso_U_13 
 _atom_site_aniso_U_12 
Lu1 0.01844(15) 0.01566(14) 0.02046(15) -0.00010(11) 0.00378(9) -0.00008(12) 
C4 0.025(4) 0.021(3) 0.029(3) 0.000(3) 0.004(3) -0.003(3) 
C5 0.027(4) 0.024(3) 0.028(3) 0.000(3) 0.005(3) 0.000(3) 
C1 0.017(3) 0.021(3) 0.022(3) -0.003(3) 0.003(2) 0.000(3) 
C2 0.022(4) 0.021(3) 0.043(4) -0.011(3) -0.001(3) -0.001(3) 
C3 0.020(4) 0.031(4) 0.043(4) -0.014(3) -0.004(3) 0.001(3) 
C6 0.027(4) 0.015(3) 0.019(3) -0.002(2) 0.007(3) 0.001(3) 
N1 0.026(3) 0.023(3) 0.023(3) -0.001(2) 0.006(2) -0.001(2) 
O1 0.027(3) 0.024(2) 0.037(2) -0.003(2) 0.0011(19) 0.006(2) 
O2 0.028(3) 0.021(2) 0.036(2) -0.0060(19) 0.005(2) -0.003(2) 
O3 0.036(3) 0.0103(18) 0.029(2) -0.0030(17) 0.0108(19) 0.0080(18) 
O4 0.032(3) 0.032(2) 0.019(2) -0.0024(18) 0.0066(17) -0.0099(19) 
O5 0.024(2) 0.025(2) 0.025(2) -0.0022(17) 0.0068(17) -0.0063(17) 
O6 0.024(2) 0.037(2) 0.034(2) 0.008(2) 0.0107(18) 0.012(2) 
O7 0.036(3) 0.021(2) 0.022(2) 0.0066(18) 0.0067(18) 0.0104(19) 
O8 0.046(3) 0.025(3) 0.020(2) 0.003(2) 0.012(2) -0.009(2) 
S1 0.0212(8) 0.0205(7) 0.0200(7) 0.0022(6) 0.0032(6) 0.0027(6) 
 
_geom_special_details 
; 
 All esds (except the esd in the dihedral angle between two l.s. planes) 
 are estimated using the full covariance matrix.  The cell esds are taken 
 into account individually in the estimation of esds in distances, angles 
 and torsion angles; correlations between esds in cell parameters are only 
 used when they are defined by crystal symmetry.  An approximate (isotropic) 
 treatment of cell esds is used for estimating esds involving l.s. planes. 
; 
 
loop_ 
 _geom_bond_atom_site_label_1 
 _geom_bond_atom_site_label_2 
 _geom_bond_distance 
 _geom_bond_site_symmetry_2 
 _geom_bond_publ_flag 
Lu1 O1 2.187(4) . ? 
Lu1 O6 2.207(4) 3_655 ? 
Lu1 O2 2.213(4) 3 ? 
Lu1 O3 2.248(4) 2_545 ? 
Lu1 O8 2.263(4) . ? 
Lu1 O4 2.334(4) . ? 
Lu1 O5 2.338(4) . ? 
Lu1 S1 2.9311(14) . ? 
C4 N1 1.338(7) . ? 
C4 C5 1.372(8) . ? 
C5 C1 1.372(7) . ? 
C1 C2 1.378(8) . ? 
C1 C6 1.510(7) . ? 
C2 C3 1.366(8) . ? 
C3 N1 1.343(7) . ? 
C6 O2 1.247(6) . ? 
C6 O1 1.254(7) . ? 
N1 O3 1.341(6) . ? 
O2 Lu1 2.213(4) 3 ? 
O3 Lu1 2.248(4) 2 ? 
O4 S1 1.488(4) . ? 
O5 S1 1.485(4) . ? 
O6 S1 1.472(4) . ? 
O6 Lu1 2.207(4) 3_655 ? 
O7 S1 1.462(4) . ? 
 
loop_ 
 _geom_angle_atom_site_label_1 
 _geom_angle_atom_site_label_2 
 _geom_angle_atom_site_label_3 
 _geom_angle 
 _geom_angle_site_symmetry_1 
 _geom_angle_site_symmetry_3 
 _geom_angle_publ_flag 
O1 Lu1 O6 177.20(15) . 3_655 ? 
O1 Lu1 O2 92.22(15) . 3 ? 
O6 Lu1 O2 85.60(15) 3_655 3 ? 
O1 Lu1 O3 92.82(15) . 2_545 ? 
O6 Lu1 O3 85.08(14) 3_655 2_545 ? 
O2 Lu1 O3 80.17(14) 3 2_545 ? 
O1 Lu1 O8 85.92(16) . . ? 
O6 Lu1 O8 95.20(16) 3_655 . ? 
O2 Lu1 O8 152.58(16) 3 . ? 
O3 Lu1 O8 72.61(15) 2_545 . ? 
O1 Lu1 O4 97.84(15) . . ? 
O6 Lu1 O4 84.94(14) 3_655 . ? 
O2 Lu1 O4 134.31(13) 3 . ? 
O3 Lu1 O4 142.94(12) 2_545 . ? 
O8 Lu1 O4 72.89(14) . . ? 
O1 Lu1 O5 85.93(14) . . ? 
O6 Lu1 O5 95.25(14) 3_655 . ? 
O2 Lu1 O5 76.30(14) 3 . ? 
O3 Lu1 O5 156.37(13) 2_545 . ? 
O8 Lu1 O5 130.68(15) . . ? 
O4 Lu1 O5 60.27(12) . . ? 
O1 Lu1 S1 93.51(11) . . ? 
O6 Lu1 S1 88.76(11) 3_655 . ? 
O2 Lu1 S1 105.10(11) 3 . ? 
O3 Lu1 S1 171.58(10) 2_545 . ? 
O8 Lu1 S1 102.32(12) . . ? 
O4 Lu1 S1 30.19(9) . . ? 
O5 Lu1 S1 30.14(9) . . ? 
N1 C4 C5 119.8(5) . . ? 
C4 C5 C1 120.4(6) . . ? 
C5 C1 C2 118.5(5) . . ? 
C5 C1 C6 119.8(5) . . ? 
C2 C1 C6 121.7(5) . . ? 
C3 C2 C1 119.7(6) . . ? 
N1 C3 C2 120.5(6) . . ? 
O2 C6 O1 125.9(5) . . ? 
O2 C6 C1 117.2(5) . . ? 
O1 C6 C1 116.9(5) . . ? 
C4 N1 O3 119.5(5) . . ? 
C4 N1 C3 120.9(5) . . ? 
O3 N1 C3 119.5(5) . . ? 
C6 O1 Lu1 159.8(4) . . ? 
C6 O2 Lu1 161.5(4) . 3 ? 
N1 O3 Lu1 122.3(3) . 2 ? 
S1 O4 Lu1 97.72(19) . . ? 
S1 O5 Lu1 97.61(18) . . ? 
S1 O6 Lu1 148.3(3) . 3_655 ? 
O7 S1 O6 109.1(2) . . ? 
O7 S1 O5 112.7(2) . . ? 
O6 S1 O5 110.0(2) . . ? 
O7 S1 O4 110.2(2) . . ? 
O6 S1 O4 110.5(2) . . ? 
O5 S1 O4 104.2(2) . . ? 
O7 S1 Lu1 129.62(17) . . ? 
O6 S1 Lu1 121.30(16) . . ? 
O5 S1 Lu1 52.25(15) . . ? 
O4 S1 Lu1 52.09(15) . . ? 
 
loop_ 
 _geom_hbond_atom_site_label_D 
 _geom_hbond_atom_site_label_H 
 _geom_hbond_atom_site_label_A 
 _geom_hbond_distance_DH 
 _geom_hbond_distance_HA 
 _geom_hbond_distance_DA 
 _geom_hbond_angle_DHA 
 _geom_hbond_site_symmetry_A 
O8 H8A O7  0.91(7) 1.89(7) 2.783(6) 167(6) 4_566 
O8 H8B O7  0.75(6) 1.99(6) 2.728(6) 168(7) 1_556 
 
_diffrn_measured_fraction_theta_max    0.998 
_diffrn_reflns_theta_full              27.47 
_diffrn_measured_fraction_theta_full   0.998 
_refine_diff_density_max    1.338 
_refine_diff_density_min   -1.723 
_refine_diff_density_rms    0.251 

#===END
